# Supplementary material for: Subcellular Localization Prediction of Human Proteins Using Multifeature Selection Methods
Source: Hindawi journal article supplement (doi:10.1155/2022/3288527), 2022-01-01
Supplement: f1 [file 3288527.f1.zip]

**Table S1.** Three feature lists generated by the LightGBM, MCFS, and mRMR methods after the analysis of Boruta

| Rank | LightGBM        | MCFS            | mRMR            |
|------|-----------------|-----------------|-----------------|
| 1    | GO:0031224      | ENSP00000407401 | GO:0070013      |
| 2    | hsa04142        | ENSP00000346725 | GO:0031975      |
| 3    | GO:0005654      | ENSP00000390722 | GO:0031090      |
| 4    | GO:0001578      | ENSP00000328854 | GO:0005887      |
| 5    | GO:0016021      | ENSP00000264279 | GO:0016491      |
| 6    | GO:0005634      | ENSP00000380982 | GO:0005654      |
| 7    | GO:0044450      | ENSP00000371101 | GO:0005886      |
| 8    | GO:0042147      | ENSP00000244230 | ENSP00000405965 |
| 9    | GO:0044424      | ENSP00000408017 | GO:0009060      |
| 10   | GO:0005815      | ENSP00000402733 | GO:0044451      |
| 11   | GO:0043296      | ENSP00000223073 | GO:1901564      |
| 12   | GO:0005911      | ENSP00000291576 | GO:0043566      |
| 13   | GO:0008017      | ENSP00000377385 | GO:0042175      |
| 14   | GO:0044425      | ENSP00000254605 | ENSP00000357748 |
| 15   | GO:0005576      | ENSP00000345917 | GO:0007005      |
| 16   | GO:0019082      | ENSP00000297990 | GO:0043233      |
| 17   | GO:0006664      | hsa00630        | GO:0008201      |
| 18   | ENSP00000407401 | ENSP00000362153 | GO:0046128      |
| 19   | GO:0044438      | ENSP00000253237 | GO:0031078      |
| 20   | GO:0007033      | ENSP00000307525 | GO:0043232      |
| 21   | GO:0005730      | ENSP00000362105 | GO:0098588      |
| 22   | GO:0005615      | ENSP00000268802 | GO:0044459      |
| 23   | GO:0003069      | ENSP00000382392 | GO:0045333      |
| 24   | GO:0005770      | ENSP00000251289 | GO:0031974      |
| 25   | GO:0005596      | ENSP00000254940 | GO:0048037      |
| 26   | GO:0098742      | ENSP00000327179 | GO:0016021      |
| 27   | GO:0005768      | ENSP00000370968 | GO:0016925      |
| 28   | hsa00520        | ENSP00000225298 | GO:0016072      |
| 29   | GO:0033276      | ENSP00000308179 | GO:0003682      |
| 30   | GO:0031984      | ENSP00000358563 | GO:1901657      |
| 31   | GO:0031090      | ENSP00000247003 | ENSP00000263239 |
| 32   | GO:0097212      | ENSP00000232888 | GO:1902494      |
| 33   | GO:0005783      | ENSP00000320917 | GO:0016604      |
| 34   | GO:0032421      | ENSP00000301364 | GO:0045261      |
| 35   | GO:0044782      | ENSP00000236051 | GO:0016054      |
| 36   | GO:0044429      | ENSP00000360828 | GO:0005789      |
| 37   | GO:0016197      | ENSP00000311135 | ENSP00000317578 |
| 38   | GO:0005740      | hsa00120        | GO:0032991      |
| 39   | GO:0031966      | ENSP00000370589 | GO:0046034      |
| 40   | GO:0005814      | ENSP00000353246 | GO:0016569      |
| 41   | GO:0044432      | ENSP00000285814 | GO:0004386      |
| 42   | GO:0005789      | ENSP00000259239 | GO:0044743      |
| 43   | GO:0005929      | ENSP00000296792 | GO:0044772      |
| 44   | GO:0000775      | ENSP00000322396 | ENSP00000317159 |
| 45   | GO:0032947      | ENSP00000268854 | GO:0005615      |
| 46   | GO:0008173      | ENSP00000360031 | GO:0031047      |
| 47   | GO:0005759      | ENSP00000323858 | GO:2001252      |
| 48   | GO:0016327      | ENSP00000258772 | GO:0009161      |
| 49   | GO:0016020      | ENSP00000272521 | ENSP00000254940 |

|     |                 |                 |                 |
|-----|-----------------|-----------------|-----------------|
| 50  | GO:0005262      | ENSP00000328690 | GO:0031224      |
| 51  | GO:0007034      | hsa04146        | GO:0043228      |
| 52  | GO:0005575      | ENSP00000379760 | GO:0004402      |
| 53  | GO:0002250      | ENSP00000308332 | GO:0046129      |
| 54  | GO:0043543      | ENSP00000354040 | GO:0004527      |
| 55  | GO:0031301      | ENSP00000238146 | GO:0000803      |
| 56  | GO:0005198      | ENSP00000315674 | GO:0005758      |
| 57  | hsa05110        | ENSP00000304151 | ENSP00000355471 |
| 58  | GO:0098536      | ENSP00000339145 | GO:0044444      |
| 59  | GO:0045211      | ENSP00000371169 | GO:0045934      |
| 60  | GO:0043687      | ENSP00000314348 | GO:0006353      |
| 61  | GO:0043021      | ENSP00000244496 | GO:0070822      |
| 62  | GO:0005622      | ENSP00000368887 | GO:0045275      |
| 63  | GO:0000729      | ENSP00000257829 | GO:0033750      |
| 64  | GO:0050684      | ENSP00000367029 | GO:0050662      |
| 65  | GO:0005875      | ENSP00000361092 | GO:0034708      |
| 66  | GO:0005856      | ENSP00000380033 | ENSP00000266544 |
| 67  | GO:0005794      | ENSP00000258531 | GO:0006289      |
| 68  | GO:0044441      | ENSP00000203001 | GO:0009124      |
| 69  | GO:0019637      | hsa00020        | GO:0044454      |
| 70  | GO:0016757      | ENSP00000380495 | ENSP00000326981 |
| 71  | GO:0007041      | ENSP00000366629 | GO:0044798      |
| 72  | GO:0005253      | ENSP00000326981 | GO:0051606      |
| 73  | GO:0051932      | ENSP00000314441 | hsa00630        |
| 74  | GO:0009056      | ENSP00000359688 | ENSP00000345917 |
| 75  | GO:0005795      | hsa00280        | GO:0017136      |
| 76  | hsa00010        | ENSP00000364320 | GO:1990204      |
| 77  | GO:0031503      | ENSP00000366519 | GO:0018196      |
| 78  | GO:0000715      | ENSP00000319771 | GO:0042254      |
| 79  | GO:0034399      | ENSP00000355565 | GO:0098800      |
| 80  | GO:0031975      | ENSP00000395772 | GO:0032259      |
| 81  | GO:0007005      | hsa04142        | GO:0051186      |
| 82  | GO:0004540      | ENSP00000284690 | ENSP00000260443 |
| 83  | GO:0000242      | ENSP00000229214 | GO:0050911      |
| 84  | GO:0000139      | ENSP00000414514 | GO:0009163      |
| 85  | ENSP00000344818 | ENSP00000250937 | ENSP00000370589 |
| 86  | hsa05016        | ENSP00000417464 | GO:0072329      |
| 87  | GO:0009617      | ENSP00000275820 | GO:0051172      |
| 88  | GO:1901137      | ENSP00000358812 | GO:0044452      |
| 89  | GO:0090034      | ENSP00000364037 | GO:0009168      |
| 90  | GO:0044446      | ENSP00000261708 | GO:0005549      |
| 91  | GO:0042175      | ENSP00000331815 | GO:0006338      |
| 92  | GO:0015631      | ENSP00000260184 | GO:0034660      |
| 93  | GO:0005776      | ENSP00000305702 | GO:0051536      |
| 94  | GO:0050780      | ENSP00000283109 | GO:0043413      |
| 95  | GO:0048193      | ENSP00000393101 | GO:0044711      |
| 96  | GO:0031967      | ENSP00000202816 | ENSP00000395772 |
| 97  | GO:0007264      | ENSP00000321320 | ENSP00000269260 |
| 98  | GO:0098781      | ENSP00000338862 | ENSP00000007516 |
| 99  | GO:0031300      | ENSP00000261406 | GO:0005539      |
| 100 | GO:0005813      | ENSP00000338573 | GO:0005732      |
| 101 | hsa04145        | ENSP00000374399 | GO:0043436      |
| 102 | GO:0046148      | ENSP00000261015 | GO:0006283      |

|     |                 |                 |                 |
|-----|-----------------|-----------------|-----------------|
| 103 | GO:0044455      | ENSP00000355987 | GO:0009205      |
| 104 | GO:0043269      | ENSP00000402338 | GO:0045892      |
| 105 | GO:0031985      | ENSP00000355541 | GO:0004984      |
| 106 | GO:0010631      | ENSP00000267425 | ENSP00000229214 |
| 107 | GO:0009226      | ENSP00000317159 | GO:0016458      |
| 108 | GO:1901094      | ENSP00000357748 | ENSP00000322450 |
| 109 | GO:0017069      | ENSP00000384316 | GO:0016274      |
| 110 | GO:0008150      | ENSP00000361232 | GO:0070911      |
| 111 | GO:0005975      | ENSP00000337518 | GO:0099537      |
| 112 | ENSP00000390722 | ENSP00000265245 | ENSP00000301585 |
| 113 | GO:0060271      | ENSP00000363746 | GO:0032392      |
| 114 | GO:0005743      | ENSP00000263774 | GO:0004930      |
| 115 | GO:0044766      | ENSP00000266544 | GO:0004532      |
| 116 | GO:0043220      | hsa00071        | GO:0035097      |
| 117 | hsa04725        | ENSP00000263239 | GO:0008535      |
| 118 | hsa04141        | ENSP00000278856 | ENSP00000264279 |
| 119 | GO:0046914      | ENSP00000311977 | GO:1901681      |
| 120 | GO:0003682      | hsa00640        | GO:0010257      |
| 121 | GO:0098589      | ENSP00000297579 | GO:0016363      |
| 122 | GO:0071944      | ENSP00000230340 | GO:1901566      |
| 123 | GO:0044267      | ENSP00000384302 | GO:0050907      |
| 124 | GO:0008353      | ENSP00000274849 | GO:1902589      |
| 125 | GO:0006892      | ENSP00000260619 | GO:0016651      |
| 126 | GO:0004602      | ENSP00000302886 | GO:0010558      |
| 127 | GO:0044422      | ENSP00000352021 | ENSP00000358563 |
| 128 | GO:0034453      | ENSP00000407515 | GO:0045252      |
| 129 | GO:0033108      | ENSP00000377523 | GO:0030686      |
| 130 | ENSP00000405965 | ENSP00000246802 | GO:0006790      |
| 131 | GO:0061695      | ENSP00000366623 | GO:0050906      |
| 132 | GO:0051797      | hsa00620        | ENSP00000261406 |
| 133 | GO:0006863      | ENSP00000321449 | GO:0098813      |
| 134 | GO:0005788      | ENSP00000348596 | GO:0042775      |
| 135 | GO:0004148      | ENSP00000363642 | GO:0043966      |
| 136 | GO:0098542      | hsa00190        | GO:0006399      |
| 137 | GO:0070661      | ENSP00000386134 | GO:0010389      |
| 138 | GO:0046931      | ENSP00000405614 | ENSP00000263657 |
| 139 | GO:0044743      | ENSP00000298746 | GO:0009593      |
| 140 | GO:0043231      | ENSP00000221801 | GO:0045257      |
| 141 | GO:0042384      | ENSP00000360412 | GO:0018205      |
| 142 | GO:0034067      | ENSP00000356548 | GO:0015075      |
| 143 | GO:0031623      | ENSP00000367361 | GO:0045239      |
| 144 | GO:0016874      | ENSP00000350524 | GO:0045171      |
| 145 | GO:0009225      | ENSP00000333934 | ENSP00000283109 |
| 146 | GO:1902224      | ENSP00000296802 | hsa04146        |
| 147 | GO:0016323      | ENSP00000350352 | hsa03008        |
| 148 | GO:0014704      | ENSP00000261741 | hsa04740        |
| 149 | GO:0010992      | ENSP00000402869 | GO:0000075      |
| 150 | GO:0009057      | ENSP00000332340 | GO:0032981      |
| 151 | GO:0008375      | ENSP00000372695 | GO:0001076      |
| 152 | GO:0008270      | ENSP00000361010 | GO:0043603      |
| 153 | GO:0005777      | hsa00072        | GO:0031060      |
| 154 | GO:0098791      | ENSP00000230640 | GO:0051225      |
| 155 | GO:0070925      | ENSP00000263657 | ENSP00000315774 |

|     |            |                 |                 |
|-----|------------|-----------------|-----------------|
| 156 | GO:0043168 | ENSP00000234170 | GO:0007608      |
| 157 | GO:0034708 | ENSP00000348722 | ENSP00000382392 |
| 158 | GO:0031988 | hsa03013        | GO:0009062      |
| 159 | GO:0002455 | ENSP00000327070 | GO:0006323      |
| 160 | GO:0098588 | ENSP00000350698 | GO:0048039      |
| 161 | GO:0044703 | ENSP00000343081 | GO:0031327      |
| 162 | GO:0034260 | ENSP00000301585 | GO:0016591      |
| 163 | GO:0019730 | ENSP00000253107 | ENSP00000353246 |
| 164 | GO:0005774 | ENSP00000264670 | GO:0044710      |
| 165 | GO:0005643 | ENSP00000381655 | GO:0007606      |
| 166 | GO:0002474 | ENSP00000355899 | GO:0033108      |
| 167 | GO:1990234 | hsa05012        | GO:0006325      |
| 168 | GO:1900115 | ENSP00000395187 | ENSP00000364320 |
| 169 | GO:0060456 | ENSP00000260563 | GO:0022857      |
| 170 | GO:0044451 | ENSP00000410530 | GO:0045259      |
| 171 | GO:0044255 | ENSP00000263331 | GO:0006974      |
| 172 | GO:0035091 | ENSP00000365806 | GO:0004540      |
| 173 | GO:0032580 | hsa03008        | GO:0005782      |
| 174 | GO:0031461 | ENSP00000362687 | GO:0007600      |
| 175 | GO:0030529 | ENSP00000412483 | GO:0016741      |
| 176 | GO:0030054 | ENSP00000233114 | GO:0044839      |
| 177 | GO:0000280 | ENSP00000402802 | GO:0090568      |
| 178 | GO:2000001 | ENSP00000364649 | ENSP00000216254 |
| 179 | GO:0099512 | ENSP00000355471 | ENSP00000236051 |
| 180 | GO:0061726 | ENSP00000225296 | GO:0003713      |
| 181 | GO:0051861 | ENSP00000199320 | GO:0006553      |
| 182 | GO:0051817 | ENSP00000222567 | GO:0031984      |
| 183 | GO:0048519 | ENSP00000331111 | GO:0034388      |
| 184 | GO:0046037 | hsa00380        | GO:0044712      |
| 185 | GO:0044464 | ENSP00000203407 | GO:0009890      |
| 186 | GO:0019673 | ENSP00000310668 | GO:0007067      |
| 187 | GO:0015874 | ENSP00000374390 | ENSP00000334051 |
| 188 | GO:0015851 | ENSP00000362873 | ENSP00000327268 |
| 189 | GO:0015698 | ENSP00000373090 | ENSP00000362105 |
| 190 | GO:0007040 | ENSP00000330460 | GO:0006281      |
| 191 | GO:0006900 | ENSP00000403576 | GO:0016614      |
| 192 | GO:0006575 | ENSP00000249269 | GO:0030490      |
| 193 | GO:0005623 | ENSP00000317992 | GO:0050877      |
| 194 | GO:0002923 | ENSP00000394290 | GO:0005736      |
| 195 | hsa04146   | hsa00510        | GO:0032446      |
| 196 | GO:0061077 | ENSP00000281701 | GO:0045240      |
| 197 | GO:0048524 | ENSP00000399454 | GO:0010501      |
| 198 | GO:0042391 | ENSP00000314193 | GO:0044700      |
| 199 | GO:0022400 | ENSP00000350011 | GO:0065004      |
| 200 | GO:0016668 | ENSP00000362036 | ENSP00000387262 |
| 201 | GO:0016604 | ENSP00000254803 | GO:1903507      |
| 202 | GO:0010390 | hsa00650        | GO:0006575      |
| 203 | GO:0009311 | ENSP00000405965 | GO:0016675      |
| 204 | GO:0009064 | ENSP00000357535 | GO:0099600      |
| 205 | GO:0008194 | ENSP00000396454 | GO:0022891      |
| 206 | GO:0007017 | ENSP00000399753 | ENSP00000296802 |
| 207 | GO:0006626 | hsa03040        | GO:0072524      |
| 208 | GO:0005829 | ENSP00000297873 | GO:1902749      |

|     |                 |                 |                 |
|-----|-----------------|-----------------|-----------------|
| 209 | GO:0000939      | ENSP00000327268 | ENSP00000328854 |
| 210 | hsa00510        | ENSP00000225402 | GO:0016407      |
| 211 | GO:0051701      | ENSP00000260443 | ENSP00000306397 |
| 212 | GO:0043015      | ENSP00000356476 | GO:0043270      |
| 213 | GO:0042578      | ENSP00000409367 | GO:0038023      |
| 214 | GO:0034703      | ENSP00000315774 | GO:0045254      |
| 215 | GO:0034660      | ENSP00000372199 | ENSP00000225298 |
| 216 | GO:0032592      | ENSP00000268379 | GO:0032435      |
| 217 | GO:0031253      | ENSP00000303515 | GO:0050136      |
| 218 | GO:0031023      | hsa00533        | GO:0032204      |
| 219 | GO:0009295      | ENSP00000378857 | GO:0046782      |
| 220 | GO:0008237      | ENSP00000323424 | GO:0009066      |
| 221 | GO:0007126      | ENSP00000215375 | GO:0016577      |
| 222 | GO:0007098      | hsa03010        | GO:0007186      |
| 223 | GO:0005779      | ENSP00000403536 | ENSP00000380033 |
| 224 | GO:0004175      | ENSP00000322450 | GO:0008137      |
| 225 | GO:0000930      | ENSP00000407436 | hsa04110        |
| 226 | GO:1901004      | ENSP00000261637 | GO:0004518      |
| 227 | GO:0071383      | ENSP00000411162 | GO:0016676      |
| 228 | GO:0048384      | ENSP00000412251 | GO:0004888      |
| 229 | GO:0043297      | ENSP00000413572 | GO:0008026      |
| 230 | GO:0015931      | ENSP00000313953 | GO:0008227      |
| 231 | GO:0007276      | hsa00900        | GO:0097031      |
| 232 | GO:0006998      | hsa00310        | GO:0000981      |
| 233 | GO:0006396      | ENSP00000328671 | GO:0043144      |
| 234 | GO:0005667      | ENSP00000409074 | GO:0051287      |
| 235 | GO:0004674      | ENSP00000396441 | GO:0045814      |
| 236 | GO:0001618      | ENSP00000233190 | ENSP00000234170 |
| 237 | GO:0000045      | ENSP00000342056 | ENSP00000357535 |
| 238 | GO:1901032      | ENSP00000377944 | GO:0006482      |
| 239 | GO:0097060      | hsa00410        | ENSP00000223073 |
| 240 | GO:0016787      | ENSP00000310042 | GO:0000989      |
| 241 | GO:0007043      | ENSP00000306397 | hsa00620        |
| 242 | GO:0004222      | ENSP00000365837 | GO:0007059      |
| 243 | GO:0003954      | ENSP00000345895 | GO:0051537      |
| 244 | GO:0050794      | ENSP00000387262 | GO:0022892      |
| 245 | GO:0048520      | hsa03020        | GO:0006304      |
| 246 | GO:0046903      | ENSP00000377446 | ENSP00000199320 |
| 247 | GO:0043236      | ENSP00000356972 | GO:0019395      |
| 248 | GO:0038023      | ENSP00000309565 | GO:0070034      |
| 249 | GO:0036126      | ENSP00000007516 | ENSP00000356972 |
| 250 | GO:0010604      | ENSP00000360329 | ENSP00000259037 |
| 251 | GO:0008092      | ENSP00000330737 | GO:0046496      |
| 252 | GO:0005581      | ENSP00000320567 | GO:0048285      |
| 253 | GO:0002697      | hsa03015        | GO:0000154      |
| 254 | GO:0000268      | ENSP00000303983 | ENSP00000314348 |
| 255 | ENSP00000225298 | hsa03018        | GO:0006305      |
| 256 | GO:1903513      | ENSP00000318158 | ENSP00000248572 |
| 257 | GO:0070098      | hsa05016        | GO:0006163      |
| 258 | GO:0051321      | ENSP00000259037 | ENSP00000362649 |
| 259 | GO:0043395      | ENSP00000332887 | GO:0031093      |
| 260 | GO:0031225      | ENSP00000367934 | GO:0008173      |
| 261 | GO:0016607      | ENSP00000262946 | GO:0007154      |

|     |                 |                 |                 |
|-----|-----------------|-----------------|-----------------|
| 262 | GO:0009986      | ENSP00000253452 | GO:0007093      |
| 263 | GO:0005681      | ENSP00000317780 | GO:0005749      |
| 264 | hsa05146        | ENSP00000296684 | GO:0003735      |
| 265 | hsa04911        | hsa03022        | GO:1902850      |
| 266 | hsa04070        | ENSP00000345793 | ENSP00000370968 |
| 267 | hsa00480        | ENSP00000349142 | GO:0060089      |
| 268 | GO:1901977      | ENSP00000247866 | GO:0019233      |
| 269 | GO:0070374      | ENSP00000262607 | GO:0015985      |
| 270 | GO:0070201      | hsa00100        | GO:0006368      |
| 271 | GO:0051606      | hsa00010        | GO:0001522      |
| 272 | GO:0050962      | ENSP00000258424 | GO:0015002      |
| 273 | GO:0044431      | ENSP00000419740 | hsa00071        |
| 274 | GO:0043167      | ENSP00000282050 | ENSP00000247003 |
| 275 | GO:0042748      | ENSP00000216254 | GO:0004872      |
| 276 | GO:0042254      | ENSP00000301587 | GO:0070125      |
| 277 | GO:0036019      | ENSP00000356953 | GO:0044154      |
| 278 | GO:0035821      | ENSP00000364699 | GO:0006402      |
| 279 | GO:0032922      | ENSP00000358737 | GO:0044283      |
| 280 | GO:0019866      | ENSP00000233627 | ENSP00000253452 |
| 281 | GO:0018149      | ENSP00000346839 | GO:0006303      |
| 282 | GO:0016311      | hsa04110        | GO:0030688      |
| 283 | GO:0010971      | ENSP00000262030 | GO:0015986      |
| 284 | GO:0005874      | hsa03030        | GO:0050434      |
| 285 | GO:0005778      | ENSP00000284727 | GO:0005740      |
| 286 | GO:0004386      | hsa00830        | GO:0090305      |
| 287 | GO:0003878      | hsa04530        | GO:0010390      |
| 288 | GO:0000375      | ENSP00000360492 | GO:0004871      |
| 289 | GO:1903900      | ENSP00000268668 | ENSP00000380982 |
| 290 | GO:0070013      | hsa00601        | GO:0032434      |
| 291 | GO:0051905      | ENSP00000389649 | GO:0055065      |
| 292 | GO:0051056      | ENSP00000361084 | GO:0046394      |
| 293 | GO:0050678      | hsa05150        | GO:0055085      |
| 294 | GO:0045324      | ENSP00000285949 | GO:0008175      |
| 295 | GO:0043202      | hsa00670        | GO:0044431      |
| 296 | GO:0042470      | ENSP00000308938 | ENSP00000309565 |
| 297 | GO:0035767      | ENSP00000276585 | GO:0009150      |
| 298 | GO:0033692      | hsa00514        | ENSP00000325682 |
| 299 | GO:0032993      | ENSP00000276689 | ENSP00000314193 |
| 300 | GO:0031970      | ENSP00000269260 | GO:0035064      |
| 301 | GO:0030173      | ENSP00000361965 | GO:0016866      |
| 302 | GO:0022406      | hsa04640        | GO:0008213      |
| 303 | GO:0016791      | hsa00520        | GO:0051168      |
| 304 | GO:0016591      | ENSP00000299166 | GO:0007283      |
| 305 | GO:0010257      | hsa04740        | GO:0016742      |
| 306 | GO:0008277      | hsa04610        | ENSP00000358737 |
| 307 | GO:0006997      | ENSP00000362649 | ENSP00000301364 |
| 308 | GO:0006625      | hsa05010        | GO:0007165      |
| 309 | GO:0005782      | hsa04260        | GO:0000794      |
| 310 | GO:0005539      | ENSP00000330937 | GO:0034220      |
| 311 | GO:0002360      | hsa00030        | GO:0044439      |
| 312 | ENSP00000203407 | ENSP00000254810 | ENSP00000258772 |
| 313 | hsa00500        | hsa05203        | GO:0055086      |
| 314 | GO:2000785      | hsa00240        | GO:0044728      |

|     |                 |                 |                 |
|-----|-----------------|-----------------|-----------------|
| 315 | GO:1901606      | ENSP00000290866 | ENSP00000371377 |
| 316 | GO:0090557      | ENSP00000334051 | GO:0034475      |
| 317 | GO:0043243      | ENSP00000370473 | ENSP00000379760 |
| 318 | GO:0043229      | ENSP00000258105 | GO:0006119      |
| 319 | GO:0043032      | hsa00260        | GO:0016580      |
| 320 | GO:0042276      | ENSP00000317578 | GO:0005741      |
| 321 | GO:0031965      | hsa00250        | ENSP00000374399 |
| 322 | GO:0030817      | ENSP00000287022 | hsa00640        |
| 323 | GO:0030490      | ENSP00000260227 | GO:0000723      |
| 324 | GO:0017015      | ENSP00000331545 | ENSP00000333934 |
| 325 | GO:0008536      | ENSP00000316955 | GO:0006873      |
| 326 | GO:0007007      | ENSP00000344818 | ENSP00000316955 |
| 327 | GO:0006820      | ENSP00000262367 | GO:0043933      |
| 328 | GO:0006816      | ENSP00000312652 | ENSP00000354040 |
| 329 | GO:0006487      | ENSP00000252711 | GO:0051321      |
| 330 | GO:0006486      | hsa04670        | GO:0044391      |
| 331 | ENSP00000216492 | ENSP00000416330 | ENSP00000367029 |
| 332 | hsa04744        | hsa00330        | ENSP00000387523 |
| 333 | GO:1901879      | hsa04060        | GO:0001077      |
| 334 | GO:0098805      | ENSP00000386047 | GO:0006306      |
| 335 | GO:0098796      | hsa00140        | ENSP00000247866 |
| 336 | GO:0090179      | hsa00500        | GO:0006753      |
| 337 | GO:0071013      | hsa04623        | ENSP00000302886 |
| 338 | GO:0045766      | ENSP00000352839 | GO:0004774      |
| 339 | GO:0043112      | ENSP00000255030 | GO:1902750      |
| 340 | GO:0034308      | ENSP00000223095 | GO:0051236      |
| 341 | GO:0033233      | hsa05323        | ENSP00000327585 |
| 342 | GO:0031935      | ENSP00000290299 | GO:0070545      |
| 343 | GO:0031333      | hsa00980        | GO:0007052      |
| 344 | GO:0031304      | hsa00590        | GO:2000756      |
| 345 | GO:0030234      | ENSP00000218388 | ENSP00000318158 |
| 346 | GO:0030027      | ENSP00000307786 | GO:1901361      |
| 347 | GO:0018198      | hsa04614        | GO:0007094      |
| 348 | GO:0016747      | ENSP00000264498 | GO:0019867      |
| 349 | GO:0015296      | hsa05130        | ENSP00000244623 |
| 350 | GO:0008037      | ENSP00000306974 | GO:0015992      |
| 351 | GO:0005742      | hsa04145        | GO:0016607      |
| 352 | GO:0000979      | ENSP00000348170 | ENSP00000328690 |
| 353 | ENSP00000338573 | hsa00970        | GO:0007346      |
| 354 | GO:1901575      | hsa04062        | GO:0050921      |
| 355 | GO:0099568      | ENSP00000209540 | ENSP00000399078 |
| 356 | GO:0098862      | ENSP00000001146 | ENSP00000339145 |
| 357 | GO:0090288      | hsa04921        | ENSP00000258105 |
| 358 | GO:0090287      | ENSP00000304419 | GO:0010959      |
| 359 | GO:0051276      | hsa03420        | ENSP00000350698 |
| 360 | GO:0051219      | ENSP00000264563 | GO:0044815      |
| 361 | GO:0044798      | ENSP00000258743 | GO:0016042      |
| 362 | GO:0044437      | hsa04742        | GO:0000314      |
| 363 | GO:0044309      | hsa00220        | ENSP00000297990 |
| 364 | GO:0043226      | ENSP00000231751 | GO:0007126      |
| 365 | GO:0035267      | ENSP00000264998 | ENSP00000317780 |
| 366 | GO:0031974      | hsa04070        | ENSP00000323858 |
| 367 | GO:0030139      | hsa04540        | GO:0043565      |

|     |                 |                 |                 |
|-----|-----------------|-----------------|-----------------|
| 368 | GO:0022829      | hsa00350        | GO:0072521      |
| 369 | GO:0022613      | hsa04514        | GO:1901575      |
| 370 | GO:0019724      | hsa04144        | GO:0006336      |
| 371 | GO:0016050      | hsa04723        | GO:0001676      |
| 372 | GO:0015085      | ENSP00000307130 | ENSP00000380153 |
| 373 | GO:0010739      | hsa00480        | GO:0008301      |
| 374 | GO:0008535      | hsa05110        | ENSP00000254605 |
| 375 | GO:0008238      | ENSP00000297350 | GO:0016884      |
| 376 | GO:0007097      | hsa05132        | GO:0030141      |
| 377 | GO:0006839      | ENSP00000248572 | GO:0000275      |
| 378 | GO:0006644      | hsa04810        | ENSP00000254810 |
| 379 | GO:0006090      | ENSP00000285600 | GO:0097472      |
| 380 | GO:0005886      | ENSP00000265171 | ENSP00000357134 |
| 381 | GO:0005796      | hsa04512        | GO:0006779      |
| 382 | GO:0005775      | hsa04114        | GO:0005840      |
| 383 | GO:0003924      | hsa04080        | GO:0001561      |
| 384 | GO:0001824      | ENSP00000350720 | ENSP00000202816 |
| 385 | GO:0000323      | ENSP00000338548 | ENSP00000332887 |
| 386 | ENSP00000304133 | hsa00860        | GO:0044265      |
| 387 | ENSP00000301585 | hsa05200        | GO:0043967      |
| 388 | ENSP00000231751 | ENSP00000304133 | GO:0005102      |
| 389 | GO:0065003      | hsa04970        | ENSP00000257829 |
| 390 | GO:0060712      | hsa04151        | GO:0009063      |
| 391 | GO:0051439      | ENSP00000356671 | ENSP00000308938 |
| 392 | GO:0046966      | hsa04330        | GO:1901799      |
| 393 | GO:0046488      | ENSP00000357134 | GO:0043527      |
| 394 | GO:0046467      | ENSP00000302150 | ENSP00000324769 |
| 395 | GO:0045454      | hsa04933        | GO:0030003      |
| 396 | GO:0044712      | ENSP00000275525 | GO:0016758      |
| 397 | GO:0044448      | ENSP00000344453 | ENSP00000362153 |
| 398 | GO:0044282      | hsa04911        | hsa00010        |
| 399 | GO:0043484      | ENSP00000311038 | GO:0022617      |
| 400 | GO:0043228      | ENSP00000325203 | ENSP00000303864 |
| 401 | GO:0036297      | hsa05144        | ENSP00000308332 |
| 402 | GO:0036066      | ENSP00000263253 | GO:0016572      |
| 403 | GO:0034622      | ENSP00000295897 | GO:1901606      |
| 404 | GO:0033059      | ENSP00000326259 | ENSP00000296684 |
| 405 | GO:0032467      | ENSP00000355436 | GO:0031903      |
| 406 | GO:0031579      | ENSP00000398698 | ENSP00000346725 |
| 407 | GO:0031047      | ENSP00000220616 | GO:0008528      |
| 408 | GO:0030695      | hsa04727        | GO:0030521      |
| 409 | GO:0030667      | hsa05205        | GO:0006446      |
| 410 | GO:0030060      | hsa04020        | ENSP00000299166 |
| 411 | GO:0016758      | hsa05146        | ENSP00000404102 |
| 412 | GO:0009101      | hsa05143        | ENSP00000363746 |
| 413 | GO:0007031      | hsa05321        | GO:0009056      |
| 414 | GO:0006261      | ENSP00000304188 | GO:0098589      |
| 415 | GO:0002251      | hsa05215        | ENSP00000377385 |
| 416 | GO:0000805      | hsa04918        | GO:0045263      |
| 417 | GO:0000055      | ENSP00000206249 | GO:0051568      |
| 418 | ENSP00000264998 | ENSP00000348986 | GO:0015630      |
| 419 | hsa05034        | hsa05169        | ENSP00000377799 |
| 420 | hsa03013        | ENSP00000368244 | ENSP00000417464 |



|     |            |                 |                 |
|-----|------------|-----------------|-----------------|
| 421 | hsa00640   | hsa04730        | GO:0045944      |
| 422 | GO:1902305 | hsa04976        | GO:0016616      |
| 423 | GO:1900034 | ENSP00000355430 | GO:0000786      |
| 424 | GO:0098590 | ENSP00000408153 | ENSP00000355541 |
| 425 | GO:0097208 | ENSP00000330341 | GO:0019080      |
| 426 | GO:0090575 | ENSP00000321246 | ENSP00000355430 |
| 427 | GO:0090305 | hsa04932        | GO:0070838      |
| 428 | GO:0071875 | hsa05142        | GO:0044723      |
| 429 | GO:0048002 | hsa04728        | GO:0008176      |
| 430 | GO:0045933 | ENSP00000306688 | ENSP00000353947 |
| 431 | GO:0045814 | ENSP00000296099 | GO:0032984      |
| 432 | GO:0044248 | ENSP00000325682 | GO:0006370      |
| 433 | GO:0043234 | ENSP00000306651 | ENSP00000366519 |
| 434 | GO:0042393 | ENSP00000355443 | GO:0004739      |
| 435 | GO:0038044 | ENSP00000323612 | GO:0031497      |
| 436 | GO:0036276 | hsa00983        | GO:0071174      |
| 437 | GO:0031577 | ENSP00000353947 | ENSP00000344453 |
| 438 | GO:0030133 | ENSP00000303076 | GO:0008652      |
| 439 | GO:0030036 | ENSP00000325128 | ENSP00000296792 |
| 440 | GO:0016746 | ENSP00000278407 | GO:0051028      |
| 441 | GO:0016605 | hsa05034        | GO:0043628      |
| 442 | GO:0009611 | ENSP00000266646 | GO:0051262      |
| 443 | GO:0008233 | hsa04726        | ENSP00000328563 |
| 444 | GO:0006643 | hsa05168        | GO:1902600      |
| 445 | GO:0006473 | ENSP00000306245 | ENSP00000372695 |
| 446 | GO:0006391 | ENSP00000295400 | GO:0000724      |
| 447 | GO:0005923 | hsa04014        | GO:0048521      |
| 448 | GO:0005902 | ENSP00000404102 | ENSP00000364649 |
| 449 | GO:0005765 | hsa04120        | GO:0046112      |
| 450 | GO:0005739 | ENSP00000322088 | ENSP00000324251 |
| 451 | GO:0005614 | hsa04962        | GO:0008324      |
| 452 | GO:0003824 | hsa04960        | GO:0044255      |
| 453 | GO:0003676 | ENSP00000332504 | ENSP00000360828 |
| 454 | GO:0002384 | hsa04744        | GO:0006754      |
| 455 | hsa00310   | hsa04310        | GO:0072503      |
| 456 | GO:2000296 | ENSP00000306095 | ENSP00000254803 |
| 457 | GO:1902115 | hsa04270        | ENSP00000322939 |
| 458 | GO:0070372 | hsa04973        | GO:0002740      |
| 459 | GO:0051179 | hsa04141        | GO:0006637      |
| 460 | GO:0046541 | hsa04720        | ENSP00000405614 |
| 461 | GO:0044430 | ENSP00000409384 | GO:0045277      |
| 462 | GO:0043933 | hsa05414        | GO:0008649      |
| 463 | GO:0043679 | ENSP00000310337 | GO:0070734      |
| 464 | GO:0043209 | ENSP00000399078 | ENSP00000309673 |
| 465 | GO:0042059 | GO:0010727      | GO:0010605      |
| 466 | GO:0034975 | GO:0010720      | ENSP00000389649 |
| 467 | GO:0032271 | GO:0010716      | GO:0061045      |
| 468 | GO:0031248 | GO:0010715      | GO:1903900      |
| 469 | GO:0016725 | GO:0010714      | ENSP00000362687 |
| 470 | GO:0016675 | GO:0010712      | ENSP00000306974 |
| 471 | GO:0016651 | GO:0010711      | GO:0008135      |
| 472 | GO:0012505 | GO:0010648      | GO:0016602      |
| 473 | GO:0007289 | GO:0010647      | GO:0002687      |

|     |            |            |                 |
|-----|------------|------------|-----------------|
| 474 | GO:0006901 | GO:0010646 | ENSP00000225296 |
| 475 | GO:0002920 | GO:0010644 | ENSP00000306688 |
| 476 | GO:0002431 | GO:0010639 | ENSP00000284727 |
| 477 | GO:0002046 | GO:0010638 | GO:0008276      |
| 478 | GO:0001958 | GO:0010634 | ENSP00000361232 |
| 479 | GO:0000776 | GO:0010633 | GO:0016903      |
| 480 | GO:0000187 | GO:0010632 | GO:1901565      |
| 481 | hsa04080   | GO:0010631 | ENSP00000305207 |
| 482 | hsa00240   | GO:0010629 | ENSP00000305702 |
| 483 | GO:1901800 | GO:0010628 | GO:0006475      |
| 484 | GO:1901616 | GO:0010608 | ENSP00000303834 |
| 485 | GO:0060322 | GO:0010605 | GO:1900047      |
| 486 | GO:0051310 | GO:0010604 | ENSP00000384316 |
| 487 | GO:0051262 | GO:0010596 | GO:0051480      |
| 488 | GO:0051251 | GO:0010575 | ENSP00000272521 |
| 489 | GO:0050954 | GO:0010574 | GO:0003705      |
| 490 | GO:0050657 | GO:0010573 | GO:0034979      |
| 491 | GO:0048489 | GO:0010569 | hsa04080        |
| 492 | GO:0045787 | GO:0010564 | ENSP00000361010 |
| 493 | GO:0045721 | GO:0010563 | ENSP00000325203 |
| 494 | GO:0045334 | GO:0010562 | GO:0005747      |
| 495 | GO:0044445 | hsa04725   | GO:0006337      |
| 496 | GO:0044273 | GO:0010558 | GO:0008194      |
| 497 | GO:0043197 | GO:0010557 | GO:0043596      |
| 498 | GO:0042160 | GO:0010556 | ENSP00000301587 |
| 499 | GO:0035437 | GO:0010544 | ENSP00000350524 |
| 500 | GO:0035064 | GO:0010543 | GO:0032103      |
| 501 | GO:0033014 | GO:0010536 | ENSP00000310488 |
| 502 | GO:0032401 | GO:0010535 | GO:0006397      |
| 503 | GO:0031228 | GO:0010534 | GO:0034661      |
| 504 | GO:0030913 | GO:0010533 | GO:0044236      |
| 505 | GO:0030863 | GO:0010522 | GO:1901989      |
| 506 | GO:0019886 | hsa04724   | GO:0000104      |
| 507 | GO:0016925 | GO:0010518 | GO:1990837      |
| 508 | GO:0010638 | GO:0010517 | GO:0034723      |
| 509 | GO:0010256 | GO:0010510 | ENSP00000414514 |
| 510 | GO:0008610 | GO:0010506 | ENSP00000369728 |
| 511 | GO:0008289 | GO:0010501 | GO:0044724      |
| 512 | GO:0007586 | GO:0010498 | ENSP00000412483 |
| 513 | GO:0007218 | GO:0010468 | ENSP00000345163 |
| 514 | GO:0006779 | GO:0010467 | ENSP00000395187 |
| 515 | GO:0006621 | GO:0010466 | GO:0043687      |
| 516 | GO:0006508 | GO:0010455 | hsa04911        |
| 517 | GO:0006360 | GO:0010453 | GO:0044445      |
| 518 | GO:0006352 | GO:0010390 | GO:0071427      |
| 519 | GO:0006304 | GO:0010389 | ENSP00000278409 |
| 520 | GO:0006081 | GO:0010257 | GO:0071043      |
| 521 | GO:0005635 | GO:0010256 | GO:0015276      |
| 522 | GO:0004620 | GO:0010248 | GO:0070933      |
| 523 | GO:0004003 | GO:0010243 | GO:0051048      |
| 524 | GO:0003713 | GO:0010193 | GO:0016879      |
| 525 | GO:2000870 | GO:0010107 | ENSP00000264670 |
| 526 | GO:1902494 | GO:0010035 | GO:0051303      |

|     |            |            |                  |
|-----|------------|------------|------------------|
| 527 | GO:0098573 | GO:0010033 | GO:0061621       |
| 528 | GO:0097425 | GO:0009991 | ENSP000000352626 |
| 529 | GO:0072594 | GO:0009987 | ENSP000000322396 |
| 530 | GO:0071559 | GO:0009968 | GO:0007276       |
| 531 | GO:0070545 | GO:0009967 | GO:0009201       |
| 532 | GO:0060260 | GO:0009966 | ENSP000000274849 |
| 533 | GO:0060090 | GO:0009952 | GO:0019985       |
| 534 | GO:0051260 | GO:0009914 | GO:0001696       |
| 535 | GO:0051258 | GO:0009896 | GO:0044253       |
| 536 | GO:0050854 | GO:0009894 | ENSP000000307598 |
| 537 | GO:0050832 | hsa04713   | GO:0070901       |
| 538 | GO:0050830 | GO:0009893 | GO:0006403       |
| 539 | GO:0043433 | GO:0009892 | GO:0006766       |
| 540 | GO:0043230 | GO:0009891 | GO:0044784       |
| 541 | GO:0036498 | GO:0009890 | GO:1990542       |
| 542 | GO:0036124 | GO:0009889 | ENSP000000250937 |
| 543 | GO:0031256 | GO:0009888 | GO:0010510       |
| 544 | GO:0030397 | GO:0009887 | ENSP000000360492 |
| 545 | GO:0030140 | GO:0009792 | ENSP000000321506 |
| 546 | GO:0030041 | GO:0009790 | GO:0016740       |
| 547 | GO:0017124 | GO:0009746 | ENSP000000284690 |
| 548 | GO:0016836 | GO:0009743 | GO:0090329       |
| 549 | GO:0016589 | GO:0009725 | GO:0009303       |
| 550 | GO:0016324 | GO:0009719 | GO:0009064       |
| 551 | GO:0012506 | GO:0009653 | ENSP000000285600 |
| 552 | GO:0009247 | GO:0009636 | ENSP000000331815 |
| 553 | GO:0007063 | GO:0009628 | GO:0006066       |
| 554 | GO:0006996 | GO:0009620 | GO:0016469       |
| 555 | GO:0006959 | GO:0009617 | GO:0004591       |
| 556 | GO:0006475 | GO:0009612 | GO:0005184       |
| 557 | GO:0006006 | GO:0009611 | GO:0030574       |
| 558 | GO:0005669 | hsa04666   | ENSP000000323853 |
| 559 | GO:0004252 | GO:0009607 | ENSP000000260619 |
| 560 | GO:0002385 | GO:0009605 | GO:0008277       |
| 561 | GO:0001959 | GO:0009593 | GO:0044246       |
| 562 | GO:0000151 | GO:0009584 | GO:0022613       |
| 563 | hsa05010   | GO:0009583 | GO:0042769       |
| 564 | hsa03022   | GO:0009582 | ENSP000000343081 |
| 565 | GO:2000142 | GO:0009581 | GO:0048232       |
| 566 | GO:1990391 | GO:0009452 | GO:0008380       |
| 567 | GO:1901681 | GO:0009451 | GO:0002698       |
| 568 | GO:0098687 | GO:0009411 | ENSP000000263331 |
| 569 | GO:0097481 | hsa04662   | GO:0022836       |
| 570 | GO:0090151 | GO:0009410 | GO:0006805       |
| 571 | GO:0072686 | GO:0009404 | GO:0045841       |
| 572 | GO:0072372 | GO:0009396 | GO:0008191       |
| 573 | GO:0071840 | GO:0009312 | GO:0080171       |
| 574 | GO:0071682 | GO:0009311 | GO:0006814       |
| 575 | GO:0070603 | GO:0009306 | ENSP000000304188 |
| 576 | GO:0061418 | GO:0009303 | GO:1903532       |
| 577 | GO:0060261 | GO:0009268 | ENSP000000360329 |
| 578 | GO:0051904 | GO:0009260 | GO:0044281       |
| 579 | GO:0046782 | GO:0009259 | GO:0032436       |

|     |                 |            |                 |
|-----|-----------------|------------|-----------------|
| 580 | GO:0045765      | hsa04660   | GO:0005763      |
| 581 | GO:0035770      | GO:0009247 | GO:0002739      |
| 582 | GO:0033013      | GO:0009226 | GO:0019226      |
| 583 | GO:0032994      | GO:0009225 | GO:0046031      |
| 584 | GO:0031386      | GO:0009220 | ENSP00000326259 |
| 585 | GO:0031267      | GO:0009218 | GO:0048243      |
| 586 | GO:0031227      | GO:0009206 | GO:0006023      |
| 587 | GO:0031213      | GO:0009205 | ENSP00000260184 |
| 588 | GO:0031010      | GO:0009201 | ENSP00000233627 |
| 589 | GO:0030031      | GO:0009199 | ENSP00000285814 |
| 590 | GO:0030029      | GO:0009190 | GO:0002690      |
| 591 | GO:0019752      | GO:0009187 | GO:0000276      |
| 592 | GO:0016903      | GO:0009185 | ENSP00000311977 |
| 593 | GO:0009410      | GO:0009179 | GO:0000987      |
| 594 | GO:0009081      | GO:0009174 | GO:0006335      |
| 595 | GO:0008298      | GO:0009173 | ENSP00000319771 |
| 596 | GO:0008144      | GO:0009168 | ENSP00000255030 |
| 597 | GO:0006367      | GO:0009167 | GO:0022803      |
| 598 | GO:0006139      | GO:0009165 | GO:0016667      |
| 599 | GO:0005896      | GO:0009163 | GO:0009167      |
| 600 | GO:0005793      | GO:0009161 | GO:0034655      |
| 601 | GO:0005773      | hsa04630   | GO:0008610      |
| 602 | GO:0004842      | GO:0009156 | hsa05144        |
| 603 | GO:0003779      | GO:0009152 | GO:0008270      |
| 604 | GO:0003723      | GO:0009150 | GO:0007610      |
| 605 | GO:0000777      | GO:0009145 | GO:0015267      |
| 606 | ENSP00000295897 | GO:0009144 | ENSP00000238146 |
| 607 | GO:2000816      | GO:0009142 | GO:0000398      |
| 608 | GO:1901992      | GO:0009141 | GO:0000313      |
| 609 | GO:0090407      | GO:0009135 | ENSP00000407436 |
| 610 | GO:0070822      | GO:0009132 | GO:0051985      |
| 611 | GO:0061462      | GO:0009127 | GO:0007157      |
| 612 | GO:0051436      | GO:0009126 | GO:0007213      |
| 613 | GO:0051259      | GO:0009124 | GO:1903036      |
| 614 | GO:0051015      | GO:0009123 | GO:0044033      |
| 615 | GO:0050906      | GO:0009119 | ENSP00000306651 |
| 616 | GO:0048609      | GO:0009117 | GO:0019682      |
| 617 | GO:0048037      | GO:0009116 | ENSP00000262946 |
| 618 | GO:0046605      | GO:0009113 | ENSP00000377944 |
| 619 | GO:0046085      | GO:0009112 | GO:0016405      |
| 620 | GO:0045932      | GO:0009111 | GO:0033554      |
| 621 | GO:0045907      | GO:0009108 | GO:0004896      |
| 622 | GO:0045039      | GO:0009101 | GO:0006614      |
| 623 | GO:0043969      | GO:0009100 | GO:0006084      |
| 624 | GO:0043966      | GO:0009083 | ENSP00000373090 |
| 625 | GO:0043623      | GO:0009081 | GO:0031091      |
| 626 | GO:0043568      | GO:0009070 | GO:0005643      |
| 627 | GO:0043414      | GO:0009069 | GO:0035861      |
| 628 | GO:0042742      | GO:0009068 | GO:0006479      |
| 629 | GO:0035582      | GO:0009066 | ENSP00000411162 |
| 630 | GO:0033631      | GO:0009065 | GO:0031304      |
| 631 | GO:0033218      | GO:0009064 | GO:0001159      |
| 632 | GO:0031491      | hsa04611   | GO:0019856      |

|     |            |            |                 |
|-----|------------|------------|-----------------|
| 633 | GO:0031348 | GO:0009063 | GO:0097529      |
| 634 | GO:0030002 | GO:0009062 | GO:0098660      |
| 635 | GO:0019789 | GO:0009060 | ENSP00000278856 |
| 636 | GO:0019228 | GO:0009059 | hsa00330        |
| 637 | GO:0017004 | GO:0009058 | GO:0006720      |
| 638 | GO:0016853 | GO:0009057 | ENSP00000313953 |
| 639 | GO:0016811 | GO:0009056 | GO:0030803      |
| 640 | GO:0016620 | GO:0008652 | GO:0006154      |
| 641 | GO:0016363 | GO:0008610 | GO:0051272      |
| 642 | GO:0016328 | GO:0008585 | GO:0051046      |
| 643 | GO:0016266 | GO:0008584 | GO:0070987      |
| 644 | GO:0015081 | GO:0008544 | ENSP00000261637 |
| 645 | GO:0010716 | GO:0008542 | ENSP00000410530 |
| 646 | GO:0010467 | GO:0008535 | GO:0009410      |
| 647 | GO:0009593 | GO:0008406 | GO:0052472      |
| 648 | GO:0009070 | GO:0008380 | GO:0006775      |
| 649 | GO:0008380 | GO:0008361 | GO:0002673      |
| 650 | GO:0008023 | GO:0008360 | GO:0043161      |
| 651 | GO:0006650 | GO:0008344 | GO:0050802      |
| 652 | GO:0006354 | GO:0008334 | GO:0046132      |
| 653 | GO:0005884 | GO:0008300 | GO:0034724      |
| 654 | GO:0005096 | GO:0008299 | GO:0005622      |
| 655 | GO:0003714 | GO:0008298 | GO:0043487      |
| 656 | GO:0002227 | GO:0008286 | GO:0016278      |
| 657 | GO:0001227 | GO:0008285 | GO:0030809      |
| 658 | GO:0001205 | GO:0008284 | hsa05323        |
| 659 | GO:0001104 | GO:0008283 | GO:0033558      |
| 660 | GO:0001098 | GO:0008277 | GO:0000775      |
| 661 | GO:0000779 | GO:0008219 | ENSP00000323424 |
| 662 | GO:0000276 | GO:0008217 | GO:0050909      |
| 663 | hsa05200   | GO:0008213 | GO:1902224      |
| 664 | hsa05100   | GO:0008211 | GO:0004812      |
| 665 | hsa04962   | GO:0008210 | GO:0030705      |
| 666 | hsa04742   | GO:0008209 | GO:0031253      |
| 667 | GO:1904018 | GO:0008206 | GO:0061029      |
| 668 | GO:0099565 | GO:0008203 | GO:1903311      |
| 669 | GO:0098798 | GO:0008202 | ENSP00000365806 |
| 670 | GO:0090195 | GO:0008154 | GO:0044205      |
| 671 | GO:0086001 | GO:0008152 | ENSP00000396441 |
| 672 | GO:0075733 | GO:0008150 | GO:1902806      |
| 673 | GO:0072329 | GO:0008105 | GO:1990351      |
| 674 | GO:0070382 | GO:0008104 | GO:0002719      |
| 675 | GO:0051668 | GO:0008064 | GO:0018024      |
| 676 | GO:0051494 | GO:0008037 | GO:0050684      |
| 677 | GO:0051236 | GO:0008033 | GO:0007077      |
| 678 | GO:0050890 | GO:0008016 | GO:0019058      |
| 679 | GO:0050856 | GO:0008015 | GO:1902911      |
| 680 | GO:0050789 | GO:0007635 | ENSP00000409367 |
| 681 | GO:0050673 | GO:0007632 | GO:0044433      |
| 682 | GO:0050000 | GO:0007631 | GO:0030170      |
| 683 | GO:0046847 | GO:0007628 | ENSP00000412251 |
| 684 | GO:0045171 | GO:0007626 | GO:0002688      |
| 685 | GO:0044306 | GO:0007612 | ENSP00000264998 |

|     |                 |            |                 |
|-----|-----------------|------------|-----------------|
| 686 | GO:0042771      | GO:0007611 | ENSP00000403576 |
| 687 | GO:0042054      | GO:0007610 | GO:0044450      |
| 688 | GO:0038165      | GO:0007608 | GO:0090544      |
| 689 | GO:0035887      | GO:0007606 | GO:0051339      |
| 690 | GO:0034702      | GO:0007603 | GO:0006778      |
| 691 | GO:0032991      | GO:0007602 | GO:0004775      |
| 692 | GO:0032870      | GO:0007600 | GO:0090545      |
| 693 | GO:0032507      | hsa04510   | GO:0006954      |
| 694 | GO:0032480      | GO:0007599 | GO:0015078      |
| 695 | GO:0031982      | GO:0007597 | GO:0007095      |
| 696 | GO:0031981      | GO:0007596 | GO:0099513      |
| 697 | GO:0031937      | GO:0007588 | GO:0008320      |
| 698 | GO:0031513      | GO:0007586 | GO:0005775      |
| 699 | GO:0031406      | GO:0007584 | GO:0006541      |
| 700 | GO:0030880      | GO:0007571 | GO:0016324      |
| 701 | GO:0022607      | GO:0007568 | GO:0016705      |
| 702 | GO:0021545      | GO:0007566 | GO:0044702      |
| 703 | GO:0019838      | GO:0007565 | GO:0006613      |
| 704 | GO:0019731      | hsa04360   | ENSP00000253107 |
| 705 | GO:0016860      | GO:0007548 | hsa00650        |
| 706 | GO:0016741      | GO:0007507 | GO:0003729      |
| 707 | GO:0016667      | GO:0007492 | GO:1903362      |
| 708 | GO:0016247      | GO:0007435 | GO:0010466      |
| 709 | GO:0015721      | GO:0007431 | GO:0043623      |
| 710 | GO:0015030      | GO:0007420 | GO:0005765      |
| 711 | GO:0009581      | GO:0007411 | GO:0051570      |
| 712 | GO:0008603      | GO:0007409 | GO:0043632      |
| 713 | GO:0008514      | GO:0007399 | GO:0016032      |
| 714 | GO:0007213      | GO:0007369 | GO:0016887      |
| 715 | GO:0007186      | GO:0007346 | GO:0009132      |
| 716 | GO:0007030      | GO:0007289 | GO:1903531      |
| 717 | GO:0007018      | GO:0007283 | GO:0005216      |
| 718 | GO:0006612      | GO:0007276 | GO:0016259      |
| 719 | GO:0006595      | GO:0007275 | GO:0005721      |
| 720 | GO:0006488      | GO:0007270 | GO:0000459      |
| 721 | GO:0006333      | GO:0007269 | GO:1901607      |
| 722 | GO:0004722      | GO:0007268 | GO:0016023      |
| 723 | GO:0004703      | GO:0007267 | GO:0016747      |
| 724 | GO:0003677      | GO:0007266 | GO:0044057      |
| 725 | GO:0001975      | GO:0007265 | GO:0016765      |
| 726 | GO:0000118      | GO:0007264 | ENSP00000281701 |
| 727 | ENSP00000386884 | GO:0007260 | GO:0031279      |
| 728 | ENSP00000276585 | GO:0007259 | GO:0042573      |
| 729 | ENSP00000253107 | GO:0007229 | GO:0061733      |
| 730 | ENSP00000225402 | GO:0007220 | GO:0030595      |
| 731 | hsa05166        | GO:0007219 | ENSP00000221801 |
| 732 | hsa04120        | GO:0007218 | GO:0016746      |
| 733 | hsa03015        | GO:0007215 | GO:0032967      |
| 734 | GO:1904035      | GO:0007213 | GO:0000175      |
| 735 | GO:1903902      | GO:0007212 | ENSP00000407401 |
| 736 | GO:1903309      | GO:0007210 | ENSP00000297873 |
| 737 | GO:1902554      | GO:0007205 | GO:0044764      |
| 738 | GO:1901881      | GO:0007204 | GO:0000062      |

|     |            |            |                 |
|-----|------------|------------|-----------------|
| 739 | GO:0071987 | GO:0007202 | GO:0071674      |
| 740 | GO:0060191 | GO:0007200 | GO:0051169      |
| 741 | GO:0055067 | GO:0007194 | GO:0016709      |
| 742 | GO:0055037 | GO:0007193 | GO:0016620      |
| 743 | GO:0051270 | GO:0007191 | GO:0044708      |
| 744 | GO:0051238 | GO:0007190 | ENSP00000345793 |
| 745 | GO:0050435 | hsa04261   | GO:0006457      |
| 746 | GO:0048385 | GO:0007189 | GO:0002701      |
| 747 | GO:0046822 | GO:0007188 | GO:0015672      |
| 748 | GO:0045176 | GO:0007187 | GO:0072594      |
| 749 | GO:0045055 | GO:0007186 | GO:0042054      |
| 750 | GO:0044724 | GO:0007179 | GO:0046906      |
| 751 | GO:0044421 | GO:0007178 | GO:0006418      |
| 752 | GO:0043410 | GO:0007173 | GO:0006171      |
| 753 | GO:0035590 | GO:0007169 | GO:0016486      |
| 754 | GO:0034714 | GO:0007167 | GO:0019941      |
| 755 | GO:0034330 | GO:0007166 | GO:0045202      |
| 756 | GO:0033365 | GO:0007165 | GO:0045177      |
| 757 | GO:0032456 | GO:0007164 | GO:0005178      |
| 758 | GO:0032259 | GO:0007163 | GO:0030808      |
| 759 | GO:0031901 | GO:0007162 | GO:0044257      |
| 760 | GO:0031826 | GO:0007160 | GO:0032786      |
| 761 | GO:0031573 | GO:0007159 | GO:0031490      |
| 762 | GO:0030669 | GO:0007157 | ENSP00000278407 |
| 763 | GO:0030534 | GO:0007155 | GO:0004497      |
| 764 | GO:0030258 | GO:0007154 | GO:0016875      |
| 765 | GO:0030141 | GO:0007131 | GO:0031428      |
| 766 | GO:0022618 | GO:0007127 | GO:0050886      |
| 767 | GO:0019213 | GO:0007126 | GO:0000779      |
| 768 | GO:0016597 | GO:0007099 | GO:0001046      |
| 769 | GO:0015850 | GO:0007098 | GO:0007020      |
| 770 | GO:0010533 | GO:0007097 | GO:0023061      |
| 771 | GO:0010506 | GO:0007095 | GO:0044421      |
| 772 | GO:0009411 | GO:0007094 | GO:0000781      |
| 773 | GO:0009100 | GO:0007093 | GO:0042770      |
| 774 | GO:0008171 | GO:0007091 | GO:0030799      |
| 775 | GO:0007600 | GO:0007088 | GO:0007099      |
| 776 | GO:0007157 | GO:0007077 | GO:0072677      |
| 777 | GO:0007064 | GO:0007067 | ENSP00000246802 |
| 778 | GO:0007020 | GO:0007064 | ENSP00000345895 |
| 779 | GO:0006793 | GO:0007063 | GO:0098852      |
| 780 | GO:0006720 | GO:0007062 | GO:0020037      |
| 781 | GO:0006383 | GO:0007059 | GO:0030814      |
| 782 | GO:0006364 | GO:0007052 | GO:0031985      |
| 783 | GO:0005912 | GO:0007051 | ENSP00000419740 |
| 784 | GO:0005905 | GO:0007050 | GO:0000725      |
| 785 | GO:0005797 | GO:0007049 | GO:0016748      |
| 786 | GO:0005749 | GO:0007045 | ENSP00000402733 |
| 787 | GO:0005104 | GO:0007044 | GO:0016885      |
| 788 | GO:0004872 | GO:0007043 | GO:0097530      |
| 789 | GO:0002504 | GO:0007041 | GO:0070330      |
| 790 | GO:0001649 | GO:0007040 | GO:0031410      |
| 791 | GO:0001540 | GO:0007034 | ENSP00000403536 |

|     |            |            |                 |
|-----|------------|------------|-----------------|
| 792 | GO:0001510 | GO:0007033 | GO:0009165      |
| 793 | GO:0000981 | GO:0007032 | GO:0022411      |
| 794 | GO:0000152 | GO:0007031 | GO:0014910      |
| 795 | hsa04730   | GO:0007030 | ENSP00000390722 |
| 796 | hsa04728   | GO:0007020 | GO:0019725      |
| 797 | hsa04623   | GO:0007018 | GO:0043425      |
| 798 | hsa04062   | GO:0007017 | GO:0000096      |
| 799 | hsa00020   | GO:0007015 | GO:1902847      |
| 800 | GO:1903034 | GO:0007010 | GO:0006940      |
| 801 | GO:1903008 | GO:0007009 | GO:0043484      |
| 802 | GO:1901998 | GO:0007007 | GO:0005813      |
| 803 | GO:1901565 | GO:0007006 | GO:1900046      |
| 804 | GO:0098813 | GO:0007005 | GO:0046467      |
| 805 | GO:0097502 | GO:0007000 | GO:0010498      |
| 806 | GO:0090002 | GO:0006999 | GO:0009190      |
| 807 | GO:0070230 | GO:0006998 | GO:0000380      |
| 808 | GO:0061136 | GO:0006997 | GO:0032155      |
| 809 | GO:0051537 | GO:0006996 | GO:0070525      |
| 810 | GO:0051233 | GO:0006986 | GO:0098655      |
| 811 | GO:0050871 | GO:0006982 | GO:0007050      |
| 812 | GO:0050795 | GO:0006979 | GO:0016103      |
| 813 | GO:0045453 | GO:0006978 | GO:0046058      |
| 814 | GO:0045121 | GO:0006977 | GO:0003006      |
| 815 | GO:0045022 | GO:0006974 | hsa04020        |
| 816 | GO:0044702 | GO:0006965 | ENSP00000380495 |
| 817 | GO:0044699 | GO:0006963 | GO:0051786      |
| 818 | GO:0044440 | GO:0006959 | GO:0005179      |
| 819 | GO:0044297 | GO:0006958 | ENSP00000386134 |
| 820 | GO:0043596 | GO:0006957 | GO:0045787      |
| 821 | GO:0043129 | GO:0006956 | ENSP00000365837 |
| 822 | GO:0042599 | GO:0006955 | GO:0044456      |
| 823 | GO:0042310 | GO:0006954 | GO:0032413      |
| 824 | GO:0042277 | GO:0006953 | GO:0007155      |
| 825 | GO:0042157 | GO:0006952 | GO:0000959      |
| 826 | GO:0035412 | GO:0006950 | ENSP00000355565 |
| 827 | GO:0034329 | GO:0006940 | GO:1900086      |
| 828 | GO:0032420 | GO:0006939 | GO:1901070      |
| 829 | GO:0031700 | GO:0006937 | GO:0051234      |
| 830 | GO:0031640 | GO:0006936 | ENSP00000321449 |
| 831 | GO:0030684 | GO:0006935 | GO:1901293      |
| 832 | GO:0030594 | GO:0006933 | GO:0008584      |
| 833 | GO:0030136 | GO:0006931 | GO:0010951      |
| 834 | GO:0019884 | GO:0006929 | GO:1902579      |
| 835 | GO:0019882 | GO:0006928 | GO:0045211      |
| 836 | GO:0018027 | GO:0006915 | GO:0071478      |
| 837 | GO:0018023 | GO:0006914 | GO:0015297      |
| 838 | GO:0016887 | GO:0006913 | GO:0035587      |
| 839 | GO:0016835 | GO:0006909 | GO:0010256      |
| 840 | GO:0016779 | GO:0006904 | ENSP00000315674 |
| 841 | GO:0016655 | GO:0006901 | GO:0031907      |
| 842 | GO:0016405 | GO:0006900 | GO:0050880      |
| 843 | GO:0016074 | GO:0006898 | hsa05204        |
| 844 | GO:0016071 | GO:0006897 | GO:0070585      |



|     |            |            |                 |
|-----|------------|------------|-----------------|
| 845 | GO:0016070 | GO:0006892 | GO:0050818      |
| 846 | GO:0016053 | GO:0006888 | GO:0070603      |
| 847 | GO:0015108 | GO:0006887 | GO:0033047      |
| 848 | GO:0009987 | GO:0006886 | GO:0035258      |
| 849 | GO:0009790 | GO:0006885 | GO:0000451      |
| 850 | GO:0009055 | GO:0006884 | GO:1903522      |
| 851 | GO:0008757 | GO:0006883 | GO:0007018      |
| 852 | GO:0008509 | GO:0006875 | GO:0030815      |
| 853 | GO:0008299 | GO:0006874 | GO:0032501      |
| 854 | GO:0007032 | GO:0006873 | GO:0000166      |
| 855 | GO:0007006 | GO:0006869 | GO:1902583      |
| 856 | GO:0006952 | GO:0006865 | hsa00601        |
| 857 | GO:0006857 | GO:0006863 | hsa04723        |
| 858 | GO:0006338 | GO:0006857 | GO:0090068      |
| 859 | GO:0006323 | GO:0006839 | GO:0005793      |
| 860 | GO:0006029 | GO:0006836 | GO:0005774      |
| 861 | GO:0005840 | GO:0006835 | GO:0070851      |
| 862 | GO:0005790 | GO:0006833 | GO:0035267      |
| 863 | GO:0005737 | GO:0006821 | GO:0043230      |
| 864 | GO:0005720 | GO:0006820 | GO:0042310      |
| 865 | GO:0005719 | GO:0006818 | GO:0016712      |
| 866 | GO:0005546 | hsa04072   | GO:0010569      |
| 867 | GO:0003938 | GO:0006816 | GO:0051438      |
| 868 | GO:0003735 | GO:0006814 | GO:0098754      |
| 869 | GO:0002831 | GO:0006813 | GO:0007189      |
| 870 | GO:0002702 | GO:0006812 | GO:0051179      |
| 871 | GO:0002495 | GO:0006811 | ENSP00000344818 |
| 872 | GO:0002064 | GO:0006810 | hsa04514        |
| 873 | GO:0001650 | GO:0006807 | ENSP00000225402 |
| 874 | GO:0000380 | GO:0006805 | GO:0046605      |
| 875 | GO:0000138 | GO:0006796 | GO:0017111      |
| 876 | GO:0000049 | GO:0006793 | GO:0015919      |
| 877 | hsa04961   | hsa04071   | GO:1902653      |
| 878 | hsa04360   | GO:0006790 | GO:1903052      |
| 879 | hsa04260   | GO:0006784 | GO:0031935      |
| 880 | hsa04024   | GO:0006781 | hsa05150        |
| 881 | hsa04020   | GO:0006780 | GO:0006821      |
| 882 | hsa04014   | GO:0006779 | GO:0015631      |
| 883 | GO:1903793 | GO:0006778 | GO:0051049      |
| 884 | GO:1903725 | GO:0006775 | GO:1903364      |
| 885 | GO:1903651 | GO:0006767 | GO:0015291      |
| 886 | GO:1902600 | GO:0006766 | GO:0048771      |
| 887 | GO:1901605 | GO:0006757 | GO:0004303      |
| 888 | GO:1901361 | GO:0006754 | GO:0046883      |
| 889 | GO:0098797 | GO:0006753 | GO:0051298      |
| 890 | GO:0098754 | GO:0006749 | GO:0090537      |
| 891 | GO:0098631 | GO:0006744 | GO:0009111      |
| 892 | GO:0090022 | GO:0006743 | GO:0042625      |
| 893 | GO:0072509 | GO:0006739 | GO:0050830      |
| 894 | GO:0072384 | GO:0006735 | GO:0001523      |
| 895 | GO:0071320 | GO:0006734 | GO:0033365      |
| 896 | GO:0070844 | GO:0006733 | GO:0042391      |
| 897 | GO:0060205 | GO:0006732 | GO:0098869      |

|     |            |            |                 |
|-----|------------|------------|-----------------|
| 898 | GO:0052689 | GO:0006725 | GO:0032589      |
| 899 | GO:0051567 | GO:0006721 | GO:0098868      |
| 900 | GO:0051092 | GO:0006720 | hsa00380        |
| 901 | GO:0050748 | GO:0006706 | GO:0033260      |
| 902 | GO:0046872 | GO:0006705 | ENSP00000352839 |
| 903 | GO:0046658 | GO:0006704 | GO:0003095      |
| 904 | GO:0046579 | GO:0006703 | GO:0072659      |
| 905 | GO:0046112 | GO:0006702 | GO:0044403      |
| 906 | GO:0045446 | GO:0006701 | GO:0005773      |
| 907 | GO:0045178 | GO:0006700 | GO:0007162      |
| 908 | GO:0044463 | GO:0006699 | hsa04726        |
| 909 | GO:0044444 | GO:0006695 | GO:0016050      |
| 910 | GO:0043574 | GO:0006694 | GO:0009582      |
| 911 | GO:0042995 | GO:0006690 | GO:0010455      |
| 912 | GO:0042058 | GO:0006664 | GO:0072678      |
| 913 | GO:0035563 | GO:0006650 | GO:0003684      |
| 914 | GO:0034250 | GO:0006644 | GO:0019825      |
| 915 | GO:0033116 | GO:0006643 | GO:1900048      |
| 916 | GO:0032279 | GO:0006637 | GO:0016115      |
| 917 | GO:0031896 | GO:0006635 | GO:0006096      |
| 918 | GO:0031570 | hsa04024   | GO:0048608      |
| 919 | GO:0030818 | GO:0006631 | GO:0046040      |
| 920 | GO:0030175 | GO:0006629 | GO:0044419      |
| 921 | GO:0030166 | GO:0006626 | ENSP00000258743 |
| 922 | GO:0030163 | GO:0006625 | GO:0030659      |
| 923 | GO:0022408 | GO:0006621 | GO:0000791      |
| 924 | GO:0019901 | GO:0006614 | hsa00500        |
| 925 | GO:0019722 | GO:0006613 | GO:0002548      |
| 926 | GO:0018205 | GO:0006612 | GO:0070062      |
| 927 | GO:0018200 | GO:0006606 | GO:0032559      |
| 928 | GO:0018196 | GO:0006605 | GO:0070613      |
| 929 | GO:0017056 | hsa04022   | GO:0016247      |
| 930 | GO:0016628 | GO:0006595 | hsa00514        |
| 931 | GO:0015078 | GO:0006575 | GO:0050679      |
| 932 | GO:0010876 | GO:0006554 | ENSP00000413572 |
| 933 | GO:0009132 | GO:0006553 | GO:0016860      |
| 934 | GO:0008584 | GO:0006551 | ENSP00000223095 |
| 935 | GO:0008344 | GO:0006544 | hsa04971        |
| 936 | GO:0008154 | GO:0006541 | GO:0000963      |
| 937 | GO:0008105 | GO:0006520 | GO:0061302      |
| 938 | GO:0008064 | GO:0006518 | GO:1902554      |
| 939 | GO:0007608 | GO:0006516 | GO:0016328      |
| 940 | GO:0007268 | GO:0006513 | hsa03040        |
| 941 | GO:0007062 | GO:0006511 | GO:0065010      |
| 942 | GO:0007059 | GO:0006509 | GO:0072577      |
| 943 | GO:0006457 | GO:0006508 | GO:0032465      |
| 944 | GO:0006400 | GO:0006493 | GO:0051340      |
| 945 | GO:0006361 | GO:0006490 | GO:0030425      |
| 946 | GO:0006022 | GO:0006488 | GO:0015698      |
| 947 | GO:0005903 | GO:0006487 | GO:0007010      |
| 948 | GO:0005732 | GO:0006486 | GO:0051546      |
| 949 | GO:0004888 | GO:0006482 | GO:0018685      |
| 950 | GO:0004871 | hsa04015   | GO:0031122      |

|      |                 |            |                  |
|------|-----------------|------------|------------------|
| 951  | GO:0004739      | GO:0006479 | GO:1901617       |
| 952  | GO:0003729      | GO:0006476 | GO:0008023       |
| 953  | GO:0002940      | GO:0006475 | GO:0071013       |
| 954  | GO:0002070      | GO:0006474 | GO:0006886       |
| 955  | GO:0001917      | GO:0006473 | GO:0051050       |
| 956  | GO:0001652      | GO:0006470 | GO:0051538       |
| 957  | GO:0001306      | GO:0006468 | GO:0051983       |
| 958  | GO:0001078      | GO:0006465 | GO:0033143       |
| 959  | GO:0000819      | GO:0006464 | GO:0030424       |
| 960  | GO:0000793      | GO:0006461 | GO:0030194       |
| 961  | GO:0000791      | GO:0006457 | GO:0006749       |
| 962  | GO:0000785      | GO:0006450 | GO:0045178       |
| 963  | ENSP00000009180 | GO:0006446 | GO:0044441       |
| 964  | hsa04724        | GO:0006418 | GO:2000401       |
| 965  | hsa04614        | GO:0006417 | GO:0046365       |
| 966  | hsa04611        | GO:0006415 | GO:0008375       |
| 967  | hsa04514        | GO:0006414 | GO:0001974       |
| 968  | hsa04151        | GO:0006413 | GO:0072657       |
| 969  | hsa00590        | GO:0006412 | GO:0036440       |
| 970  | GO:1903649      | GO:0006409 | GO:0050819       |
| 971  | GO:1903305      | GO:0006406 | hsa05034         |
| 972  | GO:1901981      | GO:0006405 | GO:0040017       |
| 973  | GO:1901661      | GO:0006403 | GO:0005261       |
| 974  | GO:1900424      | GO:0006402 | GO:0009792       |
| 975  | GO:0098534      | GO:0006401 | GO:0072522       |
| 976  | GO:0090568      | GO:0006400 | GO:0015294       |
| 977  | GO:0090101      | GO:0006399 | GO:0003008       |
| 978  | GO:0072583      | GO:0006397 | GO:1901571       |
| 979  | GO:0072378      | GO:0006396 | GO:0005244       |
| 980  | GO:0072321      | GO:0006391 | GO:0004857       |
| 981  | GO:0071804      | GO:0006390 | GO:0016725       |
| 982  | GO:0071426      | GO:0006383 | hsa00350         |
| 983  | GO:0071168      | GO:0006370 | GO:0072676       |
| 984  | GO:0071103      | GO:0006369 | GO:0022838       |
| 985  | GO:0070491      | GO:0006368 | GO:0006625       |
| 986  | GO:0070011      | GO:0006367 | ENSP000000370473 |
| 987  | GO:0060326      | GO:0006366 | GO:0000287       |
| 988  | GO:0055108      | GO:0006364 | GO:0008187       |
| 989  | GO:0051536      | GO:0006363 | GO:0006816       |
| 990  | GO:0051348      | GO:0006362 | GO:0009451       |
| 991  | GO:0051345      | GO:0006361 | GO:0008406       |
| 992  | GO:0051298      | GO:0006360 | GO:0035242       |
| 993  | GO:0051289      | GO:0006357 | GO:0051260       |
| 994  | GO:0050714      | GO:0006355 | GO:0019953       |
| 995  | GO:0050660      | GO:0006354 | GO:2000779       |
| 996  | GO:0046794      | GO:0006353 | GO:0035725       |
| 997  | GO:0046718      | GO:0006352 | ENSP000000218388 |
| 998  | GO:0045921      | GO:0006351 | GO:0006006       |
| 999  | GO:0045216      | GO:0006344 | GO:0006612       |
| 1000 | GO:0043601      | GO:0006342 | GO:0009897       |
| 1001 | GO:0043531      | GO:0006338 | GO:0043574       |
| 1002 | GO:0043488      | GO:0006337 | GO:0045661       |
| 1003 | GO:0043487      | GO:0006336 | GO:0046785       |

|      |            |                 |                 |
|------|------------|-----------------|-----------------|
| 1004 | GO:0042440 | GO:0006335      | GO:0016192      |
| 1005 | GO:0040029 | GO:0006334      | ENSP00000343505 |
| 1006 | GO:0034976 | GO:0006333      | GO:1902652      |
| 1007 | GO:0031968 | GO:0006325      | GO:0015696      |
| 1008 | GO:0031748 | ENSP00000395046 | GO:2000146      |
| 1009 | GO:0031588 | ENSP00000387523 | GO:0005739      |
| 1010 | GO:0031519 | ENSP00000386884 | GO:0022832      |
| 1011 | GO:0031498 | GO:0006323      | GO:0006278      |
| 1012 | GO:0030705 | ENSP00000382166 | GO:1903312      |
| 1013 | GO:0030662 | ENSP00000380153 | GO:0044786      |
| 1014 | GO:0023058 | GO:0006310      | GO:0016776      |
| 1015 | GO:0017016 | ENSP00000377799 | GO:0001878      |
| 1016 | GO:0016829 | GO:0006306      | GO:1902562      |
| 1017 | GO:0016601 | ENSP00000371377 | GO:0043009      |
| 1018 | GO:0016298 | ENSP00000369728 | GO:0031396      |
| 1019 | GO:0016241 | ENSP00000369647 | GO:0016126      |
| 1020 | GO:0015992 | ENSP00000368989 | GO:0051817      |
| 1021 | GO:0015872 | GO:0006305      | GO:0051053      |
| 1022 | GO:0015026 | GO:0006304      | hsa05321        |
| 1023 | GO:0009069 | ENSP00000365663 | GO:0017022      |
| 1024 | GO:0009060 | ENSP00000362795 | GO:0000138      |
| 1025 | GO:0008187 | GO:0006303      | GO:0070977      |
| 1026 | GO:0007631 | GO:0006302      | GO:0006813      |
| 1027 | GO:0007165 | GO:0006301      | GO:0006364      |
| 1028 | GO:0007127 | GO:0006297      | GO:1903707      |
| 1029 | GO:0006957 | ENSP00000352626 | GO:0019318      |
| 1030 | GO:0006936 | GO:0006290      | GO:0008299      |
| 1031 | GO:0006931 | ENSP00000350256 | GO:0045137      |
| 1032 | GO:0006813 | ENSP00000350003 | GO:0019787      |
| 1033 | GO:0006766 | GO:0006289      | GO:0086012      |
| 1034 | GO:0006605 | ENSP00000345317 | GO:0000307      |
| 1035 | GO:0006283 | ENSP00000345163 | ENSP00000263341 |
| 1036 | GO:0006270 | GO:0006284      | GO:0002943      |
| 1037 | GO:0006119 | ENSP00000343505 | GO:0009411      |
| 1038 | GO:0005924 | ENSP00000334364 | GO:0006140      |
| 1039 | GO:0005798 | GO:0006283      | GO:1902807      |
| 1040 | GO:0005791 | ENSP00000332659 | GO:0005681      |
| 1041 | GO:0005758 | GO:0006282      | GO:0043005      |
| 1042 | GO:0005747 | ENSP00000330384 | GO:0007492      |
| 1043 | GO:0005488 | ENSP00000330049 | ENSP00000350003 |
| 1044 | GO:0005254 | ENSP00000328563 | GO:0004582      |
| 1045 | GO:0005109 | ENSP00000327585 | GO:0016101      |
| 1046 | GO:0004857 | GO:0006281      | GO:0006885      |
| 1047 | GO:0004582 | ENSP00000324769 | GO:0030513      |
| 1048 | GO:0003727 | ENSP00000324251 | hsa04727        |
| 1049 | GO:0003015 | GO:0006278      | GO:0015629      |
| 1050 | GO:0002479 | ENSP00000323853 | GO:0016820      |
| 1051 | GO:0002440 | ENSP00000322939 | GO:0002697      |
| 1052 | GO:0002032 | ENSP00000321506 | GO:0045596      |
| 1053 | GO:0001990 | GO:0006271      | ENSP00000001146 |
| 1054 | GO:0001890 | ENSP00000321426 | GO:0070405      |
| 1055 | GO:0001845 | GO:0006270      | GO:0015293      |
| 1056 | GO:0000287 | GO:0006261      | GO:0005527      |

|      |                 |                 |                 |
|------|-----------------|-----------------|-----------------|
| 1057 | GO:0000079      | ENSP00000310488 | GO:0032879      |
| 1058 | GO:0000003      | ENSP00000309673 | GO:0001833      |
| 1059 | ENSP00000382166 | GO:0006260      | GO:0048705      |
| 1060 | hsa05130        | ENSP00000308270 | GO:0070129      |
| 1061 | hsa04530        | ENSP00000307598 | GO:0045861      |
| 1062 | hsa04071        | GO:0006259      | GO:0051208      |
| 1063 | hsa03008        | ENSP00000305207 | GO:0006888      |
| 1064 | hsa00100        | ENSP00000303864 | GO:0048531      |
| 1065 | hsa00030        | GO:0006222      | GO:0071622      |
| 1066 | GO:2001027      | ENSP00000303834 | GO:0051170      |
| 1067 | GO:2000649      | ENSP00000302665 | GO:0006810      |
| 1068 | GO:1903313      | ENSP00000300773 | GO:0005911      |
| 1069 | GO:1903311      | GO:0006189      | GO:0032412      |
| 1070 | GO:1903078      | ENSP00000297439 | GO:0051270      |
| 1071 | GO:1900120      | GO:0006188      | GO:0010522      |
| 1072 | GO:0098858      | ENSP00000295453 | ENSP00000350011 |
| 1073 | GO:0098800      | ENSP00000292301 | GO:0048193      |
| 1074 | GO:0097178      | GO:0006177      | GO:0022414      |
| 1075 | GO:0090307      | ENSP00000278409 | GO:0046914      |
| 1076 | GO:0090150      | GO:0006171      | GO:0035639      |
| 1077 | GO:0072577      | GO:0006167      | GO:0044877      |
| 1078 | GO:0072331      | GO:0006165      | GO:1990748      |
| 1079 | GO:0072330      | ENSP00000263341 | GO:0016064      |
| 1080 | GO:0071695      | ENSP00000263339 | GO:0000209      |
| 1081 | GO:0071564      | ENSP00000263321 | hsa04970        |
| 1082 | GO:0071535      | GO:0006164      | GO:0099565      |
| 1083 | GO:0071384      | GO:0006163      | GO:1901990      |
| 1084 | GO:0071322      | GO:0006154      | ENSP00000249075 |
| 1085 | GO:0061659      | GO:0006152      | GO:0044437      |
| 1086 | GO:0060589      | ENSP00000249887 | GO:0001882      |
| 1087 | GO:0055119      | ENSP00000249075 | GO:0007160      |
| 1088 | GO:0051568      | ENSP00000244623 | GO:0006997      |
| 1089 | GO:0051461      | GO:0006144      | GO:0086001      |
| 1090 | GO:0051220      | GO:0006140      | GO:0045165      |
| 1091 | GO:0051050      | GO:0006139      | GO:1903050      |
| 1092 | GO:0051001      | ENSP00000216492 | GO:0006290      |
| 1093 | GO:0050654      | GO:0006123      | GO:0090002      |
| 1094 | GO:0046909      | ENSP00000165524 | GO:0051171      |
| 1095 | GO:0046907      | ENSP00000009180 | GO:0050900      |
| 1096 | GO:0046165      | GO:1990837      | GO:0000460      |
| 1097 | GO:0045329      | GO:1990583      | GO:0015849      |
| 1098 | GO:0045046      | GO:1904929      | ENSP00000264498 |
| 1099 | GO:0044802      | GO:1902936      | GO:0031573      |
| 1100 | GO:0044763      | GO:1901981      | GO:1900084      |
| 1101 | GO:0044710      | GO:0006122      | GO:0032550      |
| 1102 | GO:0044085      | GO:1901681      | GO:0009790      |
| 1103 | GO:0043923      | GO:1901363      | GO:0050730      |
| 1104 | GO:0043902      | GO:1901265      | GO:0009311      |
| 1105 | GO:0043235      | GO:0099600      | GO:2000112      |
| 1106 | GO:0043169      | GO:0099528      | GO:0050708      |
| 1107 | GO:0043152      | GO:0099516      | GO:0061134      |
| 1108 | GO:0042623      | GO:0098811      | ENSP00000338548 |
| 1109 | GO:0042398      | GO:0098772      | GO:0042383      |

|      |            |            |                 |
|------|------------|------------|-----------------|
| 1110 | GO:0042162 | GO:0098631 | GO:0034654      |
| 1111 | GO:0034774 | GO:0097472 | GO:0032553      |
| 1112 | GO:0033198 | GO:0006120 | GO:0045807      |
| 1113 | GO:0033036 | GO:0097367 | GO:0034705      |
| 1114 | GO:0032755 | GO:0097159 | GO:0009952      |
| 1115 | GO:0032689 | GO:0097110 | GO:0009620      |
| 1116 | GO:0031100 | GO:0072509 | GO:0060986      |
| 1117 | GO:0030176 | GO:0071987 | GO:0032774      |
| 1118 | GO:0030165 | GO:0071936 | GO:0006643      |
| 1119 | GO:0019840 | GO:0071837 | hsa04141        |
| 1120 | GO:0019787 | GO:0071535 | GO:0097659      |
| 1121 | GO:0019674 | GO:0070851 | GO:0006351      |
| 1122 | GO:0018195 | GO:0070742 | GO:0006551      |
| 1123 | GO:0017144 | GO:0006119 | GO:0070742      |
| 1124 | GO:0017137 | GO:0070615 | GO:0006508      |
| 1125 | GO:0016810 | GO:0070612 | GO:0008514      |
| 1126 | GO:0016407 | GO:0070577 | GO:0045981      |
| 1127 | GO:0016358 | GO:0070491 | GO:0008152      |
| 1128 | GO:0016072 | GO:0070405 | GO:0003824      |
| 1129 | GO:0016056 | GO:0070330 | GO:0000076      |
| 1130 | GO:0009743 | GO:0070181 | GO:0016485      |
| 1131 | GO:0009268 | GO:0070119 | GO:0009887      |
| 1132 | GO:0009163 | GO:0070061 | GO:1901362      |
| 1133 | GO:0008324 | GO:0070035 | GO:2001026      |
| 1134 | GO:0008210 | GO:0006112 | GO:0016482      |
| 1135 | GO:0007612 | GO:0070034 | ENSP00000264563 |
| 1136 | GO:0007259 | GO:0070011 | GO:0018130      |
| 1137 | GO:0007160 | GO:0061733 | GO:0040013      |
| 1138 | GO:0006914 | GO:0061659 | GO:1902774      |
| 1139 | GO:0006869 | GO:0061630 | GO:0042161      |
| 1140 | GO:0006818 | GO:0061135 | GO:1901568      |
| 1141 | GO:0006811 | GO:0061134 | GO:0042277      |
| 1142 | GO:0006699 | GO:0060589 | GO:0006363      |
| 1143 | GO:0006461 | GO:0060090 | GO:0051216      |
| 1144 | GO:0006399 | GO:0060089 | GO:0002700      |
| 1145 | GO:0006284 | GO:0006111 | GO:0006164      |
| 1146 | GO:0006066 | GO:0052909 | GO:0051351      |
| 1147 | GO:0005070 | GO:0052890 | GO:0044665      |
| 1148 | GO:0004930 | GO:0052689 | GO:0031982      |
| 1149 | GO:0004721 | GO:0051996 | GO:0015026      |
| 1150 | GO:0003094 | GO:0051861 | GO:0051252      |
| 1151 | GO:0003002 | GO:0051786 | GO:1901988      |
| 1152 | GO:0002688 | GO:0051540 | GO:0030529      |
| 1153 | GO:0002449 | GO:0051539 | GO:0008016      |
| 1154 | GO:0002252 | GO:0051538 | GO:0030522      |
| 1155 | GO:0002244 | GO:0051537 | GO:0006102      |
| 1156 | GO:0002020 | GO:0006107 | GO:0010468      |
| 1157 | GO:0001909 | GO:0051536 | GO:0008233      |
| 1158 | GO:0001889 | GO:0051431 | GO:0030801      |
| 1159 | GO:0000922 | GO:0051427 | GO:0042440      |
| 1160 | GO:0000808 | GO:0051287 | GO:0007612      |
| 1161 | GO:0000460 | GO:0051219 | GO:0043395      |
| 1162 | GO:0000315 | GO:0051192 | GO:0046907      |

|      |                 |            |                 |
|------|-----------------|------------|-----------------|
| 1163 | GO:0000082      | GO:0051082 | GO:0010556      |
| 1164 | GO:0000070      | GO:0051020 | GO:0003678      |
| 1165 | ENSP00000377944 | GO:0051015 | ENSP00000285949 |
| 1166 | ENSP00000275820 | GO:0050840 | GO:0008237      |
| 1167 | ENSP00000275525 | GO:0006106 | GO:0016327      |
| 1168 | hsa05012        | GO:0050839 | GO:0042787      |
| 1169 | hsa04974        | GO:0050780 | ENSP00000302665 |
| 1170 | hsa04915        | GO:0050681 | GO:0098552      |
| 1171 | hsa03420        | GO:0050662 | GO:0061448      |
| 1172 | hsa03030        | GO:0050661 | GO:1902822      |
| 1173 | hsa03018        | GO:0050660 | GO:0071565      |
| 1174 | hsa00562        | GO:0050178 | GO:0002702      |
| 1175 | hsa00350        | GO:0050136 | GO:0002039      |
| 1176 | hsa00190        | GO:0048551 | GO:0019438      |
| 1177 | GO:2000779      | GO:0048531 | GO:0070169      |
| 1178 | GO:2000021      | GO:0006105 | GO:0043297      |
| 1179 | GO:1904950      | GO:0048365 | GO:0019229      |
| 1180 | GO:1903509      | GO:0048040 | GO:0003697      |
| 1181 | GO:1903019      | GO:0048039 | GO:0070198      |
| 1182 | GO:0099600      | GO:0048038 | GO:0051481      |
| 1183 | GO:0099516      | GO:0048037 | GO:0045428      |
| 1184 | GO:0098900      | GO:0047696 | GO:0006901      |
| 1185 | GO:0098802      | GO:0046983 | GO:0016043      |
| 1186 | GO:0098644      | GO:0046982 | GO:1903506      |
| 1187 | GO:0097305      | GO:0046966 | GO:0046943      |
| 1188 | GO:0097164      | GO:0046961 | GO:0016574      |
| 1189 | GO:0071822      | GO:0006104 | GO:0006355      |
| 1190 | GO:0071104      | GO:0046943 | GO:0007611      |
| 1191 | GO:0070977      | GO:0046933 | GO:0006986      |
| 1192 | GO:0070932      | GO:0046914 | GO:0051271      |
| 1193 | GO:0070830      | GO:0046912 | GO:0009081      |
| 1194 | GO:0070734      | GO:0046906 | GO:1902115      |
| 1195 | GO:0061630      | GO:0046875 | GO:0007264      |
| 1196 | GO:0061517      | GO:0046873 | GO:0051603      |
| 1197 | GO:0061135      | GO:0046872 | GO:0032279      |
| 1198 | GO:0061134      | GO:0046554 | GO:0034440      |
| 1199 | GO:0061097      | GO:0045309 | ENSP00000295897 |
| 1200 | GO:0061024      | GO:0006103 | GO:0048523      |
| 1201 | GO:0060292      | GO:0045155 | GO:0019219      |
| 1202 | GO:0051966      | GO:0044877 | ENSP00000362795 |
| 1203 | GO:0051650      | GO:0044822 | GO:0006344      |
| 1204 | GO:0051287      | GO:0044769 | GO:0015872      |
| 1205 | GO:0051240      | GO:0044620 | GO:0031690      |
| 1206 | GO:0051123      | GO:0044325 | GO:0030315      |
| 1207 | GO:0050886      | GO:0044212 | GO:0002250      |
| 1208 | GO:0050806      | GO:0043997 | GO:0044773      |
| 1209 | GO:0050727      | GO:0043783 | GO:0007030      |
| 1210 | GO:0050680      | GO:0043566 | GO:0071031      |
| 1211 | GO:0048840      | GO:0006102 | GO:0007270      |
| 1212 | GO:0048545      | GO:0043565 | GO:0005684      |
| 1213 | GO:0048387      | GO:0043544 | GO:0018146      |
| 1214 | GO:0048246      | GO:0043531 | GO:0031326      |
| 1215 | GO:0046983      | GO:0043492 | GO:0008037      |

|      |            |            |                 |
|------|------------|------------|-----------------|
| 1216 | GO:0046785 | GO:0043426 | GO:0008284      |
| 1217 | GO:0046710 | GO:0043425 | GO:0051437      |
| 1218 | GO:0046427 | GO:0043395 | GO:2001141      |
| 1219 | GO:0046034 | GO:0043394 | GO:0043236      |
| 1220 | GO:0045815 | GO:0043236 | GO:0007194      |
| 1221 | GO:0044822 | GO:0043185 | GO:0007006      |
| 1222 | GO:0044819 | GO:0006101 | GO:0032642      |
| 1223 | GO:0043618 | GO:0043177 | GO:0046390      |
| 1224 | GO:0043588 | GO:0043169 | GO:1900024      |
| 1225 | GO:0043113 | GO:0043168 | GO:0016070      |
| 1226 | GO:0043044 | GO:0043167 | GO:0001654      |
| 1227 | GO:0043043 | GO:0043021 | ENSP00000275525 |
| 1228 | GO:0042787 | GO:0043015 | GO:0008064      |
| 1229 | GO:0042769 | GO:0042826 | GO:0002443      |
| 1230 | GO:0042274 | GO:0042809 | GO:0019731      |
| 1231 | GO:0042221 | GO:0042803 | GO:0042698      |
| 1232 | GO:0038166 | GO:0042802 | GO:0030810      |
| 1233 | GO:0035725 | GO:0006099 | GO:0030139      |
| 1234 | GO:0035561 | GO:0042800 | GO:0016811      |
| 1235 | GO:0034629 | GO:0042626 | GO:0031571      |
| 1236 | GO:0033860 | GO:0042625 | GO:0030282      |
| 1237 | GO:0033591 | GO:0042623 | GO:0005451      |
| 1238 | GO:0032465 | GO:0042608 | GO:0042508      |
| 1239 | GO:0032225 | GO:0042578 | GO:0007548      |
| 1240 | GO:0032154 | GO:0042393 | GO:0034446      |
| 1241 | GO:0032148 | GO:0042301 | GO:0030968      |
| 1242 | GO:0031994 | GO:0042277 | GO:0030673      |
| 1243 | GO:0031690 | GO:0042162 | GO:1902824      |
| 1244 | GO:0031683 | GO:0006098 | GO:0008289      |
| 1245 | GO:0031638 | GO:0042134 | GO:0044271      |
| 1246 | GO:0031442 | GO:0042056 | GO:0010574      |
| 1247 | GO:0031398 | GO:0042054 | GO:1902582      |
| 1248 | GO:0031122 | GO:0042020 | GO:0043231      |
| 1249 | GO:0030574 | GO:0042019 | GO:0010833      |
| 1250 | GO:0030512 | GO:0042015 | GO:0009889      |
| 1251 | GO:0030496 | GO:0038164 | GO:0050673      |
| 1252 | GO:0030488 | GO:0038024 | GO:0002460      |
| 1253 | GO:0030324 | GO:0038023 | GO:0030332      |
| 1254 | GO:0030279 | GO:0038021 | hsa04750        |
| 1255 | GO:0030246 | GO:0006096 | GO:0032908      |
| 1256 | GO:0030159 | GO:0036442 | ENSP00000295400 |
| 1257 | GO:0022411 | GO:0036440 | GO:0030501      |
| 1258 | GO:0019904 | GO:0036094 | GO:0090533      |
| 1259 | GO:0019829 | GO:0036002 | GO:0016410      |
| 1260 | GO:0019439 | GO:0035639 | GO:0005903      |
| 1261 | GO:0019229 | GO:0035591 | GO:0090575      |
| 1262 | GO:0019080 | GO:0035326 | GO:0023058      |
| 1263 | GO:0018393 | GO:0035258 | GO:0016197      |
| 1264 | GO:0016705 | GO:0035257 | GO:0035637      |
| 1265 | GO:0016627 | GO:0035255 | GO:0019724      |
| 1266 | GO:0016581 | GO:0006091 | GO:0015085      |
| 1267 | GO:0016486 | GO:0035250 | GO:0007435      |
| 1268 | GO:0016236 | GO:0035242 | GO:0005201      |



|      |                 |            |                 |
|------|-----------------|------------|-----------------|
| 1269 | GO:0015934      | GO:0035091 | GO:0046545      |
| 1270 | GO:0015459      | GO:0035064 | GO:0032271      |
| 1271 | GO:0014047      | GO:0035035 | GO:0086003      |
| 1272 | GO:0010835      | GO:0034979 | GO:0050731      |
| 1273 | GO:0010833      | GO:0034714 | GO:0003677      |
| 1274 | GO:0010569      | GO:0034604 | GO:0030816      |
| 1275 | GO:0009108      | GO:0034603 | GO:0005543      |
| 1276 | GO:0009062      | GO:0034602 | GO:0031307      |
| 1277 | GO:0008320      | GO:0006090 | GO:0045988      |
| 1278 | GO:0008301      | GO:0034513 | GO:0031214      |
| 1279 | GO:0008170      | GO:0034511 | GO:0003899      |
| 1280 | GO:0008152      | GO:0034212 | GO:0005884      |
| 1281 | GO:0008047      | GO:0033764 | GO:0045991      |
| 1282 | GO:0007163      | GO:0033613 | GO:0030514      |
| 1283 | GO:0007052      | GO:0033558 | GO:0090087      |
| 1284 | GO:0007009      | GO:0033218 | GO:0048770      |
| 1285 | GO:0006897      | GO:0032947 | ENSP00000265171 |
| 1286 | GO:0006888      | GO:0032561 | GO:0000077      |
| 1287 | GO:0006767      | GO:0032559 | GO:0061726      |
| 1288 | GO:0006749      | GO:0006086 | GO:0008585      |
| 1289 | GO:0006700      | GO:0032555 | GO:0046488      |
| 1290 | GO:0006493      | GO:0032553 | GO:0042886      |
| 1291 | GO:0006403      | GO:0032550 | GO:0044819      |
| 1292 | GO:0006390      | GO:0032549 | GO:0036075      |
| 1293 | GO:0006366      | GO:0032451 | GO:0097367      |
| 1294 | GO:0006363      | GO:0032403 | GO:0043152      |
| 1295 | GO:0006342      | GO:0032041 | GO:0072006      |
| 1296 | GO:0006289      | GO:0031995 | GO:0043547      |
| 1297 | GO:0006106      | GO:0031994 | GO:0030166      |
| 1298 | GO:0005901      | GO:0031896 | GO:0071705      |
| 1299 | GO:0005887      | GO:0006085 | GO:0070061      |
| 1300 | GO:0005819      | GO:0031859 | GO:0042102      |
| 1301 | GO:0005675      | GO:0031826 | GO:0006650      |
| 1302 | GO:0005593      | GO:0031821 | GO:0044298      |
| 1303 | GO:0005516      | GO:0031762 | GO:0004222      |
| 1304 | GO:0005179      | GO:0031748 | GO:2000649      |
| 1305 | GO:0003724      | GO:0031701 | GO:0071436      |
| 1306 | GO:0002757      | GO:0031700 | GO:0030864      |
| 1307 | GO:0002703      | GO:0031692 | GO:0050685      |
| 1308 | GO:0001948      | GO:0031691 | ENSP00000292301 |
| 1309 | GO:0001894      | GO:0031690 | GO:0021545      |
| 1310 | GO:0001893      | GO:0006084 | GO:0006743      |
| 1311 | GO:0001704      | GO:0031683 | ENSP00000263339 |
| 1312 | GO:0001676      | GO:0031625 | GO:0006644      |
| 1313 | GO:0001502      | GO:0031492 | GO:0044282      |
| 1314 | GO:0001106      | GO:0031491 | GO:0035150      |
| 1315 | GO:0000786      | GO:0031490 | GO:0008544      |
| 1316 | GO:0000096      | GO:0031489 | GO:0072431      |
| 1317 | ENSP00000266646 | GO:0031420 | hsa04972        |
| 1318 | ENSP00000249887 | GO:0031406 | GO:0090304      |
| 1319 | hsa04976        | GO:0031386 | GO:0042307      |
| 1320 | hsa04916        | GO:0031267 | GO:0032580      |
| 1321 | hsa04912        | GO:0006082 | GO:0051648      |

|      |            |            |                 |
|------|------------|------------|-----------------|
| 1322 | hsa04713   | GO:0031078 | GO:0052548      |
| 1323 | hsa00514   | GO:0030731 | GO:0071922      |
| 1324 | GO:2001257 | GO:0030697 | GO:0005742      |
| 1325 | GO:1990542 | GO:0030696 | GO:0007260      |
| 1326 | GO:1904666 | GO:0030695 | GO:0060070      |
| 1327 | GO:1903317 | GO:0030594 | GO:0010107      |
| 1328 | GO:1902824 | GO:0030554 | GO:0031099      |
| 1329 | GO:1902578 | GO:0030523 | GO:0034103      |
| 1330 | GO:1901659 | GO:0030515 | GO:0010467      |
| 1331 | GO:1901136 | GO:0030492 | GO:0071840      |
| 1332 | GO:1900004 | GO:0006081 | ENSP00000382166 |
| 1333 | GO:0099503 | GO:0030414 | hsa04962        |
| 1334 | GO:0098794 | GO:0030332 | hsa04630        |
| 1335 | GO:0090503 | GO:0030246 | GO:0030534      |
| 1336 | GO:0090502 | GO:0030234 | GO:0042800      |
| 1337 | GO:0090100 | GO:0030170 | GO:0034645      |
| 1338 | GO:0065005 | GO:0030165 | GO:0009617      |
| 1339 | GO:0060463 | GO:0030159 | GO:0043113      |
| 1340 | GO:0060348 | GO:0030060 | GO:2000816      |
| 1341 | GO:0060170 | GO:0022892 | GO:0008360      |
| 1342 | GO:0055085 | GO:0022891 | GO:0030804      |
| 1343 | GO:0051899 | GO:0006066 | GO:0072395      |
| 1344 | GO:0051716 | GO:0022890 | GO:0075136      |
| 1345 | GO:0051648 | GO:0022857 | GO:0090100      |
| 1346 | GO:0051493 | GO:0022843 | GO:0003743      |
| 1347 | GO:0051340 | GO:0022838 | GO:0061617      |
| 1348 | GO:0051301 | GO:0022836 | GO:0051336      |
| 1349 | GO:0051234 | GO:0022834 | hsa05130        |
| 1350 | GO:0051188 | GO:0022832 | GO:0098609      |
| 1351 | GO:0051186 | GO:0022829 | GO:0098760      |
| 1352 | GO:0051148 | GO:0022804 | hsa04072        |
| 1353 | GO:0051093 | GO:0022803 | GO:0061138      |
| 1354 | GO:0051090 | GO:0006029 | GO:0019003      |
| 1355 | GO:0050900 | GO:0020037 | GO:0022602      |
| 1356 | GO:0050805 | GO:0019981 | GO:0031305      |
| 1357 | GO:0048232 | GO:0019969 | GO:0045940      |
| 1358 | GO:0046912 | GO:0019962 | GO:0009059      |
| 1359 | GO:0046649 | GO:0019961 | GO:0005769      |
| 1360 | GO:0045184 | GO:0019955 | GO:0006302      |
| 1361 | GO:0045123 | GO:0019904 | ENSP00000302150 |
| 1362 | GO:0044452 | GO:0019901 | GO:0043220      |
| 1363 | GO:0044433 | GO:0019900 | GO:0002703      |
| 1364 | GO:0044428 | GO:0019899 | GO:0038043      |
| 1365 | GO:0043624 | GO:0006027 | hsa05166        |
| 1366 | GO:0043547 | GO:0019843 | GO:1903524      |
| 1367 | GO:0043270 | GO:0019840 | GO:0043401      |
| 1368 | GO:0043254 | GO:0019838 | ENSP00000303983 |
| 1369 | GO:0042249 | GO:0019829 | GO:0003676      |
| 1370 | GO:0035270 | GO:0019825 | GO:0046949      |
| 1371 | GO:0035235 | GO:0019789 | GO:0007420      |
| 1372 | GO:0035150 | GO:0019787 | GO:0010506      |
| 1373 | GO:0035067 | GO:0019213 | GO:0001726      |
| 1374 | GO:0034502 | GO:0019205 | hsa04924        |

|      |            |            |                 |
|------|------------|------------|-----------------|
| 1375 | GO:0034470 | GO:0019003 | GO:0016592      |
| 1376 | GO:0034446 | GO:0006026 | GO:0060665      |
| 1377 | GO:0034080 | GO:0019001 | GO:0042730      |
| 1378 | GO:0033683 | GO:0018685 | GO:0086064      |
| 1379 | GO:0033267 | GO:0018024 | GO:0098799      |
| 1380 | GO:0033158 | GO:0017171 | GO:1902106      |
| 1381 | GO:0032436 | GO:0017160 | GO:0060326      |
| 1382 | GO:0032204 | GO:0017137 | ENSP00000348986 |
| 1383 | GO:0032153 | GO:0017136 | GO:0004904      |
| 1384 | GO:0031489 | GO:0017124 | GO:0060170      |
| 1385 | GO:0031428 | GO:0017111 | GO:0006929      |
| 1386 | GO:0031306 | GO:0017076 | GO:0035582      |
| 1387 | GO:0031091 | GO:0006024 | GO:0032467      |
| 1388 | GO:0030728 | GO:0017069 | GO:0051051      |
| 1389 | GO:0030520 | GO:0017056 | GO:0006914      |
| 1390 | GO:0030278 | GO:0017048 | GO:0048646      |
| 1391 | GO:0030201 | GO:0017025 | GO:0003779      |
| 1392 | GO:0030104 | GO:0017022 | GO:0070727      |
| 1393 | GO:0022007 | GO:0017016 | GO:0007588      |
| 1394 | GO:0019900 | GO:0016907 | GO:0019221      |
| 1395 | GO:0019856 | GO:0016903 | ENSP00000266646 |
| 1396 | GO:0019362 | GO:0016896 | GO:0060589      |
| 1397 | GO:0018209 | GO:0016887 | GO:0008238      |
| 1398 | GO:0016592 | GO:0006023 | GO:0048639      |
| 1399 | GO:0016435 | GO:0016885 | GO:0060047      |
| 1400 | GO:0016209 | GO:0016884 | ENSP00000297350 |
| 1401 | GO:0015919 | GO:0016879 | GO:0019852      |
| 1402 | GO:0015630 | GO:0016878 | GO:0019001      |
| 1403 | GO:0015629 | GO:0016875 | GO:0048551      |
| 1404 | GO:0015399 | GO:0016874 | GO:0098781      |
| 1405 | GO:0015266 | GO:0016866 | GO:0030162      |
| 1406 | GO:0010975 | GO:0016863 | GO:0048263      |
| 1407 | GO:0010955 | GO:0016860 | GO:0016055      |
| 1408 | GO:0010765 | GO:0016853 | GO:1900003      |
| 1409 | GO:0009605 | GO:0006022 | GO:1901342      |
| 1410 | GO:0009404 | GO:0016836 | GO:0017048      |
| 1411 | GO:0009303 | GO:0016835 | GO:0006702      |
| 1412 | GO:0008652 | GO:0016832 | GO:0010518      |
| 1413 | GO:0008544 | GO:0016830 | GO:0031941      |
| 1414 | GO:0008201 | GO:0016829 | GO:0048609      |
| 1415 | GO:0008094 | GO:0016820 | GO:0090075      |
| 1416 | GO:0008083 | GO:0016818 | GO:0005905      |
| 1417 | GO:0007603 | GO:0016817 | GO:0002699      |
| 1418 | GO:0007584 | GO:0016811 | hsa04916        |
| 1419 | GO:0007369 | GO:0016810 | GO:0055038      |
| 1420 | GO:0007077 | GO:0006007 | GO:0001936      |
| 1421 | GO:0006986 | GO:0016791 | ENSP00000361084 |
| 1422 | GO:0006974 | GO:0016787 | GO:0005875      |
| 1423 | GO:0006958 | GO:0016779 | GO:0018149      |
| 1424 | GO:0006884 | GO:0016776 | GO:0030203      |
| 1425 | GO:0006865 | GO:0016773 | hsa04062        |
| 1426 | GO:0006790 | GO:0016772 | GO:0048729      |
| 1427 | GO:0006732 | GO:0016765 | GO:1903321      |

|      |                 |            |                 |
|------|-----------------|------------|-----------------|
| 1428 | GO:0006706      | GO:0016758 | GO:0051261      |
| 1429 | GO:0006695      | GO:0016757 | GO:0050663      |
| 1430 | GO:0006520      | GO:0016751 | GO:0030175      |
| 1431 | GO:0006474      | GO:0006006 | GO:0070181      |
| 1432 | GO:0006325      | GO:0016748 | GO:0019829      |
| 1433 | GO:0005996      | GO:0016747 | GO:0001568      |
| 1434 | GO:0005672      | GO:0016746 | GO:0010863      |
| 1435 | GO:0005657      | GO:0016742 | GO:0004905      |
| 1436 | GO:0005578      | GO:0016741 | GO:0001704      |
| 1437 | GO:0005507      | GO:0016740 | GO:0070271      |
| 1438 | GO:0005501      | GO:0016725 | GO:0006704      |
| 1439 | GO:0005172      | GO:0016712 | GO:0038021      |
| 1440 | GO:0004896      | GO:0016709 | hsa04921        |
| 1441 | GO:0004866      | GO:0016705 | GO:0048659      |
| 1442 | GO:0004527      | GO:0005996 | GO:0060255      |
| 1443 | GO:0004108      | GO:0016684 | GO:0042330      |
| 1444 | GO:0002922      | GO:0016681 | GO:0003002      |
| 1445 | GO:0002181      | GO:0016679 | GO:0048524      |
| 1446 | GO:0002090      | GO:0016676 | GO:0043243      |
| 1447 | GO:0001887      | GO:0016675 | GO:1903555      |
| 1448 | GO:0001664      | GO:0016668 | GO:0032549      |
| 1449 | GO:0001091      | GO:0016667 | GO:0009112      |
| 1450 | GO:0000790      | GO:0016655 | GO:0099568      |
| 1451 | GO:0000723      | GO:0016651 | GO:0032946      |
| 1452 | GO:0000209      | GO:0016649 | GO:0090184      |
| 1453 | GO:0000123      | GO:0005975 | GO:0006863      |
| 1454 | ENSP00000348986 | GO:0016645 | GO:0030324      |
| 1455 | hsa05143        | GO:0016635 | GO:0031329      |
| 1456 | hsa05032        | GO:0016634 | GO:2000257      |
| 1457 | hsa04970        | GO:0016628 | GO:0003081      |
| 1458 | hsa04960        | GO:0016627 | GO:1904063      |
| 1459 | hsa04925        | GO:0016624 | GO:0043062      |
| 1460 | hsa04918        | GO:0016620 | GO:0006897      |
| 1461 | hsa04726        | GO:0016616 | GO:0005798      |
| 1462 | hsa04022        | GO:0016614 | hsa04713        |
| 1463 | hsa00900        | GO:0016608 | GO:1904035      |
| 1464 | GO:2001236      | GO:0003417 | GO:0031088      |
| 1465 | GO:2000060      | GO:0016597 | GO:0061462      |
| 1466 | GO:1904029      | GO:0016538 | GO:0045937      |
| 1467 | GO:1903510      | GO:0016509 | GO:0086036      |
| 1468 | GO:1903506      | GO:0016491 | GO:0000151      |
| 1469 | GO:1903052      | GO:0016462 | ENSP00000249887 |
| 1470 | GO:1903051      | GO:0016436 | hsa04744        |
| 1471 | GO:1902936      | GO:0016435 | GO:0006952      |
| 1472 | GO:1902911      | GO:0016433 | GO:0044325      |
| 1473 | GO:1901888      | GO:0016429 | ENSP00000220616 |
| 1474 | GO:1901607      | GO:0016428 | GO:0071173      |
| 1475 | GO:0098772      | GO:0003416 | GO:0001822      |
| 1476 | GO:0098656      | GO:0016426 | GO:0034366      |
| 1477 | GO:0090537      | GO:0016423 | GO:0005507      |
| 1478 | GO:0090304      | GO:0016410 | GO:0050793      |
| 1479 | GO:0090068      | GO:0016408 | GO:0032722      |
| 1480 | GO:0072503      | GO:0016407 | GO:0048384      |

|      |            |            |                 |
|------|------------|------------|-----------------|
| 1481 | GO:0071478 | GO:0016405 | ENSP00000408153 |
| 1482 | GO:0070911 | GO:0016301 | GO:0030502      |
| 1483 | GO:0070897 | GO:0016300 | GO:0036498      |
| 1484 | GO:0070742 | GO:0016298 | GO:0042509      |
| 1485 | GO:0070129 | GO:0016279 | GO:0030538      |
| 1486 | GO:0061337 | GO:0003095 | GO:2000058      |
| 1487 | GO:0060323 | GO:0016278 | GO:0010631      |
| 1488 | GO:0060312 | GO:0016274 | GO:0046037      |
| 1489 | GO:0060309 | GO:0016273 | GO:0007626      |
| 1490 | GO:0060073 | GO:0016247 | GO:0050709      |
| 1491 | GO:0055078 | GO:0016229 | GO:0042517      |
| 1492 | GO:0055038 | GO:0016209 | GO:0007166      |
| 1493 | GO:0051651 | GO:0016150 | GO:0033148      |
| 1494 | GO:0051304 | GO:0015631 | GO:0033688      |
| 1495 | GO:0051297 | GO:0015491 | GO:1903307      |
| 1496 | GO:0051131 | GO:0015464 | GO:0046425      |
| 1497 | GO:0051094 | GO:0003094 | GO:0080090      |
| 1498 | GO:0051047 | GO:0015459 | GO:0071025      |
| 1499 | GO:0051031 | GO:0015405 | GO:0060322      |
| 1500 | GO:0051020 | GO:0015399 | GO:0090501      |
| 1501 | GO:0050911 | GO:0015370 | GO:0007259      |
| 1502 | GO:0050848 | GO:0015298 | GO:0031323      |
| 1503 | GO:0050792 | GO:0015297 | GO:0030728      |
| 1504 | GO:0050709 | GO:0015296 | hsa04670        |
| 1505 | GO:0050434 | GO:0015294 | GO:0000930      |
| 1506 | GO:0048640 | GO:0015293 | GO:0051459      |
| 1507 | GO:0048598 | GO:0015291 | GO:0005515      |
| 1508 | GO:0046599 | hsa00982   | GO:0044769      |
| 1509 | GO:0046578 | GO:0003081 | GO:0050671      |
| 1510 | GO:0045862 | GO:0015288 | GO:0016601      |
| 1511 | GO:0045744 | GO:0015276 | GO:0005096      |
| 1512 | GO:0045263 | GO:0015267 | GO:0071392      |
| 1513 | GO:0044298 | GO:0015266 | ENSP00000332659 |
| 1514 | GO:0044272 | GO:0015108 | GO:0097696      |
| 1515 | GO:0044237 | GO:0015103 | GO:0032496      |
| 1516 | GO:0043901 | GO:0015085 | GO:0032561      |
| 1517 | GO:0043394 | GO:0015081 | hsa04961        |
| 1518 | GO:0043268 | GO:0015079 | GO:0001655      |
| 1519 | GO:0043241 | GO:0015078 | GO:0098644      |
| 1520 | GO:0043233 | GO:0003073 | GO:0016584      |
| 1521 | GO:0043227 | GO:0015077 | GO:0070925      |
| 1522 | GO:0043114 | GO:0015075 | hsa04728        |
| 1523 | GO:0042407 | GO:0015036 | GO:0001503      |
| 1524 | GO:0038024 | GO:0015026 | GO:0002028      |
| 1525 | GO:0034983 | GO:0015002 | GO:0002786      |
| 1526 | GO:0034103 | GO:0010576 | GO:0072401      |
| 1527 | GO:0033260 | GO:0010485 | GO:0030097      |
| 1528 | GO:0033148 | GO:0010484 | GO:0005509      |
| 1529 | GO:0033143 | GO:0009982 | GO:1903729      |
| 1530 | GO:0033048 | GO:0009055 | GO:2000027      |
| 1531 | GO:0032501 | GO:0003071 | GO:0008144      |
| 1532 | GO:0032403 | GO:0009019 | GO:0048660      |
| 1533 | GO:0032273 | GO:0008988 | GO:0071345      |

|      |            |            |                 |
|------|------------|------------|-----------------|
| 1534 | GO:0031692 | GO:0008757 | GO:0006139      |
| 1535 | GO:0031584 | GO:0008650 | GO:0006928      |
| 1536 | GO:0031497 | GO:0008649 | GO:0071702      |
| 1537 | GO:0031397 | GO:0008603 | GO:0002807      |
| 1538 | GO:0030866 | GO:0008556 | GO:0032602      |
| 1539 | GO:0030687 | GO:0008545 | GO:0016056      |
| 1540 | GO:0030670 | GO:0008536 | GO:0050804      |
| 1541 | GO:0030213 | GO:0008528 | GO:0045669      |
| 1542 | GO:0030198 | GO:0003069 | GO:0002181      |
| 1543 | GO:0023051 | GO:0008514 | GO:2000045      |
| 1544 | GO:0022625 | GO:0008509 | GO:0033135      |
| 1545 | GO:0022603 | GO:0008495 | GO:0005254      |
| 1546 | GO:0019318 | GO:0008401 | GO:0001501      |
| 1547 | GO:0019205 | GO:0008395 | GO:0003015      |
| 1548 | GO:0017053 | GO:0008378 | GO:0004722      |
| 1549 | GO:0017048 | GO:0008375 | GO:0002252      |
| 1550 | GO:0016820 | GO:0008353 | GO:2000144      |
| 1551 | GO:0016772 | GO:0008324 | GO:0061008      |
| 1552 | GO:0016765 | GO:0008320 | GO:1904892      |
| 1553 | GO:0016740 | GO:0003044 | ENSP00000165524 |
| 1554 | GO:0016052 | GO:0008301 | GO:0032680      |
| 1555 | GO:0015696 | GO:0008289 | GO:0044304      |
| 1556 | GO:0015672 | GO:0008276 | GO:0005070      |
| 1557 | GO:0015297 | GO:0008270 | GO:0070371      |
| 1558 | GO:0014012 | GO:0008238 | GO:0030030      |
| 1559 | GO:0010544 | GO:0008237 | GO:0033002      |
| 1560 | GO:0010484 | GO:0008236 | GO:0016773      |
| 1561 | GO:0010243 | GO:0008233 | ENSP00000332504 |
| 1562 | GO:0010033 | GO:0008227 | ENSP00000009180 |
| 1563 | GO:0009893 | GO:0008201 | ENSP00000259239 |
| 1564 | GO:0009583 | GO:0003018 | ENSP00000350256 |
| 1565 | GO:0009187 | GO:0008194 | hsa04510        |
| 1566 | GO:0008649 | GO:0008191 | GO:1902402      |
| 1567 | GO:0007632 | GO:0008187 | GO:0045184      |
| 1568 | GO:0007566 | GO:0008186 | GO:0002440      |
| 1569 | GO:0007204 | GO:0008177 | GO:0044430      |
| 1570 | GO:0007179 | GO:0008176 | GO:0003012      |
| 1571 | GO:0007164 | GO:0008175 | GO:0005593      |
| 1572 | GO:0007088 | GO:0008173 | GO:0090130      |
| 1573 | GO:0007015 | GO:0008171 | GO:0030866      |
| 1574 | GO:0006977 | GO:0008170 | GO:0071936      |
| 1575 | GO:0006955 | GO:0003015 | GO:0030029      |
| 1576 | GO:0006954 | GO:0008168 | GO:0010720      |
| 1577 | GO:0006904 | GO:0008144 | ENSP00000386884 |
| 1578 | GO:0006886 | GO:0008137 | GO:1904062      |
| 1579 | GO:0006705 | GO:0008135 | GO:0010575      |
| 1580 | GO:0006702 | GO:0008134 | GO:0002815      |
| 1581 | GO:0006694 | GO:0008121 | hsa05110        |
| 1582 | GO:0006637 | GO:0008094 | GO:0046651      |
| 1583 | GO:0006470 | GO:0008092 | GO:0006977      |
| 1584 | GO:0006446 | GO:0008083 | GO:0016772      |
| 1585 | GO:0006401 | GO:0008080 | hsa04973        |
| 1586 | GO:0006297 | GO:0003014 | GO:0030155      |

|      |                 |            |                  |
|------|-----------------|------------|------------------|
| 1587 | GO:0006260      | GO:0008066 | GO:2000258       |
| 1588 | GO:0006112      | GO:0008047 | hsa04925         |
| 1589 | GO:0005925      | GO:0008026 | GO:0031577       |
| 1590 | GO:0005876      | GO:0008017 | GO:0034766       |
| 1591 | GO:0005802      | GO:0008009 | hsa04151         |
| 1592 | GO:0005769      | GO:0005549 | GO:0035255       |
| 1593 | GO:0005741      | GO:0005546 | GO:0046483       |
| 1594 | GO:0005577      | GO:0005543 | GO:0051258       |
| 1595 | GO:0005518      | GO:0005539 | GO:0006725       |
| 1596 | GO:0005506      | GO:0005527 | GO:0044853       |
| 1597 | GO:0005246      | GO:0003013 | GO:0033043       |
| 1598 | GO:0005216      | GO:0005525 | ENSP00000297439  |
| 1599 | GO:0002526      | GO:0005524 | GO:0051604       |
| 1600 | GO:0002063      | GO:0005520 | GO:0005669       |
| 1601 | GO:0002029      | GO:0005518 | GO:0048858       |
| 1602 | GO:0001974      | GO:0005516 | GO:1902578       |
| 1603 | GO:0001935      | GO:0005515 | GO:0042734       |
| 1604 | GO:0001775      | GO:0005509 | GO:0051240       |
| 1605 | GO:0001179      | GO:0005507 | GO:0033177       |
| 1606 | GO:0000932      | GO:0005506 | GO:0061044       |
| 1607 | GO:0000806      | GO:0005501 | GO:0019882       |
| 1608 | GO:0000788      | GO:0003012 | GO:0008542       |
| 1609 | ENSP00000306245 | GO:0005488 | GO:0043087       |
| 1610 | ENSP00000165524 | GO:0005451 | GO:0010193       |
| 1611 | hsa05204        | GO:0005391 | GO:0005253       |
| 1612 | hsa04720        | GO:0005342 | GO:0031347       |
| 1613 | hsa04310        | GO:0005267 | GO:0002433       |
| 1614 | hsa04261        | GO:0005262 | GO:0051239       |
| 1615 | hsa04114        | GO:0005261 | GO:0032990       |
| 1616 | GO:2001020      | GO:0005254 | GO:0001158       |
| 1617 | GO:2000617      | GO:0005253 | GO:0042470       |
| 1618 | GO:1990204      | GO:0005246 | GO:0034113       |
| 1619 | GO:1903055      | GO:0003008 | GO:0036211       |
| 1620 | GO:1902947      | GO:0005244 | GO:0046209       |
| 1621 | GO:1902822      | GO:0005216 | GO:1901363       |
| 1622 | GO:1902622      | GO:0005215 | GO:0031213       |
| 1623 | GO:1902589      | GO:0005201 | GO:1903279       |
| 1624 | GO:1901990      | GO:0005198 | GO:0001889       |
| 1625 | GO:1901989      | GO:0005184 | GO:0006383       |
| 1626 | GO:1901617      | GO:0005179 | GO:0010765       |
| 1627 | GO:1901566      | GO:0005178 | ENSP000000312652 |
| 1628 | GO:1901379      | GO:0005172 | GO:0006780       |
| 1629 | GO:1900086      | GO:0005138 | GO:0032479       |
| 1630 | GO:0097190      | GO:0003006 | GO:0048640       |
| 1631 | GO:0097110      | GO:0005126 | GO:0051571       |
| 1632 | GO:0090670      | GO:0005125 | GO:0031398       |
| 1633 | GO:0090303      | GO:0005109 | GO:0032689       |
| 1634 | GO:0090166      | GO:0005104 | GO:0052547       |
| 1635 | GO:0090075      | GO:0005102 | GO:0031442       |
| 1636 | GO:0086065      | GO:0005096 | GO:0090288       |
| 1637 | GO:0080135      | GO:0005070 | GO:0016048       |
| 1638 | GO:0072655      | GO:0004993 | GO:0031968       |
| 1639 | GO:0072521      | GO:0004984 | GO:0001540       |

|      |            |            |                 |
|------|------------|------------|-----------------|
| 1640 | GO:0072006 | GO:0004930 | GO:0098602      |
| 1641 | GO:0071635 | GO:0003002 | GO:0000184      |
| 1642 | GO:0071556 | GO:0004924 | GO:0034080      |
| 1643 | GO:0071354 | GO:0004923 | GO:0070167      |
| 1644 | GO:0070405 | GO:0004917 | GO:2000404      |
| 1645 | GO:0070227 | GO:0004915 | GO:0006957      |
| 1646 | GO:0061196 | GO:0004914 | GO:0032994      |
| 1647 | GO:0060548 | GO:0004913 | GO:0071559      |
| 1648 | GO:0060416 | GO:0004912 | GO:0097159      |
| 1649 | GO:0060349 | GO:0004906 | GO:0007599      |
| 1650 | GO:0060255 | GO:0004905 | GO:0048545      |
| 1651 | GO:0060027 | GO:0004904 | GO:0016301      |
| 1652 | GO:0055114 | GO:0002943 | ENSP00000262030 |
| 1653 | GO:0051969 | GO:0004900 | GO:0050820      |
| 1654 | GO:0051726 | GO:0004897 | GO:0097502      |
| 1655 | GO:0051656 | GO:0004896 | GO:0042019      |
| 1656 | GO:0051603 | GO:0004888 | GO:0016337      |
| 1657 | GO:0051572 | GO:0004872 | GO:0033631      |
| 1658 | GO:0051384 | GO:0004871 | GO:0048365      |
| 1659 | GO:0050917 | GO:0004867 | ENSP00000334364 |
| 1660 | GO:0050829 | GO:0004866 | ENSP00000306245 |
| 1661 | GO:0048861 | GO:0004857 | GO:0004672      |
| 1662 | GO:0048522 | GO:0004842 | GO:0022407      |
| 1663 | GO:0048513 | GO:0002940 | GO:0097481      |
| 1664 | GO:0048259 | GO:0004812 | GO:0007097      |
| 1665 | GO:0046982 | GO:0004809 | GO:0030150      |
| 1666 | GO:0046961 | GO:0004776 | GO:0051056      |
| 1667 | GO:0046943 | GO:0004775 | GO:0042089      |
| 1668 | GO:0046425 | GO:0004774 | GO:0018209      |
| 1669 | GO:0045739 | GO:0004769 | GO:0030665      |
| 1670 | GO:0045333 | GO:0004739 | GO:0019222      |
| 1671 | GO:0044304 | GO:0004738 | GO:0002689      |
| 1672 | GO:0044249 | GO:0004722 | GO:0002029      |
| 1673 | GO:0044242 | GO:0004721 | GO:0005874      |
| 1674 | GO:0044087 | GO:0002923 | GO:0001667      |
| 1675 | GO:0044070 | GO:0004703 | GO:0031333      |
| 1676 | GO:0043567 | GO:0004693 | GO:0006409      |
| 1677 | GO:0043492 | GO:0004674 | GO:0005834      |
| 1678 | GO:0043434 | GO:0004672 | GO:0050878      |
| 1679 | GO:0043103 | GO:0004620 | GO:0038166      |
| 1680 | GO:0042826 | GO:0004602 | GO:0044291      |
| 1681 | GO:0042803 | GO:0004601 | GO:0048661      |
| 1682 | GO:0042738 | GO:0004591 | GO:0061418      |
| 1683 | GO:0042446 | GO:0004582 | GO:0090287      |
| 1684 | GO:0035591 | GO:0004540 | GO:0006026      |
| 1685 | GO:0035249 | GO:0002922 | GO:0008104      |
| 1686 | GO:0035019 | GO:0004532 | GO:1901360      |
| 1687 | GO:0034366 | GO:0004527 | GO:0019068      |
| 1688 | GO:0034358 | GO:0004518 | GO:0070142      |
| 1689 | GO:0034114 | GO:0004497 | GO:0045445      |
| 1690 | GO:0033145 | GO:0004468 | GO:2000060      |
| 1691 | GO:0033046 | GO:0004448 | GO:0032606      |
| 1692 | GO:0033045 | GO:0004407 | ENSP00000365663 |



|      |            |            |            |
|------|------------|------------|------------|
| 1693 | GO:0032970 | GO:0004402 | GO:0042578 |
| 1694 | GO:0032956 | GO:0004386 | GO:0006700 |
| 1695 | GO:0032926 | GO:0004385 | GO:0018216 |
| 1696 | GO:0032806 | GO:0002920 | GO:0031683 |
| 1697 | GO:0032784 | GO:0004362 | GO:0001935 |
| 1698 | GO:0032543 | GO:0004333 | GO:0030838 |
| 1699 | GO:0032504 | GO:0004311 | GO:0005876 |
| 1700 | GO:0032479 | GO:0004310 | hsa04270   |
| 1701 | GO:0032392 | GO:0004303 | GO:0002360 |
| 1702 | GO:0031526 | GO:0004300 | hsa05215   |
| 1703 | GO:0031226 | GO:0004252 | GO:2000142 |
| 1704 | GO:0031099 | GO:0004222 | GO:0046933 |
| 1705 | GO:0030838 | GO:0004175 | GO:0048584 |
| 1706 | GO:0030833 | GO:0004174 | GO:1900004 |
| 1707 | GO:0030689 | GO:0002862 | GO:0045667 |
| 1708 | GO:0030424 | GO:0004169 | GO:0043923 |
| 1709 | GO:0030203 | GO:0004152 | GO:0051248 |
| 1710 | GO:0030100 | GO:0004149 | GO:0010714 |
| 1711 | GO:0023061 | GO:0004148 | GO:0030301 |
| 1712 | GO:0022900 | GO:0004129 | hsa04912   |
| 1713 | GO:0022898 | GO:0004108 | GO:0048514 |
| 1714 | GO:0022892 | GO:0004096 | GO:0002009 |
| 1715 | GO:0022836 | GO:0004045 | GO:0015918 |
| 1716 | GO:0022617 | GO:0004004 | GO:0030168 |
| 1717 | GO:0019953 | GO:0004003 | GO:0022007 |
| 1718 | GO:0019898 | GO:0002833 | GO:0050870 |
| 1719 | GO:0019827 | GO:0003994 | GO:0045862 |
| 1720 | GO:0019825 | GO:0003988 | hsa04810   |
| 1721 | GO:0019725 | GO:0003963 | GO:0005172 |
| 1722 | GO:0019001 | GO:0003954 | GO:0090175 |
| 1723 | GO:0018193 | GO:0003938 | GO:0031513 |
| 1724 | GO:0016942 | GO:0003924 | GO:0090257 |
| 1725 | GO:0016866 | GO:0003899 | GO:0006606 |
| 1726 | GO:0016712 | GO:0003878 | GO:0000242 |
| 1727 | GO:0016709 | GO:0003857 | GO:0001894 |
| 1728 | GO:0016578 | GO:0003854 | GO:0006470 |
| 1729 | GO:0016567 | GO:0002831 | GO:0044297 |
| 1730 | GO:0016477 | GO:0003824 | GO:0045744 |
| 1731 | GO:0016423 | GO:0003779 | GO:0031175 |
| 1732 | GO:0016259 | GO:0003746 | GO:0017160 |
| 1733 | GO:0015980 | GO:0003743 | GO:0005790 |
| 1734 | GO:0015711 | GO:0003735 | hsa04360   |
| 1735 | GO:0015298 | GO:0003729 | GO:0030165 |
| 1736 | GO:0015291 | GO:0003727 | GO:0043271 |
| 1737 | GO:0015075 | GO:0003724 | GO:0072358 |
| 1738 | GO:0015036 | GO:0003723 | GO:0002020 |
| 1739 | GO:0010812 | GO:0003714 | GO:0051345 |
| 1740 | GO:0010715 | GO:0002816 | GO:0044249 |
| 1741 | GO:0010596 | GO:0003713 | GO:0034097 |
| 1742 | GO:0010498 | GO:0003712 | GO:0006098 |
| 1743 | GO:0007626 | GO:0003705 | GO:0007584 |
| 1744 | GO:0007492 | GO:0003700 | GO:0030212 |
| 1745 | GO:0007270 | GO:0003697 | GO:0050890 |

|      |                 |            |            |
|------|-----------------|------------|------------|
| 1746 | GO:0007188      | GO:0003690 | GO:0048812 |
| 1747 | GO:0007162      | GO:0003684 | GO:0045619 |
| 1748 | GO:0007154      | GO:0003682 | GO:0006396 |
| 1749 | GO:0007095      | GO:0003678 | GO:0006461 |
| 1750 | GO:0007051      | GO:0003677 | GO:0001934 |
| 1751 | GO:0007010      | GO:0002815 | GO:0098858 |
| 1752 | GO:0006814      | GO:0003676 | GO:0031960 |
| 1753 | GO:0006807      | GO:0003674 | GO:0031267 |
| 1754 | GO:0006805      | GO:0002046 | hsa03010   |
| 1755 | GO:0006635      | GO:0002039 | GO:0005581 |
| 1756 | GO:0006479      | GO:0002020 | GO:0010755 |
| 1757 | GO:0006418      | GO:0001972 | GO:1902988 |
| 1758 | GO:0006415      | GO:0001968 | GO:0045580 |
| 1759 | GO:0006405      | GO:0001948 | GO:0090261 |
| 1760 | GO:0006370      | GO:0001883 | GO:0080135 |
| 1761 | GO:0006368      | GO:0001882 | GO:0000812 |
| 1762 | GO:0006026      | GO:0002807 | GO:0051494 |
| 1763 | GO:0005721      | GO:0001784 | GO:0048585 |
| 1764 | GO:0005451      | GO:0001664 | GO:0048534 |
| 1765 | GO:0005342      | GO:0001653 | GO:1901576 |
| 1766 | GO:0003746      | GO:0001618 | GO:0005634 |
| 1767 | GO:0003712      | GO:0001567 | GO:0071900 |
| 1768 | GO:0003095      | GO:0001540 | GO:1903305 |
| 1769 | GO:0002377      | GO:0001532 | GO:0032986 |
| 1770 | GO:0002031      | GO:0001228 | GO:0032922 |
| 1771 | GO:0001991      | GO:0001227 | GO:0097485 |
| 1772 | GO:0001833      | GO:0001205 | GO:0010632 |
| 1773 | GO:0001228      | GO:0002805 | GO:0009058 |
| 1774 | GO:0000977      | GO:0001191 | GO:0043900 |
| 1775 | GO:0000940      | GO:0001190 | GO:0031399 |
| 1776 | GO:0000904      | GO:0001179 | GO:0048598 |
| 1777 | GO:0000724      | GO:0001159 | GO:0030204 |
| 1778 | GO:0000462      | GO:0001158 | GO:2000785 |
| 1779 | ENSP00000278407 | GO:0001106 | GO:0007596 |
| 1780 | ENSP00000223073 | GO:0001105 | GO:1901032 |
| 1781 | hsa05414        | GO:0001104 | GO:0005912 |
| 1782 | hsa05169        | GO:0001103 | GO:0009967 |
| 1783 | hsa05132        | GO:0001102 | GO:0018193 |
| 1784 | hsa04660        | GO:0002803 | GO:0006884 |
| 1785 | hsa03040        | GO:0001099 | GO:0007167 |
| 1786 | hsa00330        | GO:0001098 | GO:0043086 |
| 1787 | hsa00072        | GO:0001091 | GO:0061140 |
| 1788 | GO:2000045      | GO:0001085 | GO:0071391 |
| 1789 | GO:1990351      | GO:0001078 | GO:0030670 |
| 1790 | GO:1904951      | GO:0001077 | GO:0043194 |
| 1791 | GO:1903524      | GO:0001076 | GO:1904951 |
| 1792 | GO:1903364      | GO:0001071 | GO:0044409 |
| 1793 | GO:1902953      | GO:0001067 | GO:0008603 |
| 1794 | GO:1902042      | GO:0001054 | GO:0050817 |
| 1795 | GO:1901799      | GO:0002791 | GO:0034332 |
| 1796 | GO:1901796      | GO:0001047 | GO:0030055 |
| 1797 | GO:1901571      | GO:0001046 | GO:0050812 |
| 1798 | GO:0098801      | GO:0001025 | GO:0048861 |

|      |            |            |                 |
|------|------------|------------|-----------------|
| 1799 | GO:0098799 | GO:0001012 | GO:0010975      |
| 1800 | GO:0098793 | GO:0000989 | GO:0071459      |
| 1801 | GO:0098576 | GO:0000988 | GO:0036126      |
| 1802 | GO:0097435 | GO:0000987 | GO:0007399      |
| 1803 | GO:0097431 | GO:0000982 | ENSP00000314441 |
| 1804 | GO:0097159 | GO:0000981 | GO:0006112      |
| 1805 | GO:0090080 | GO:0000980 | GO:0061337      |
| 1806 | GO:0086036 | GO:0002790 | GO:0005925      |
| 1807 | GO:0072522 | GO:0000979 | GO:0016538      |
| 1808 | GO:0071806 | GO:0000978 | GO:0033591      |
| 1809 | GO:0071704 | GO:0000977 | GO:1901299      |
| 1810 | GO:0071459 | GO:0000976 | GO:0050867      |
| 1811 | GO:0071392 | GO:0000975 | GO:0050810      |
| 1812 | GO:0070838 | GO:0000287 | GO:0019897      |
| 1813 | GO:0070588 | GO:0000268 | GO:0043234      |
| 1814 | GO:0070160 | GO:0000179 | GO:0051668      |
| 1815 | GO:0070071 | GO:0000175 | GO:0032637      |
| 1816 | GO:0070069 | GO:0000166 | GO:0022604      |
| 1817 | GO:0065008 | GO:0002786 | GO:0001909      |
| 1818 | GO:0061640 | GO:0000104 | GO:2000105      |
| 1819 | GO:0061197 | GO:0000062 | GO:0045662      |
| 1820 | GO:0061041 | GO:0000049 | GO:0042327      |
| 1821 | GO:0060986 | GO:0000036 | GO:0014068      |
| 1822 | GO:0060968 | GO:0000030 | GO:0034641      |
| 1823 | GO:0052548 | GO:1990904 | GO:0002251      |
| 1824 | GO:0051954 | GO:1990777 | GO:1903557      |
| 1825 | GO:0051883 | GO:1990391 | GO:0006029      |
| 1826 | GO:0051782 | GO:1990351 | GO:0043931      |
| 1827 | GO:0051302 | GO:1990234 | GO:0006703      |
| 1828 | GO:0051248 | GO:0002784 | GO:0070897      |
| 1829 | GO:0051247 | GO:1990204 | GO:0030073      |
| 1830 | GO:0051225 | GO:1904949 | GO:0048167      |
| 1831 | GO:0051171 | GO:1903561 | GO:0060712      |
| 1832 | GO:0051168 | GO:1902911 | GO:0042107      |
| 1833 | GO:0051101 | GO:1902562 | GO:0043227      |
| 1834 | GO:0051082 | GO:1902554 | GO:0000060      |
| 1835 | GO:0051028 | GO:1902495 | GO:0031100      |
| 1836 | GO:0050803 | GO:1902494 | GO:0046872      |
| 1837 | GO:0050793 | GO:1902493 | GO:0099572      |
| 1838 | GO:0050685 | GO:0099572 | GO:0048011      |
| 1839 | GO:0048365 | GO:0002780 | GO:0044272      |
| 1840 | GO:0046933 | GO:0099568 | GO:0036094      |
| 1841 | GO:0046851 | GO:0099513 | hsa04024        |
| 1842 | GO:0046717 | GO:0099512 | GO:0031234      |
| 1843 | GO:0046689 | GO:0099503 | GO:0042110      |
| 1844 | GO:0045991 | GO:0098862 | GO:0017158      |
| 1845 | GO:0045988 | GO:0098858 | GO:0060401      |
| 1846 | GO:0045667 | GO:0098857 | GO:0002064      |
| 1847 | GO:0044877 | GO:0098852 | GO:0035384      |
| 1848 | GO:0044839 | GO:0098805 | hsa04915        |
| 1849 | GO:0044815 | GO:0098803 | GO:0051651      |
| 1850 | GO:0044723 | GO:0002779 | GO:0048667      |
| 1851 | GO:0044456 | GO:0098802 | GO:0050962      |

|      |            |            |                 |
|------|------------|------------|-----------------|
| 1852 | GO:0044427 | GO:0098800 | GO:0001071      |
| 1853 | GO:0044291 | GO:0098799 | GO:0051649      |
| 1854 | GO:0043486 | GO:0098798 | GO:0003700      |
| 1855 | GO:0043406 | GO:0098797 | GO:0046085      |
| 1856 | GO:0043401 | GO:0098796 | GO:0007159      |
| 1857 | GO:0043207 | GO:0098794 | GO:0043492      |
| 1858 | GO:0043185 | GO:0098793 | GO:0098576      |
| 1859 | GO:0043170 | GO:0098791 | GO:0032989      |
| 1860 | GO:0042448 | GO:0098687 | GO:0043267      |
| 1861 | GO:0042383 | GO:0002778 | GO:0042130      |
| 1862 | GO:0042339 | GO:0098644 | GO:1901991      |
| 1863 | GO:0042176 | GO:0098590 | GO:0006807      |
| 1864 | GO:0042168 | GO:0098589 | GO:1902946      |
| 1865 | GO:0042134 | GO:0098588 | GO:0022008      |
| 1866 | GO:0042056 | GO:0098576 | GO:0033619      |
| 1867 | GO:0035966 | GO:0098573 | GO:0009982      |
| 1868 | GO:0035588 | GO:0098562 | GO:0019082      |
| 1869 | GO:0035411 | GO:0098552 | GO:0050715      |
| 1870 | GO:0034663 | GO:0098536 | GO:0050686      |
| 1871 | GO:0034602 | GO:0098533 | GO:0070489      |
| 1872 | GO:0033613 | GO:0002777 | GO:0050777      |
| 1873 | GO:0033262 | GO:0097610 | GO:0048666      |
| 1874 | GO:0032989 | GO:0097481 | GO:1901407      |
| 1875 | GO:0032925 | GO:0097458 | GO:1903309      |
| 1876 | GO:0032880 | GO:0097431 | GO:0007265      |
| 1877 | GO:0032787 | GO:0097425 | GO:0071310      |
| 1878 | GO:0032620 | GO:0097381 | GO:0051057      |
| 1879 | GO:0032435 | GO:0097346 | hsa04071        |
| 1880 | GO:0032412 | GO:0097208 | GO:1904949      |
| 1881 | GO:0032402 | GO:0097060 | GO:0003746      |
| 1882 | GO:0032370 | GO:0097025 | GO:0050865      |
| 1883 | GO:0032205 | GO:0002775 | GO:0043168      |
| 1884 | GO:0032200 | GO:0090661 | GO:0033158      |
| 1885 | GO:0032040 | GO:0090575 | GO:0006086      |
| 1886 | GO:0031349 | GO:0090568 | GO:0030135      |
| 1887 | GO:0031329 | GO:0090545 | GO:0051861      |
| 1888 | GO:0031145 | GO:0090544 | GO:0009101      |
| 1889 | GO:0031060 | GO:0090537 | GO:0051091      |
| 1890 | GO:0030953 | GO:0090533 | GO:0043103      |
| 1891 | GO:0030816 | GO:0072686 | GO:1904018      |
| 1892 | GO:0030802 | GO:0072589 | GO:0022804      |
| 1893 | GO:0030502 | GO:0072588 | GO:0008092      |
| 1894 | GO:0030282 | GO:0002768 | GO:0032269      |
| 1895 | GO:0030150 | GO:0072562 | GO:0008361      |
| 1896 | GO:0030010 | GO:0072536 | GO:0006450      |
| 1897 | GO:0022616 | GO:0072372 | GO:0046710      |
| 1898 | GO:0022600 | GO:0071944 | GO:0007568      |
| 1899 | GO:0019897 | GO:0071682 | GO:0032802      |
| 1900 | GO:0019867 | GO:0071565 | ENSP00000295453 |
| 1901 | GO:0019843 | GO:0071564 | GO:0051384      |
| 1902 | GO:0019226 | GO:0071556 | GO:0048259      |
| 1903 | GO:0019058 | GO:0071339 | GO:0002092      |
| 1904 | GO:0016878 | GO:0071062 | GO:0010965      |

|      |            |            |            |
|------|------------|------------|------------|
| 1905 | GO:0016776 | GO:0002764 | GO:0007266 |
| 1906 | GO:0016748 | GO:0071013 | GO:0048583 |
| 1907 | GO:0016635 | GO:0070993 | GO:0005576 |
| 1908 | GO:0016574 | GO:0070822 | GO:0030320 |
| 1909 | GO:0016482 | GO:0070761 | GO:0050854 |
| 1910 | GO:0016410 | GO:0070603 | GO:0002429 |
| 1911 | GO:0016301 | GO:0070545 | GO:0031572 |
| 1912 | GO:0016278 | GO:0070469 | GO:0030182 |
| 1913 | GO:0016054 | GO:0070461 | GO:0032755 |
| 1914 | GO:0016043 | GO:0070382 | GO:0043197 |
| 1915 | GO:0016042 | GO:0070195 | GO:0012506 |
| 1916 | GO:0015918 | GO:0002760 | GO:0004310 |
| 1917 | GO:0014070 | GO:0070161 | GO:0045453 |
| 1918 | GO:0010193 | GO:0070160 | GO:0044438 |
| 1919 | GO:0009628 | GO:0070110 | GO:0060670 |
| 1920 | GO:0009620 | GO:0070069 | GO:0051431 |
| 1921 | GO:0009451 | GO:0070062 | GO:0005819 |
| 1922 | GO:0009306 | GO:0070013 | GO:1904036 |
| 1923 | GO:0009083 | GO:0065010 | GO:0006955 |
| 1924 | GO:0008406 | GO:0061695 | GO:0061034 |
| 1925 | GO:0008360 | GO:0061617 | GO:0048468 |
| 1926 | GO:0008334 | GO:0060205 | GO:0032943 |
| 1927 | GO:0008211 | GO:0002759 | GO:0045595 |
| 1928 | GO:0008175 | GO:0060170 | GO:0001618 |
| 1929 | GO:0008033 | GO:0060076 | GO:0050927 |
| 1930 | GO:0008016 | GO:0055038 | GO:0000323 |
| 1931 | GO:0007283 | GO:0055037 | GO:0051031 |
| 1932 | GO:0007200 | GO:0055029 | GO:0014909 |
| 1933 | GO:0006939 | GO:0051233 | GO:0045664 |
| 1934 | GO:0006935 | GO:0048770 | GO:0001784 |
| 1935 | GO:0006933 | GO:0048471 | GO:0032420 |
| 1936 | GO:0006511 | GO:0048188 | GO:0030163 |
| 1937 | GO:0006281 | GO:0046658 | GO:1903561 |
| 1938 | GO:0006023 | GO:0002757 | GO:0019899 |
| 1939 | GO:0005947 | GO:0045335 | GO:0016835 |
| 1940 | GO:0005938 | GO:0045334 | GO:0042044 |
| 1941 | GO:0005525 | GO:0045283 | GO:0016310 |
| 1942 | GO:0005515 | GO:0045281 | GO:0050951 |
| 1943 | GO:0005267 | GO:0045277 | GO:0030054 |
| 1944 | GO:0005244 | GO:0045275 | GO:0009312 |
| 1945 | GO:0005125 | GO:0045273 | GO:0032587 |
| 1946 | GO:0004693 | GO:0045271 | GO:0048699 |
| 1947 | GO:0004601 | GO:0045267 | GO:0001505 |
| 1948 | GO:0004497 | GO:0045263 | GO:0001845 |
| 1949 | GO:0004303 | GO:0002753 | GO:0002682 |
| 1950 | GO:0003073 | GO:0045261 | GO:0033198 |
| 1951 | GO:0002759 | GO:0045259 | GO:0044429 |
| 1952 | GO:0002039 | GO:0045257 | GO:0051899 |
| 1953 | GO:0001972 | GO:0045254 | GO:0006468 |
| 1954 | GO:0001963 | GO:0045252 | GO:0001937 |
| 1955 | GO:0001825 | GO:0045240 | GO:0030260 |
| 1956 | GO:0001701 | GO:0045239 | GO:0005546 |
| 1957 | GO:0001191 | GO:0045211 | GO:0090646 |

|      |                 |            |                 |
|------|-----------------|------------|-----------------|
| 1958 | GO:0001105      | GO:0045202 | GO:0001091      |
| 1959 | GO:0001085      | GO:0045178 | GO:0009991      |
| 1960 | GO:0000982      | GO:0002740 | GO:1901004      |
| 1961 | GO:0000980      | GO:0045177 | GO:0002070      |
| 1962 | GO:0000956      | GO:0045171 | GO:0046794      |
| 1963 | GO:0000794      | GO:0045121 | hsa04070        |
| 1964 | GO:0000784      | GO:0045120 | GO:1900115      |
| 1965 | GO:0000381      | GO:0044853 | GO:0014065      |
| 1966 | GO:0000178      | GO:0044815 | GO:0003674      |
| 1967 | GO:0000175      | GO:0044798 | GO:0030010      |
| 1968 | GO:0000077      | GO:0044665 | GO:0034110      |
| 1969 | ENSP00000395046 | GO:0044464 | GO:0000054      |
| 1970 | ENSP00000368244 | GO:0044463 | GO:0051174      |
| 1971 | ENSP00000307786 | GO:0002739 | GO:0003723      |
| 1972 | ENSP00000262367 | GO:0044459 | GO:0044260      |
| 1973 | ENSP00000206249 | GO:0044456 | GO:0002753      |
| 1974 | hsa05323        | GO:0044455 | GO:0001525      |
| 1975 | hsa04144        | GO:0044454 | ENSP00000304133 |
| 1976 | hsa04072        | GO:0044452 | GO:0019904      |
| 1977 | hsa00860        | GO:0044451 | GO:0002760      |
| 1978 | hsa00630        | GO:0044450 | GO:0031639      |
| 1979 | hsa00280        | GO:0044448 | GO:0090279      |
| 1980 | hsa00220        | GO:0044446 | GO:0051954      |
| 1981 | hsa00071        | GO:0044445 | GO:0060402      |
| 1982 | GO:2001252      | GO:0002719 | GO:0051588      |
| 1983 | GO:2001251      | GO:0044444 | GO:0050714      |
| 1984 | GO:2001026      | GO:0044441 | GO:1902626      |
| 1985 | GO:2000736      | GO:0044440 | GO:0002521      |
| 1986 | GO:2000144      | GO:0044439 | GO:0046950      |
| 1987 | GO:2000105      | GO:0044438 | GO:0010008      |
| 1988 | GO:1903909      | GO:0044437 | GO:0043405      |
| 1989 | GO:1903532      | GO:0044433 | GO:0043170      |
| 1990 | GO:1903523      | GO:0044432 | GO:0015934      |
| 1991 | GO:1903362      | GO:0044431 | GO:0009743      |
| 1992 | GO:1903335      | GO:0044430 | GO:0031859      |
| 1993 | GO:1903321      | GO:0002718 | GO:0009636      |
| 1994 | GO:1903050      | GO:0044429 | GO:0034112      |
| 1995 | GO:1903035      | GO:0044428 | GO:0045185      |
| 1996 | GO:1902495      | GO:0044427 | GO:0035929      |
| 1997 | GO:1902430      | GO:0044425 | GO:1904950      |
| 1998 | GO:1901987      | GO:0044424 | GO:0060193      |
| 1999 | GO:1901700      | GO:0044422 | GO:0009057      |
| 2000 | GO:1901343      | GO:0044421 | hsa05205        |
| 2001 | GO:1901070      | GO:0044420 | GO:0070011      |
| 2002 | GO:1900024      | GO:0044391 | GO:0072384      |
| 2003 | GO:0098609      | GO:0044309 | GO:0036376      |
| 2004 | GO:0090544      | GO:0002703 | GO:0009968      |
| 2005 | GO:0090261      | GO:0044306 | GO:0006887      |
| 2006 | GO:0090004      | GO:0044304 | GO:0030947      |
| 2007 | GO:0072659      | GO:0044298 | GO:0050776      |
| 2008 | GO:0072599      | GO:0044297 | GO:0006965      |
| 2009 | GO:0071549      | GO:0044291 | GO:0001180      |
| 2010 | GO:0071377      | GO:0043679 | GO:0002784      |

|      |            |            |            |
|------|------------|------------|------------|
| 2011 | GO:0070987 | GO:0043601 | GO:0001098 |
| 2012 | GO:0070933 | GO:0043596 | GO:0050848 |
| 2013 | GO:0070848 | GO:0043527 | GO:0031346 |
| 2014 | GO:0070633 | GO:0043296 | GO:0031011 |
| 2015 | GO:0070528 | GO:0002702 | GO:0099503 |
| 2016 | GO:0070507 | GO:0043235 | GO:0034330 |
| 2017 | GO:0070461 | GO:0043234 | GO:0031325 |
| 2018 | GO:0070266 | GO:0043233 | GO:0008298 |
| 2019 | GO:0070198 | GO:0043232 | GO:0071028 |
| 2020 | GO:0070125 | GO:0043231 | GO:0000470 |
| 2021 | GO:0065010 | GO:0043230 | GO:0000966 |
| 2022 | GO:0065004 | GO:0043229 | GO:0031401 |
| 2023 | GO:0061008 | GO:0043228 | GO:0050917 |
| 2024 | GO:0060627 | GO:0043227 | GO:0019083 |
| 2025 | GO:0060491 | GO:0043226 | GO:0050435 |
| 2026 | GO:0060325 | GO:0002701 | GO:0030336 |
| 2027 | GO:0060021 | GO:0043220 | GO:0051924 |
| 2028 | GO:0051785 | GO:0043209 | GO:0007275 |
| 2029 | GO:0051588 | GO:0043202 | GO:0023057 |
| 2030 | GO:0051571 | GO:0043198 | GO:0034663 |
| 2031 | GO:0051350 | GO:0043197 | GO:0048513 |
| 2032 | GO:0051045 | GO:0043194 | GO:0001012 |
| 2033 | GO:0050852 | GO:0043189 | GO:0050954 |
| 2034 | GO:0050840 | GO:0043025 | GO:0033674 |
| 2035 | GO:0050802 | GO:0043005 | GO:0018195 |
| 2036 | GO:0050707 | GO:0042995 | GO:0014061 |
| 2037 | GO:0050661 | GO:0002700 | GO:0046689 |
| 2038 | GO:0048878 | GO:0042827 | GO:0050794 |
| 2039 | GO:0048661 | GO:0042734 | GO:0006111 |
| 2040 | GO:0048039 | GO:0042645 | GO:0050789 |
| 2041 | GO:0048038 | GO:0042641 | GO:0050871 |
| 2042 | GO:0046883 | GO:0042599 | GO:0065007 |
| 2043 | GO:0046390 | GO:0042579 | GO:0070588 |
| 2044 | GO:0046364 | GO:0042567 | GO:0006979 |
| 2045 | GO:0046330 | GO:0042564 | GO:0002376 |
| 2046 | GO:0046164 | GO:0042470 | GO:0010563 |
| 2047 | GO:0045906 | GO:0042383 | GO:0008121 |
| 2048 | GO:0045335 | GO:0002699 | GO:0099536 |
| 2049 | GO:0045309 | GO:0042175 | GO:0060341 |
| 2050 | GO:0045185 | GO:0036477 | GO:0006474 |
| 2051 | GO:0044708 | GO:0036464 | GO:1901977 |
| 2052 | GO:0044706 | GO:0036454 | GO:0006909 |
| 2053 | GO:0044420 | GO:0036126 | GO:0007566 |
| 2054 | GO:0044270 | GO:0036019 | GO:0072509 |
| 2055 | GO:0044260 | GO:0035861 | GO:0010648 |
| 2056 | GO:0044058 | GO:0035770 | GO:0050755 |
| 2057 | GO:0043931 | GO:0035267 | GO:0051574 |
| 2058 | GO:0043903 | GO:0035098 | GO:0006357 |
| 2059 | GO:0043266 | GO:0002698 | GO:0048518 |
| 2060 | GO:0043244 | GO:0035097 | GO:0034109 |
| 2061 | GO:0043198 | GO:0034774 | GO:0032153 |
| 2062 | GO:0043085 | GO:0034708 | GO:0071635 |
| 2063 | GO:0042977 | GO:0034705 | GO:1901700 |

|      |            |            |                  |
|------|------------|------------|------------------|
| 2064 | GO:0042743 | GO:0034703 | GO:0004175       |
| 2065 | GO:0042734 | GO:0034702 | GO:0010604       |
| 2066 | GO:0042558 | GO:0034663 | GO:0002683       |
| 2067 | GO:0042533 | GO:0034457 | GO:0048856       |
| 2068 | GO:0042508 | GO:0034456 | GO:0048731       |
| 2069 | GO:0042455 | GO:0034455 | GO:0044767       |
| 2070 | GO:0042301 | GO:0002697 | GO:0043549       |
| 2071 | GO:0042246 | GO:0034399 | GO:0032502       |
| 2072 | GO:0042181 | GO:0034388 | GO:0001741       |
| 2073 | GO:0042015 | GO:0034366 | GO:0001179       |
| 2074 | GO:0035255 | GO:0034364 | GO:0044763       |
| 2075 | GO:0034754 | GO:0034358 | GO:0044699       |
| 2076 | GO:0034661 | GO:0033276 | GO:0002757       |
| 2077 | GO:0034655 | GO:0033267 | GO:0010727       |
| 2078 | GO:0034613 | GO:0033202 | GO:0050896       |
| 2079 | GO:0034113 | GO:0033186 | GO:0048522       |
| 2080 | GO:0034097 | GO:0033178 | GO:0043167       |
| 2081 | GO:0034086 | GO:0002696 | GO:0001775       |
| 2082 | GO:0033178 | GO:0033177 | GO:0030217       |
| 2083 | GO:0033047 | GO:0033116 | GO:0007043       |
| 2084 | GO:0032682 | GO:0032994 | GO:0048869       |
| 2085 | GO:0032496 | GO:0032993 | GO:0030154       |
| 2086 | GO:0032481 | GO:0032991 | GO:0032403       |
| 2087 | GO:0032446 | GO:0032806 | GO:0009888       |
| 2088 | GO:0032206 | GO:0032592 | GO:0009653       |
| 2089 | GO:0031572 | GO:0032589 | GO:0090092       |
| 2090 | GO:0031440 | GO:0032587 | GO:0009914       |
| 2091 | GO:0031396 | GO:0032580 | GO:0042060       |
| 2092 | GO:0031344 | GO:0002694 | GO:0042058       |
| 2093 | GO:0031307 | GO:0032545 | GO:0009019       |
| 2094 | GO:0031126 | GO:0032421 | GO:0034104       |
| 2095 | GO:0031123 | GO:0032420 | GO:0043968       |
| 2096 | GO:0031088 | GO:0032279 | GO:1903508       |
| 2097 | GO:0030914 | GO:0032155 | GO:0051173       |
| 2098 | GO:0030800 | GO:0032154 | GO:0045935       |
| 2099 | GO:0030665 | GO:0032153 | GO:0045893       |
| 2100 | GO:0030659 | GO:0032040 | GO:0042221       |
| 2101 | GO:0030199 | GO:0031988 | GO:1902680       |
| 2102 | GO:0030004 | GO:0031985 | GO:0051254       |
| 2103 | GO:0022891 | GO:0002690 | GO:0010557       |
| 2104 | GO:0022843 | GO:0031984 | GO:0010628       |
| 2105 | GO:0022804 | GO:0031983 | GO:0009891       |
| 2106 | GO:0022410 | GO:0031982 | GO:0031328       |
| 2107 | GO:0019932 | GO:0031981 | GO:0006366       |
| 2108 | GO:0019899 | GO:0031975 | GO:0000187       |
| 2109 | GO:0019395 | GO:0031974 | GO:0071867       |
| 2110 | GO:0019233 | GO:0031970 | GO:0031397       |
| 2111 | GO:0019222 | GO:0031968 | GO:0030913       |
| 2112 | GO:0017111 | GO:0031967 | GO:0060158       |
| 2113 | GO:0016616 | GO:0031966 | GO:0051276       |
| 2114 | GO:0016575 | GO:0002689 | GO:0007049       |
| 2115 | GO:0016525 | GO:0031965 | ENSP000000275820 |
| 2116 | GO:0016491 | GO:0031941 | GO:0044707       |



|      |            |            |                 |
|------|------------|------------|-----------------|
| 2117 | GO:0016469 | GO:0031907 | GO:0014069      |
| 2118 | GO:0016462 | GO:0031904 | GO:0035914      |
| 2119 | GO:0016458 | GO:0031903 | GO:0044428      |
| 2120 | GO:0016408 | GO:0031901 | GO:0031981      |
| 2121 | GO:0016281 | GO:0031588 | GO:0097110      |
| 2122 | GO:0015988 | GO:0031526 | GO:0042129      |
| 2123 | GO:0015959 | GO:0031519 | GO:0071803      |
| 2124 | GO:0015844 | GO:0031515 | GO:0042325      |
| 2125 | GO:0015491 | GO:0002688 | GO:0051052      |
| 2126 | GO:0015370 | GO:0031513 | GO:0006260      |
| 2127 | GO:0014812 | GO:0031461 | GO:0048519      |
| 2128 | GO:0010639 | GO:0031428 | GO:0044238      |
| 2129 | GO:0010608 | GO:0031410 | GO:0044237      |
| 2130 | GO:0010485 | GO:0031307 | GO:0071704      |
| 2131 | GO:0010248 | GO:0031306 | GO:0010562      |
| 2132 | GO:0010008 | GO:0031305 | hsa04660        |
| 2133 | GO:0009152 | GO:0031304 | GO:0009893      |
| 2134 | GO:0009142 | GO:0031301 | GO:0010033      |
| 2135 | GO:0009123 | GO:0031300 | GO:0001818      |
| 2136 | GO:0009058 | GO:0002687 | GO:0070887      |
| 2137 | GO:0008542 | GO:0031256 | ENSP00000416330 |
| 2138 | GO:0008066 | GO:0031253 | GO:0045121      |
| 2139 | GO:0007602 | GO:0031252 | ENSP00000409384 |
| 2140 | GO:0007588 | GO:0031248 | ENSP00000409074 |
| 2141 | GO:0007507 | GO:0031234 | ENSP00000408017 |
| 2142 | GO:0007275 | GO:0031232 | ENSP00000407515 |
| 2143 | GO:0007269 | GO:0031231 | ENSP00000402869 |
| 2144 | GO:0007267 | GO:0031228 | ENSP00000402802 |
| 2145 | GO:0007265 | GO:0031227 | ENSP00000402338 |
| 2146 | GO:0007220 | GO:0031226 | ENSP00000399753 |
| 2147 | GO:0007187 | GO:0002686 | ENSP00000399454 |
| 2148 | GO:0007099 | GO:0031225 | GO:0035556      |
| 2149 | GO:0007049 | GO:0031224 | ENSP00000398698 |
| 2150 | GO:0006999 | GO:0031213 | ENSP00000396454 |
| 2151 | GO:0006979 | GO:0031093 | ENSP00000395046 |
| 2152 | GO:0006956 | GO:0031091 | ENSP00000394290 |
| 2153 | GO:0006909 | GO:0031090 | ENSP00000393101 |
| 2154 | GO:0006874 | GO:0031088 | GO:0042306      |
| 2155 | GO:0006835 | GO:0031012 | ENSP00000386047 |
| 2156 | GO:0006734 | GO:0031011 | ENSP00000384302 |
| 2157 | GO:0006733 | GO:0031010 | ENSP00000381655 |
| 2158 | GO:0006704 | GO:0002685 | ENSP00000378857 |
| 2159 | GO:0006629 | GO:0030964 | ENSP00000377523 |
| 2160 | GO:0006606 | GO:0030934 | ENSP00000377446 |
| 2161 | GO:0006412 | GO:0030914 | ENSP00000374390 |
| 2162 | GO:0006344 | GO:0030894 | ENSP00000372199 |
| 2163 | GO:0006310 | GO:0030880 | GO:0070848      |
| 2164 | GO:0006144 | GO:0030864 | ENSP00000371169 |
| 2165 | GO:0006120 | GO:0030863 | ENSP00000371101 |
| 2166 | GO:0006091 | GO:0030849 | ENSP00000369647 |
| 2167 | GO:0005852 | GO:0030692 | ENSP00000368989 |
| 2168 | GO:0005684 | GO:0030689 | ENSP00000368887 |
| 2169 | GO:0005662 | GO:0002684 | ENSP00000368244 |

|      |                 |            |                 |
|------|-----------------|------------|-----------------|
| 2170 | GO:0005527      | GO:0030688 | ENSP00000367934 |
| 2171 | GO:0005520      | GO:0030687 | ENSP00000367361 |
| 2172 | GO:0005509      | GO:0030686 | ENSP00000366629 |
| 2173 | GO:0005215      | GO:0030684 | ENSP00000366623 |
| 2174 | GO:0005184      | GO:0030673 | ENSP00000364699 |
| 2175 | GO:0004900      | GO:0030670 | ENSP00000364037 |
| 2176 | GO:0003854      | GO:0030669 | ENSP00000363642 |
| 2177 | GO:0003697      | GO:0030667 | ENSP00000362873 |
| 2178 | GO:0003008      | GO:0030666 | ENSP00000362036 |
| 2179 | GO:0002862      | GO:0030665 | ENSP00000361965 |
| 2180 | GO:0002833      | GO:0002683 | ENSP00000361092 |
| 2181 | GO:0002700      | GO:0030662 | ENSP00000360412 |
| 2182 | GO:0002687      | GO:0030659 | ENSP00000360031 |
| 2183 | GO:0002478      | GO:0030529 | ENSP00000359688 |
| 2184 | GO:0002429      | GO:0030496 | ENSP00000358812 |
| 2185 | GO:0002062      | GO:0030425 | ENSP00000356953 |
| 2186 | GO:0002028      | GO:0030424 | ENSP00000356671 |
| 2187 | GO:0001816      | GO:0030315 | ENSP00000356548 |
| 2188 | GO:0001750      | GO:0030176 | ENSP00000356476 |
| 2189 | GO:0001738      | GO:0030175 | ENSP00000355987 |
| 2190 | GO:0001508      | GO:0030173 | ENSP00000355899 |
| 2191 | GO:0001077      | GO:0002682 | ENSP00000355443 |
| 2192 | GO:0000910      | GO:0030141 | ENSP00000355436 |
| 2193 | GO:0000792      | GO:0030140 | GO:0032388      |
| 2194 | GO:0000447      | GO:0030139 | ENSP00000352021 |
| 2195 | GO:0000226      | GO:0030136 | ENSP00000350720 |
| 2196 | ENSP00000362795 | GO:0030135 | ENSP00000350352 |
| 2197 | ENSP00000263321 | GO:0030133 | ENSP00000349142 |
| 2198 | hsa05168        | GO:0030055 | ENSP00000348722 |
| 2199 | hsa04670        | GO:0030054 | ENSP00000348596 |
| 2200 | hsa04330        | GO:0030027 | ENSP00000348170 |
| 2201 | hsa00982        | GO:0022627 | ENSP00000346839 |
| 2202 | hsa00620        | GO:0002673 | ENSP00000345317 |
| 2203 | hsa00601        | GO:0022626 | ENSP00000342056 |
| 2204 | hsa00410        | GO:0022625 | ENSP00000338862 |
| 2205 | hsa00380        | GO:0019908 | ENSP00000338573 |
| 2206 | hsa00260        | GO:0019898 | ENSP00000337518 |
| 2207 | hsa00140        | GO:0019897 | ENSP00000332340 |
| 2208 | GO:2001233      | GO:0019867 | ENSP00000331545 |
| 2209 | GO:2000377      | GO:0019866 | ENSP00000331111 |
| 2210 | GO:2000112      | GO:0017053 | ENSP00000330937 |
| 2211 | GO:2000058      | GO:0016942 | ENSP00000330737 |
| 2212 | GO:1904235      | GO:0016607 | GO:0001932      |
| 2213 | GO:1904064      | GO:0002639 | ENSP00000330460 |
| 2214 | GO:1904063      | GO:0016605 | ENSP00000330384 |
| 2215 | GO:1903753      | GO:0016604 | ENSP00000330341 |
| 2216 | GO:1903729      | GO:0016602 | ENSP00000330049 |
| 2217 | GO:1903307      | GO:0016592 | ENSP00000328671 |
| 2218 | GO:1903169      | GO:0016591 | ENSP00000327179 |
| 2219 | GO:1903036      | GO:0016589 | ENSP00000327070 |
| 2220 | GO:1902004      | GO:0016581 | ENSP00000325128 |
| 2221 | GO:1901699      | GO:0016580 | ENSP00000323612 |
| 2222 | GO:1901615      | GO:0016514 | ENSP00000322088 |

|      |            |            |                 |
|------|------------|------------|-----------------|
| 2223 | GO:1901407 | GO:0016469 | ENSP00000321426 |
| 2224 | GO:1901135 | GO:0002576 | ENSP00000321320 |
| 2225 | GO:1900542 | GO:0016363 | ENSP00000321246 |
| 2226 | GO:0098552 | GO:0016328 | ENSP00000320917 |
| 2227 | GO:0097458 | GO:0016327 | ENSP00000320567 |
| 2228 | GO:0097367 | GO:0016324 | ENSP00000317992 |
| 2229 | GO:0097346 | GO:0016323 | ENSP00000311135 |
| 2230 | GO:0090197 | GO:0016281 | ENSP00000311038 |
| 2231 | GO:0090185 | GO:0016023 | ENSP00000310668 |
| 2232 | GO:0071902 | GO:0016021 | ENSP00000310337 |
| 2233 | GO:0071867 | GO:0016020 | ENSP00000310042 |
| 2234 | GO:0071565 | GO:0015935 | ENSP00000308270 |
| 2235 | GO:0071345 | GO:0002548 | ENSP00000308179 |
| 2236 | GO:0071260 | GO:0015934 | ENSP00000307786 |
| 2237 | GO:0070972 | GO:0015630 | ENSP00000307525 |
| 2238 | GO:0070851 | GO:0015629 | ENSP00000307130 |
| 2239 | GO:0070167 | GO:0015030 | ENSP00000306095 |
| 2240 | GO:0070161 | GO:0014704 | ENSP00000304419 |
| 2241 | GO:0065002 | GO:0014069 | GO:0032869      |
| 2242 | GO:0061448 | GO:0012506 | ENSP00000304151 |
| 2243 | GO:0061028 | GO:0012505 | ENSP00000303515 |
| 2244 | GO:0060350 | GO:0010008 | ENSP00000303076 |
| 2245 | GO:0060070 | GO:0009986 | ENSP00000300773 |
| 2246 | GO:0060047 | GO:0002526 | ENSP00000298746 |
| 2247 | GO:0051984 | GO:0009925 | ENSP00000297579 |
| 2248 | GO:0051928 | GO:0009898 | ENSP00000296099 |
| 2249 | GO:0051569 | GO:0009897 | ENSP00000291576 |
| 2250 | GO:0051459 | GO:0009295 | ENSP00000290866 |
| 2251 | GO:0051427 | GO:0008328 | ENSP00000290299 |
| 2252 | GO:0051261 | GO:0008024 | ENSP00000287022 |
| 2253 | GO:0051223 | GO:0008023 | ENSP00000282050 |
| 2254 | GO:0050951 | GO:0005947 | ENSP00000276689 |
| 2255 | GO:0050804 | GO:0005938 | ENSP00000276585 |
| 2256 | GO:0050801 | GO:0005929 | ENSP00000268854 |
| 2257 | GO:0050776 | GO:0002521 | ENSP00000268802 |
| 2258 | GO:0050681 | GO:0005925 | ENSP00000268668 |
| 2259 | GO:0048871 | GO:0005924 | ENSP00000268379 |
| 2260 | GO:0048863 | GO:0005923 | ENSP00000267425 |
| 2261 | GO:0048667 | GO:0005912 | ENSP00000265245 |
| 2262 | GO:0048646 | GO:0005911 | ENSP00000263774 |
| 2263 | GO:0048568 | GO:0005905 | ENSP00000263321 |
| 2264 | GO:0048471 | GO:0005903 | ENSP00000263253 |
| 2265 | GO:0048260 | GO:0005902 | ENSP00000262607 |
| 2266 | GO:0048009 | GO:0005901 | GO:0001817      |
| 2267 | GO:0046875 | GO:0005900 | ENSP00000262367 |
| 2268 | GO:0046873 | GO:0002520 | ENSP00000261741 |
| 2269 | GO:0046102 | GO:0005896 | ENSP00000261708 |
| 2270 | GO:0045926 | GO:0005887 | ENSP00000261015 |
| 2271 | GO:0045834 | GO:0005886 | ENSP00000260563 |
| 2272 | GO:0045778 | GO:0005884 | ENSP00000260227 |
| 2273 | GO:0045760 | GO:0005879 | ENSP00000258531 |
| 2274 | GO:0045582 | GO:0005876 | ENSP00000258424 |
| 2275 | GO:0045202 | GO:0005875 | ENSP00000253237 |

|      |            |            |                 |
|------|------------|------------|-----------------|
| 2276 | GO:0045187 | GO:0005874 | ENSP00000252711 |
| 2277 | GO:0045177 | GO:0005856 | ENSP00000251289 |
| 2278 | GO:0045005 | GO:0005852 | ENSP00000249269 |
| 2279 | GO:0044325 | GO:0002504 | ENSP00000244496 |
| 2280 | GO:0044243 | GO:0005840 | ENSP00000244230 |
| 2281 | GO:0044089 | GO:0005834 | GO:0010976      |
| 2282 | GO:0044033 | GO:0005829 | ENSP00000233190 |
| 2283 | GO:0043974 | GO:0005819 | ENSP00000233114 |
| 2284 | GO:0043967 | GO:0005815 | ENSP00000232888 |
| 2285 | GO:0043921 | GO:0005814 | ENSP00000231751 |
| 2286 | GO:0043632 | GO:0005813 | ENSP00000230640 |
| 2287 | GO:0043628 | GO:0005802 | GO:0008286      |
| 2288 | GO:0043627 | GO:0005798 | ENSP00000230340 |
| 2289 | GO:0043388 | GO:0005797 | ENSP00000222567 |
| 2290 | GO:0043267 | GO:0002495 | ENSP00000216492 |
| 2291 | GO:0042699 | GO:0005796 | ENSP00000215375 |
| 2292 | GO:0042635 | GO:0005795 | ENSP00000209540 |
| 2293 | GO:0042273 | GO:0005794 | ENSP00000206249 |
| 2294 | GO:0042130 | GO:0005793 | ENSP00000203407 |
| 2295 | GO:0042102 | GO:0005791 | ENSP00000203001 |
| 2296 | GO:0035988 | GO:0005790 | GO:1990583      |
| 2297 | GO:0035929 | GO:0005789 | GO:1904929      |
| 2298 | GO:0035567 | GO:0005788 | GO:1902936      |
| 2299 | GO:0035250 | GO:0005783 | GO:1901981      |
| 2300 | GO:0035097 | GO:0005782 | GO:1901265      |
| 2301 | GO:0034765 | GO:0002479 | GO:0099528      |
| 2302 | GO:0034705 | GO:0005779 | GO:0099516      |
| 2303 | GO:0034248 | GO:0005778 | GO:0098811      |
| 2304 | GO:0034116 | GO:0005777 | GO:0098772      |
| 2305 | GO:0034112 | GO:0005776 | GO:0098631      |
| 2306 | GO:0033993 | GO:0005775 | GO:0071987      |
| 2307 | GO:0033617 | GO:0005774 | GO:0071837      |
| 2308 | GO:0033139 | GO:0005773 | GO:0071535      |
| 2309 | GO:0033044 | GO:0005770 | GO:0070615      |
| 2310 | GO:0032946 | GO:0005769 | GO:0070612      |
| 2311 | GO:0032587 | GO:0005768 | GO:0070577      |
| 2312 | GO:0032388 | GO:0002478 | GO:0070491      |
| 2313 | GO:0032098 | GO:0005765 | GO:0070119      |
| 2314 | GO:0031995 | GO:0005764 | GO:0070035      |
| 2315 | GO:0031859 | GO:0005763 | GO:0061659      |
| 2316 | GO:0031667 | GO:0005762 | GO:0046649      |
| 2317 | GO:0031625 | GO:0005761 | GO:0061630      |
| 2318 | GO:0031410 | GO:0005759 | GO:0061135      |
| 2319 | GO:0031347 | GO:0005758 | GO:0060090      |
| 2320 | GO:0031279 | GO:0005754 | GO:0052909      |
| 2321 | GO:0031252 | GO:0005753 | GO:0052890      |
| 2322 | GO:0031234 | GO:0005751 | GO:0052689      |
| 2323 | GO:0031012 | GO:0002474 | GO:0051996      |
| 2324 | GO:0030865 | GO:0005750 | GO:0051540      |
| 2325 | GO:0030864 | GO:0005749 | GO:0032270      |
| 2326 | GO:0030855 | GO:0005747 | GO:0051539      |
| 2327 | GO:0030492 | GO:0005746 | GO:0051427      |
| 2328 | GO:0030414 | GO:0005744 | GO:0051219      |

|      |            |            |            |
|------|------------|------------|------------|
| 2329 | GO:0030301 | GO:0005743 | GO:0051192 |
| 2330 | GO:0030260 | GO:0005742 | GO:0051082 |
| 2331 | GO:0030219 | GO:0005741 | GO:0051020 |
| 2332 | GO:0030204 | GO:0005740 | GO:0051015 |
| 2333 | GO:0030195 | GO:0005739 | GO:0050840 |
| 2334 | GO:0023052 | GO:0002460 | GO:0050839 |
| 2335 | GO:0022409 | GO:0005737 | GO:0050780 |
| 2336 | GO:0019852 | GO:0005736 | GO:0050681 |
| 2337 | GO:0019682 | GO:0005732 | GO:0050661 |
| 2338 | GO:0019083 | GO:0005730 | GO:0050660 |
| 2339 | GO:0019003 | GO:0005721 | GO:0050178 |
| 2340 | GO:0018171 | GO:0005720 | GO:0048040 |
| 2341 | GO:0018024 | GO:0005719 | GO:0048038 |
| 2342 | GO:0018022 | GO:0005697 | GO:0047696 |
| 2343 | GO:0017171 | GO:0005694 | GO:0046983 |
| 2344 | GO:0017025 | GO:0005684 | GO:0046982 |
| 2345 | GO:0017022 | GO:0002455 | GO:0046966 |
| 2346 | GO:0016863 | GO:0005681 | GO:0046961 |
| 2347 | GO:0016742 | GO:0005677 | GO:0046912 |
| 2348 | GO:0016634 | GO:0005675 | GO:0046875 |
| 2349 | GO:0016573 | GO:0005672 | GO:0046873 |
| 2350 | GO:0016572 | GO:0005671 | GO:0046554 |
| 2351 | GO:0016310 | GO:0005669 | GO:0045309 |
| 2352 | GO:0016075 | GO:0005667 | GO:0045155 |
| 2353 | GO:0016064 | GO:0005666 | GO:0044822 |
| 2354 | GO:0016032 | GO:0005664 | GO:0044620 |
| 2355 | GO:0015718 | GO:0005662 | GO:0044212 |
| 2356 | GO:0015293 | GO:0002449 | GO:0043997 |
| 2357 | GO:0015288 | GO:0005657 | GO:0043783 |
| 2358 | GO:0015103 | GO:0005654 | GO:0043544 |
| 2359 | GO:0015079 | GO:0005643 | GO:0043531 |
| 2360 | GO:0015077 | GO:0005635 | GO:0043426 |
| 2361 | GO:0014821 | GO:0005634 | GO:0043394 |
| 2362 | GO:0010976 | GO:0005623 | GO:0043185 |
| 2363 | GO:0010959 | GO:0005622 | GO:0043177 |
| 2364 | GO:0010828 | GO:0005615 | GO:0048010 |
| 2365 | GO:0010727 | GO:0005614 | GO:0043169 |
| 2366 | GO:0010634 | GO:0005604 | GO:0043021 |
| 2367 | GO:0010563 | GO:0002446 | GO:0043015 |
| 2368 | GO:0010501 | GO:0005596 | GO:0042826 |
| 2369 | GO:0010455 | GO:0005593 | GO:0042809 |
| 2370 | GO:0010453 | GO:0005581 | GO:0042803 |
| 2371 | GO:0009925 | GO:0005578 | GO:0042626 |
| 2372 | GO:0009746 | GO:0005577 | GO:0042623 |
| 2373 | GO:0009612 | GO:0005576 | GO:0042608 |
| 2374 | GO:0009607 | GO:0005575 | GO:0042393 |
| 2375 | GO:0009119 | GO:0001940 | GO:0042301 |
| 2376 | GO:0009063 | GO:0001939 | GO:0042162 |
| 2377 | GO:0008378 | GO:0001917 | GO:0042134 |
| 2378 | GO:0008328 | GO:0002443 | GO:0044087 |
| 2379 | GO:0008286 | GO:0001772 | GO:0042056 |
| 2380 | GO:0008177 | GO:0001750 | GO:0042020 |
| 2381 | GO:0008024 | GO:0001741 | GO:0042015 |

|      |            |            |            |
|------|------------|------------|------------|
| 2382 | GO:0007635 | GO:0001726 | GO:0038164 |
| 2383 | GO:0007611 | GO:0001652 | GO:0038024 |
| 2384 | GO:0007606 | GO:0001650 | GO:0036442 |
| 2385 | GO:0007597 | GO:0000940 | GO:0036002 |
| 2386 | GO:0007565 | GO:0000939 | GO:0035591 |
| 2387 | GO:0007411 | GO:0000932 | GO:0035326 |
| 2388 | GO:0007205 | GO:0000930 | GO:0035257 |
| 2389 | GO:0007191 | GO:0002440 | GO:0035250 |
| 2390 | GO:0007189 | GO:0000922 | GO:0035091 |
| 2391 | GO:0007173 | GO:0000812 | GO:0035035 |
| 2392 | GO:0007155 | GO:0000808 | GO:0034714 |
| 2393 | GO:0007094 | GO:0000806 | GO:0034604 |
| 2394 | GO:0006913 | GO:0000805 | GO:0080134 |
| 2395 | GO:0006885 | GO:0000803 | GO:0034603 |
| 2396 | GO:0006833 | GO:0000794 | GO:0034602 |
| 2397 | GO:0006812 | GO:0000793 | GO:0034513 |
| 2398 | GO:0006775 | GO:0000792 | GO:0034511 |
| 2399 | GO:0006744 | GO:0000791 | GO:0034212 |
| 2400 | GO:0006518 | GO:0002433 | GO:0033764 |
| 2401 | GO:0006417 | GO:0000790 | GO:0033613 |
| 2402 | GO:0006413 | GO:0000788 | GO:0033218 |
| 2403 | GO:0006397 | GO:0000786 | GO:0032947 |
| 2404 | GO:0006302 | GO:0000785 | GO:0032555 |
| 2405 | GO:0006301 | GO:0000784 | GO:0032451 |
| 2406 | GO:0006222 | GO:0000781 | GO:0032041 |
| 2407 | GO:0006163 | GO:0000779 | GO:0018108 |
| 2408 | GO:0006154 | GO:0000777 | GO:0031995 |
| 2409 | GO:0006123 | GO:0000776 | GO:0031994 |
| 2410 | GO:0006082 | GO:0000775 | GO:0031896 |
| 2411 | GO:0006007 | GO:0002431 | GO:0031826 |
| 2412 | GO:0005879 | GO:0000428 | GO:0031821 |
| 2413 | GO:0005697 | GO:0000323 | GO:0031762 |
| 2414 | GO:0005694 | GO:0000315 | GO:0031748 |
| 2415 | GO:0005102 | GO:0000314 | GO:0031701 |
| 2416 | GO:0004924 | GO:0000313 | GO:0031700 |
| 2417 | GO:0004867 | GO:0000307 | GO:0031692 |
| 2418 | GO:0004769 | GO:0000276 | GO:0031691 |
| 2419 | GO:0004672 | GO:0000275 | GO:0031625 |
| 2420 | GO:0004468 | GO:0000242 | GO:0031492 |
| 2421 | GO:0003994 | GO:0000228 | GO:0031491 |
| 2422 | GO:0003899 | GO:0002429 | GO:0031489 |
| 2423 | GO:0003857 | GO:0000178 | GO:0031420 |
| 2424 | GO:0003705 | GO:0000177 | GO:0031406 |
| 2425 | GO:0003012 | GO:0000176 | GO:0031386 |
| 2426 | GO:0002753 | GO:0000152 | GO:0030731 |
| 2427 | GO:0002683 | GO:0000151 | GO:0030697 |
| 2428 | GO:0002460 | GO:0000139 | GO:0030696 |
| 2429 | GO:0002443 | GO:0000138 | GO:0030695 |
| 2430 | GO:0002433 | GO:0000125 | GO:0030594 |
| 2431 | GO:0001937 | GO:0000123 | GO:0030554 |
| 2432 | GO:0001883 | GO:0000118 | GO:0030523 |
| 2433 | GO:0001840 | GO:0002385 | GO:0030515 |
| 2434 | GO:0001653 | GO:2001257 | GO:0030492 |

|      |                 |            |            |
|------|-----------------|------------|------------|
| 2435 | GO:0001501      | GO:2001252 | GO:0030414 |
| 2436 | GO:0001067      | GO:2001251 | GO:0030246 |
| 2437 | GO:0000975      | GO:2001237 | GO:0030234 |
| 2438 | GO:0000959      | GO:2001236 | GO:0030159 |
| 2439 | GO:0000803      | GO:2001233 | GO:0030060 |
| 2440 | GO:0000377      | GO:2001202 | GO:0022890 |
| 2441 | GO:0000228      | GO:2001201 | GO:0022843 |
| 2442 | GO:0000062      | GO:2001141 | GO:0022834 |
| 2443 | GO:0000054      | GO:2001027 | GO:0022829 |
| 2444 | ENSP00000370968 | GO:0002384 | GO:0019981 |
| 2445 | ENSP00000365663 | GO:2001026 | GO:0019969 |
| 2446 | ENSP00000233114 | GO:2001022 | GO:0019962 |
| 2447 | hsa05150        | GO:2001020 | GO:0019961 |
| 2448 | hsa04972        | GO:2000870 | GO:0019955 |
| 2449 | hsa04933        | GO:2000833 | GO:0019901 |
| 2450 | hsa04921        | GO:2000816 | GO:0019900 |
| 2451 | hsa04740        | GO:2000785 | GO:0019843 |
| 2452 | hsa04727        | GO:2000779 | GO:0019840 |
| 2453 | hsa04512        | GO:2000757 | GO:0019838 |
| 2454 | hsa04510        | GO:2000756 | GO:0018212 |
| 2455 | GO:2001237      | GO:0002377 | GO:0019789 |
| 2456 | GO:2001022      | GO:2000736 | GO:0019213 |
| 2457 | GO:2000351      | GO:2000649 | GO:0019205 |
| 2458 | GO:2000258      | GO:2000644 | GO:0017171 |
| 2459 | GO:1904929      | GO:2000617 | GO:0017137 |
| 2460 | GO:1904816      | GO:2000615 | GO:0017124 |
| 2461 | GO:1904814      | GO:2000546 | GO:0017076 |
| 2462 | GO:1903707      | GO:2000544 | GO:0017069 |
| 2463 | GO:1903322      | GO:2000404 | GO:0017056 |
| 2464 | GO:1903320      | GO:2000403 | GO:0017025 |
| 2465 | GO:1903076      | GO:2000401 | GO:0017016 |
| 2466 | GO:1902652      | GO:0002376 | GO:0009612 |
| 2467 | GO:1901652      | GO:2000377 | GO:0016907 |
| 2468 | GO:1901362      | GO:2000352 | GO:0016896 |
| 2469 | GO:1901360      | GO:2000351 | GO:0016878 |
| 2470 | GO:1901068      | GO:2000296 | GO:0016874 |
| 2471 | GO:1900426      | GO:2000258 | GO:0016863 |
| 2472 | GO:0098739      | GO:2000257 | GO:0071417 |
| 2473 | GO:0098660      | GO:2000181 | GO:0016853 |
| 2474 | GO:0090109      | GO:2000147 | GO:0016836 |
| 2475 | GO:0090042      | GO:2000146 | GO:0016832 |
| 2476 | GO:0090025      | GO:2000145 | GO:0016830 |
| 2477 | GO:0072677      | GO:0002374 | GO:0016829 |
| 2478 | GO:0072676      | GO:2000144 | GO:0016818 |
| 2479 | GO:0072376      | GO:2000142 | GO:0016817 |
| 2480 | GO:0071837      | GO:2000134 | GO:0016810 |
| 2481 | GO:0071548      | GO:2000113 | GO:0016791 |
| 2482 | GO:0070741      | GO:2000112 | GO:0016787 |
| 2483 | GO:0070670      | GO:2000105 | GO:0016779 |
| 2484 | GO:0070613      | GO:2000098 | GO:0016757 |
| 2485 | GO:0070612      | GO:2000097 | GO:0016751 |
| 2486 | GO:0070525      | GO:2000060 | GO:0016684 |
| 2487 | GO:0070469      | GO:2000058 | GO:0016681 |

|      |            |            |            |
|------|------------|------------|------------|
| 2488 | GO:0070168 | GO:0002367 | GO:0016679 |
| 2489 | GO:0070124 | GO:2000045 | GO:0016668 |
| 2490 | GO:0061029 | GO:2000027 | GO:0016655 |
| 2491 | GO:0060396 | GO:2000026 | GO:0016649 |
| 2492 | GO:0060346 | GO:2000021 | GO:0016645 |
| 2493 | GO:0060218 | GO:2000002 | GO:0016635 |
| 2494 | GO:0060029 | GO:2000001 | GO:0016634 |
| 2495 | GO:0051918 | GO:1990778 | GO:0016628 |
| 2496 | GO:0051641 | GO:1990748 | GO:0044093 |
| 2497 | GO:0051539 | GO:1990542 | GO:0016627 |
| 2498 | GO:0051437 | GO:1990481 | GO:0016624 |
| 2499 | GO:0051254 | GO:0002360 | GO:0016608 |
| 2500 | GO:0051241 | GO:1990402 | GO:0016597 |
| 2501 | GO:0051057 | GO:1990266 | GO:0016509 |
| 2502 | GO:0051053 | GO:1904951 | GO:0016462 |
| 2503 | GO:0051052 | GO:1904950 | GO:0016436 |
| 2504 | GO:0050999 | GO:1904894 | GO:0016435 |
| 2505 | GO:0050918 | GO:1904892 | GO:0016433 |
| 2506 | GO:0050907 | GO:1904874 | GO:0051130 |
| 2507 | GO:0050896 | GO:1904851 | GO:0016429 |
| 2508 | GO:0050865 | GO:1904849 | GO:0016428 |
| 2509 | GO:0050851 | GO:1904847 | GO:0016426 |
| 2510 | GO:0050839 | GO:0002253 | GO:0016423 |
| 2511 | GO:0050730 | GO:1904816 | GO:0016408 |
| 2512 | GO:0050729 | GO:1904814 | GO:0016300 |
| 2513 | GO:0050662 | GO:1904667 | GO:0016298 |
| 2514 | GO:0050432 | GO:1904666 | GO:0016279 |
| 2515 | GO:0048858 | GO:1904591 | GO:0016273 |
| 2516 | GO:0048705 | GO:1904377 | GO:0016229 |
| 2517 | GO:0048589 | GO:1904375 | GO:0016209 |
| 2518 | GO:0048531 | GO:1904237 | GO:0016150 |
| 2519 | GO:0048523 | GO:1904235 | GO:0015491 |
| 2520 | GO:0048521 | GO:1904064 | GO:0015464 |
| 2521 | GO:0048146 | GO:0002252 | GO:0015459 |
| 2522 | GO:0048011 | GO:1904063 | GO:0015405 |
| 2523 | GO:0048010 | GO:1904062 | GO:0015399 |
| 2524 | GO:0046949 | GO:1904036 | GO:0015370 |
| 2525 | GO:0046928 | GO:1904035 | GO:0015298 |
| 2526 | GO:0046906 | GO:1904029 | GO:0015296 |
| 2527 | GO:0046697 | GO:1904018 | GO:0015288 |
| 2528 | GO:0046502 | GO:1903911 | GO:0015266 |
| 2529 | GO:0045995 | GO:1903909 | GO:0015108 |
| 2530 | GO:0045981 | GO:1903902 | GO:0015103 |
| 2531 | GO:0045786 | GO:1903900 | GO:0015081 |
| 2532 | GO:0045732 | GO:0002251 | GO:0015079 |
| 2533 | GO:0045637 | GO:1903845 | GO:0015077 |
| 2534 | GO:0045619 | GO:1903844 | GO:0015036 |
| 2535 | GO:0045137 | GO:1903793 | GO:0010576 |
| 2536 | GO:0045120 | GO:1903753 | GO:0010485 |
| 2537 | GO:0044770 | GO:1903751 | GO:0010484 |
| 2538 | GO:0044769 | GO:1903750 | GO:0009055 |
| 2539 | GO:0044728 | GO:1903729 | GO:0008988 |
| 2540 | GO:0044665 | GO:1903725 | GO:0008757 |



|      |            |            |            |
|------|------------|------------|------------|
| 2541 | GO:0044344 | GO:1903707 | GO:0008650 |
| 2542 | GO:0044271 | GO:1903706 | GO:0008556 |
| 2543 | GO:0044205 | GO:0002250 | GO:0008545 |
| 2544 | GO:0043970 | GO:1903651 | GO:0008536 |
| 2545 | GO:0043565 | GO:1903649 | GO:0008509 |
| 2546 | GO:0043425 | GO:1903557 | GO:0008495 |
| 2547 | GO:0043412 | GO:1903555 | GO:0008401 |
| 2548 | GO:0043086 | GO:1903532 | GO:0008395 |
| 2549 | GO:0043005 | GO:1903531 | GO:0008378 |
| 2550 | GO:0042886 | GO:1903530 | GO:0008353 |
| 2551 | GO:0042809 | GO:1903524 | GO:0008236 |
| 2552 | GO:0042802 | GO:1903523 | GO:0008186 |
| 2553 | GO:0042773 | GO:1903522 | GO:0008177 |
| 2554 | GO:0042744 | GO:0002244 | GO:0008171 |
| 2555 | GO:0042641 | GO:1903513 | GO:0008170 |
| 2556 | GO:0042608 | GO:1903510 | GO:0008168 |
| 2557 | GO:0042517 | GO:1903509 | GO:0008134 |
| 2558 | GO:0042445 | GO:1903508 | GO:1901699 |
| 2559 | GO:0042278 | GO:1903507 | GO:0008094 |
| 2560 | GO:0042255 | GO:1903506 | GO:0008083 |
| 2561 | GO:0042127 | GO:1903426 | GO:0008080 |
| 2562 | GO:0042060 | GO:1903409 | GO:0008066 |
| 2563 | GO:0042036 | GO:1903364 | GO:0008047 |
| 2564 | GO:0036464 | GO:1903362 | GO:0008017 |
| 2565 | GO:0036314 | GO:0002227 | GO:0008009 |
| 2566 | GO:0036094 | GO:1903337 | GO:0008283 |
| 2567 | GO:0035987 | GO:1903335 | GO:0005525 |
| 2568 | GO:0035630 | GO:1903322 | GO:0005524 |
| 2569 | GO:0035601 | GO:1903321 | GO:0005520 |
| 2570 | GO:0035556 | GO:1903320 | GO:0005518 |
| 2571 | GO:0035326 | GO:1903318 | GO:0005516 |
| 2572 | GO:0035098 | GO:1903317 | GO:0005506 |
| 2573 | GO:0034728 | GO:1903313 | GO:0005501 |
| 2574 | GO:0034644 | GO:1903312 | GO:0005488 |
| 2575 | GO:0034641 | GO:1903311 | GO:0005391 |
| 2576 | GO:0034440 | GO:0002225 | GO:0005342 |
| 2577 | GO:0034104 | GO:1903310 | GO:0005267 |
| 2578 | GO:0033273 | GO:1903309 | GO:0005262 |
| 2579 | GO:0033138 | GO:1903308 | GO:0005246 |
| 2580 | GO:0032984 | GO:1903307 | GO:0005215 |
| 2581 | GO:0032967 | GO:1903305 | GO:0005198 |
| 2582 | GO:0032802 | GO:1903279 | GO:0005138 |
| 2583 | GO:0032642 | GO:1903169 | GO:0005126 |
| 2584 | GO:0032589 | GO:1903078 | GO:0005125 |
| 2585 | GO:0032555 | GO:1903076 | GO:0005109 |
| 2586 | GO:0032434 | GO:1903055 | GO:0005104 |
| 2587 | GO:0032409 | GO:0002223 | GO:0004993 |
| 2588 | GO:0032310 | GO:1903052 | GO:0004924 |
| 2589 | GO:0032101 | GO:1903051 | GO:0004923 |
| 2590 | GO:0031960 | GO:1903050 | GO:0004917 |
| 2591 | GO:0031904 | GO:1903047 | GO:0004915 |
| 2592 | GO:0031691 | GO:1903039 | GO:0004914 |
| 2593 | GO:0031529 | GO:1903037 | GO:0004913 |

|      |            |            |            |
|------|------------|------------|------------|
| 2594 | GO:0031490 | GO:1903036 | GO:0004912 |
| 2595 | GO:0031420 | GO:1903035 | GO:0000302 |
| 2596 | GO:0031346 | GO:1903034 | GO:0004906 |
| 2597 | GO:0031331 | GO:1903019 | GO:0004900 |
| 2598 | GO:0031294 | GO:0002181 | GO:0004897 |
| 2599 | GO:0031214 | GO:1903008 | GO:0004867 |
| 2600 | GO:0031167 | GO:1902998 | GO:0004866 |
| 2601 | GO:0031124 | GO:1902996 | GO:0004842 |
| 2602 | GO:0031078 | GO:1902993 | GO:0004809 |
| 2603 | GO:0031057 | GO:1902988 | GO:0004776 |
| 2604 | GO:0031056 | GO:1902953 | GO:0004769 |
| 2605 | GO:0030894 | GO:1902949 | GO:0004738 |
| 2606 | GO:0030815 | GO:1902947 | GO:0004721 |
| 2607 | GO:0030666 | GO:1902946 | GO:0004703 |
| 2608 | GO:0030595 | GO:1902850 | GO:0004693 |
| 2609 | GO:0030554 | GO:0002128 | GO:0043491 |
| 2610 | GO:0030521 | GO:1902847 | GO:0004674 |
| 2611 | GO:0030518 | GO:1902824 | GO:0004620 |
| 2612 | GO:0030514 | GO:1902822 | GO:0004602 |
| 2613 | GO:0030193 | GO:1902807 | GO:0004601 |
| 2614 | GO:0030183 | GO:1902806 | GO:0004468 |
| 2615 | GO:0030111 | GO:1902774 | GO:0051129 |
| 2616 | GO:0030003 | GO:1902750 | GO:0004448 |
| 2617 | GO:0030001 | GO:1902749 | GO:0004407 |
| 2618 | GO:0022626 | GO:1902680 | GO:0004385 |
| 2619 | GO:0022604 | GO:1902679 | GO:0004362 |
| 2620 | GO:0022402 | GO:0002092 | GO:0004333 |
| 2621 | GO:0019985 | GO:1902656 | GO:0004311 |
| 2622 | GO:0019941 | GO:1902653 | GO:0004300 |
| 2623 | GO:0019320 | GO:1902652 | GO:0004252 |
| 2624 | GO:0018394 | GO:1902626 | GO:0004174 |
| 2625 | GO:0018146 | GO:1902624 | GO:0004169 |
| 2626 | GO:0017160 | GO:1902622 | GO:0004152 |
| 2627 | GO:0016879 | GO:1902600 | GO:0004149 |
| 2628 | GO:0016773 | GO:1902593 | GO:0004148 |
| 2629 | GO:0016614 | GO:1902589 | GO:0004129 |
| 2630 | GO:0016570 | GO:1902583 | GO:0004108 |
| 2631 | GO:0016229 | GO:0002090 | GO:0004096 |
| 2632 | GO:0016115 | GO:1902582 | GO:0004045 |
| 2633 | GO:0016023 | GO:1902580 | GO:0004004 |
| 2634 | GO:0015294 | GO:1902579 | GO:0004003 |
| 2635 | GO:0014823 | GO:1902578 | hsa05142   |
| 2636 | GO:0010863 | GO:1902572 | GO:0003994 |
| 2637 | GO:0010811 | GO:1902571 | GO:0003988 |
| 2638 | GO:0010644 | GO:1902533 | GO:0003963 |
| 2639 | GO:0010575 | GO:1902531 | GO:0003954 |
| 2640 | GO:0010564 | GO:1902476 | GO:0003938 |
| 2641 | GO:0010510 | GO:1902430 | GO:0003924 |
| 2642 | GO:0009952 | GO:0002070 | GO:0003878 |
| 2643 | GO:0009896 | GO:1902403 | GO:0003857 |
| 2644 | GO:0009892 | GO:1902402 | GO:0010035 |
| 2645 | GO:0009889 | GO:1902400 | GO:0003854 |
| 2646 | GO:0009725 | GO:1902305 | GO:0003727 |

|      |            |            |            |
|------|------------|------------|------------|
| 2647 | GO:0009584 | GO:1902275 | GO:0003724 |
| 2648 | GO:0009312 | GO:1902224 | GO:0003714 |
| 2649 | GO:0009201 | GO:1902115 | GO:0003712 |
| 2650 | GO:0009127 | GO:1902106 | GO:0003690 |
| 2651 | GO:0009126 | GO:1902105 | GO:0002046 |
| 2652 | GO:0009124 | GO:1902100 | GO:0001972 |
| 2653 | GO:0009066 | GO:0002064 | GO:0001968 |
| 2654 | GO:0008217 | GO:1902099 | GO:0001948 |
| 2655 | GO:0008209 | GO:1902042 | GO:0001883 |
| 2656 | GO:0008202 | GO:1902004 | GO:0001664 |
| 2657 | GO:0008191 | GO:1901998 | GO:0001653 |
| 2658 | GO:0008135 | GO:1901992 | GO:0001567 |
| 2659 | GO:0008134 | GO:1901991 | GO:1903651 |
| 2660 | GO:0008015 | GO:1901990 | GO:0001532 |
| 2661 | GO:0007628 | GO:1901989 | GO:0001228 |
| 2662 | GO:0007193 | GO:1901988 | GO:0001227 |
| 2663 | GO:0007131 | GO:1901987 | GO:0001205 |
| 2664 | GO:0007093 | GO:0002063 | GO:0001191 |
| 2665 | GO:0007000 | GO:1901983 | GO:0001190 |
| 2666 | GO:0006929 | GO:1901977 | GO:0001106 |
| 2667 | GO:0006898 | GO:1901888 | GO:0001105 |
| 2668 | GO:0006821 | GO:1901881 | GO:0001104 |
| 2669 | GO:0006778 | GO:1901879 | GO:0001103 |
| 2670 | GO:0006721 | GO:1901800 | GO:0001102 |
| 2671 | GO:0006690 | GO:1901799 | GO:0001099 |
| 2672 | GO:0006516 | GO:1901796 | GO:0001085 |
| 2673 | GO:0006468 | GO:1901701 | GO:0001078 |
| 2674 | GO:0006465 | GO:1901700 | GO:0001067 |
| 2675 | GO:0006464 | GO:0002062 | GO:0001054 |
| 2676 | GO:0006406 | GO:1901699 | GO:0001047 |
| 2677 | GO:0006353 | GO:1901698 | GO:0001025 |
| 2678 | GO:0006336 | GO:1901675 | GO:0000988 |
| 2679 | GO:0006305 | GO:1901674 | GO:0000982 |
| 2680 | GO:0006278 | GO:1901663 | GO:0000980 |
| 2681 | GO:0006188 | GO:1901661 | GO:0000979 |
| 2682 | GO:0006105 | GO:1901659 | GO:0000978 |
| 2683 | GO:0006099 | GO:1901657 | GO:0000977 |
| 2684 | GO:0005834 | GO:1901652 | GO:0000976 |
| 2685 | GO:0005604 | GO:1901617 | GO:0000975 |
| 2686 | GO:0005543 | GO:0002032 | GO:0000268 |
| 2687 | GO:0004923 | GO:1901616 | GO:0000179 |
| 2688 | GO:0004591 | GO:1901615 | GO:0000049 |
| 2689 | GO:0004402 | GO:1901607 | GO:0000036 |
| 2690 | GO:0004362 | GO:1901606 | GO:0000030 |
| 2691 | GO:0004333 | GO:1901605 | GO:1990904 |
| 2692 | GO:0004096 | GO:1901576 | GO:1990777 |
| 2693 | GO:0003684 | GO:1901575 | GO:1990391 |
| 2694 | GO:0003674 | GO:1901571 | GO:1990234 |
| 2695 | GO:0003416 | GO:1901568 | GO:1902495 |
| 2696 | GO:0003071 | GO:1901566 | GO:1902493 |
| 2697 | GO:0003014 | GO:0002031 | GO:0099512 |
| 2698 | GO:0003006 | GO:1901565 | GO:0098862 |
| 2699 | GO:0002684 | GO:1901564 | GO:0098857 |

|      |                 |            |            |
|------|-----------------|------------|------------|
| 2700 | GO:0002520      | GO:1901522 | GO:0098805 |
| 2701 | GO:0002446      | GO:1901407 | GO:0098803 |
| 2702 | GO:0002092      | GO:1901379 | GO:0098802 |
| 2703 | GO:0001957      | GO:1901362 | GO:0098798 |
| 2704 | GO:0001939      | GO:1901361 | GO:0098797 |
| 2705 | GO:0001839      | GO:1901360 | GO:0098796 |
| 2706 | GO:0001819      | GO:1901343 | GO:0098794 |
| 2707 | GO:0001726      | GO:1901342 | GO:0098793 |
| 2708 | GO:0001558      | GO:0002029 | GO:0098791 |
| 2709 | GO:0001076      | GO:1901299 | GO:0098687 |
| 2710 | GO:0000988      | GO:1901293 | GO:0098590 |
| 2711 | GO:0000966      | GO:1901185 | GO:0098573 |
| 2712 | GO:0000812      | GO:1901164 | GO:0098562 |
| 2713 | GO:0000463      | GO:1901137 | GO:0098536 |
| 2714 | GO:0000428      | GO:1901136 | GO:0098533 |
| 2715 | GO:0000302      | GO:1901135 | GO:0097610 |
| 2716 | GO:0000154      | GO:1901094 | GO:0097458 |
| 2717 | GO:0000122      | GO:1901070 | GO:0097431 |
| 2718 | GO:0000086      | GO:1901068 | GO:0071260 |
| 2719 | GO:0000030      | GO:0002028 | GO:0097425 |
| 2720 | GO:0000028      | GO:1901032 | GO:0097381 |
| 2721 | ENSP00000387262 | GO:1901016 | GO:0097346 |
| 2722 | ENSP00000361965 | GO:1901006 | GO:0097208 |
| 2723 | ENSP00000357535 | GO:1901004 | GO:0097060 |
| 2724 | ENSP00000350003 | GO:1900864 | GO:0097025 |
| 2725 | ENSP00000315774 | GO:1900544 | GO:0090661 |
| 2726 | ENSP00000310668 | GO:1900542 | GO:0072686 |
| 2727 | ENSP00000302150 | GO:1900426 | GO:0072589 |
| 2728 | ENSP00000007516 | GO:1900424 | GO:0072588 |
| 2729 | hsa05160        | GO:1900373 | GO:0072562 |
| 2730 | hsa04973        | GO:0002009 | GO:0072536 |
| 2731 | hsa04630        | GO:1900372 | GO:0072372 |
| 2732 | hsa04540        | GO:1900371 | GO:0071944 |
| 2733 | hsa04270        | GO:1900274 | GO:0071682 |
| 2734 | hsa00983        | GO:1900135 | GO:0071564 |
| 2735 | hsa00250        | GO:1900133 | GO:0071556 |
| 2736 | hsa00120        | GO:1900122 | GO:0071339 |
| 2737 | GO:2000644      | GO:1900120 | GO:0071062 |
| 2738 | GO:2000146      | GO:1900116 | GO:0070993 |
| 2739 | GO:1904591      | GO:1900115 | GO:0070761 |
| 2740 | GO:1904036      | GO:1900086 | GO:0070469 |
| 2741 | GO:1903750      | GO:0002002 | GO:0070461 |
| 2742 | GO:1903522      | GO:1900084 | GO:0070382 |
| 2743 | GO:1903409      | GO:1900048 | GO:0070195 |
| 2744 | GO:1903047      | GO:1900047 | GO:0070161 |
| 2745 | GO:1902946      | GO:1900046 | GO:0070160 |
| 2746 | GO:1902850      | GO:1900034 | GO:0008219 |
| 2747 | GO:1902100      | GO:1900024 | GO:0070110 |
| 2748 | GO:1901983      | GO:1900004 | GO:0070069 |
| 2749 | GO:1901564      | GO:1900003 | GO:0061695 |
| 2750 | GO:1901363      | GO:0099565 | GO:0060205 |
| 2751 | GO:1901185      | GO:0099537 | GO:0060076 |
| 2752 | GO:1901164      | GO:0001999 | GO:0055037 |

|      |            |            |            |
|------|------------|------------|------------|
| 2753 | GO:1900274 | GO:0099536 | GO:0055029 |
| 2754 | GO:0098869 | GO:0099531 | GO:0051233 |
| 2755 | GO:0098868 | GO:0098900 | GO:0048471 |
| 2756 | GO:0098662 | GO:0098869 | GO:0048188 |
| 2757 | GO:0098661 | GO:0098868 | GO:0046658 |
| 2758 | GO:0098657 | GO:0098813 | GO:0045335 |
| 2759 | GO:0098533 | GO:0098801 | GO:0045334 |
| 2760 | GO:0097381 | GO:0098781 | GO:0045283 |
| 2761 | GO:0090646 | GO:0098771 | GO:0045281 |
| 2762 | GO:0090504 | GO:0098761 | GO:0045273 |
| 2763 | GO:0090501 | GO:0001991 | GO:0045271 |
| 2764 | GO:0090329 | GO:0098760 | GO:0045267 |
| 2765 | GO:0090175 | GO:0098756 | GO:0045120 |
| 2766 | GO:0090092 | GO:0098754 | GO:0044464 |
| 2767 | GO:0086091 | GO:0098743 | GO:0044463 |
| 2768 | GO:0086064 | GO:0098742 | GO:0044455 |
| 2769 | GO:0072562 | GO:0098739 | GO:0044448 |
| 2770 | GO:0072431 | GO:0098732 | GO:0016265 |
| 2771 | GO:0072358 | GO:0098727 | GO:0044446 |
| 2772 | GO:0072338 | GO:0098662 | GO:0044440 |
| 2773 | GO:0072216 | GO:0098661 | GO:0044432 |
| 2774 | GO:0071936 | GO:0001990 | GO:0044427 |
| 2775 | GO:0071897 | GO:0098660 | GO:0044425 |
| 2776 | GO:0071826 | GO:0098657 | GO:0044424 |
| 2777 | GO:0071705 | GO:0098656 | GO:0044422 |
| 2778 | GO:0071702 | GO:0098655 | GO:0044420 |
| 2779 | GO:0070887 | GO:0098609 | GO:0044309 |
| 2780 | GO:0070723 | GO:0098602 | GO:0044306 |
| 2781 | GO:0070663 | GO:0098542 | GO:0043679 |
| 2782 | GO:0070647 | GO:0098534 | GO:0043601 |
| 2783 | GO:0070195 | GO:0097696 | GO:0043296 |
| 2784 | GO:0070085 | GO:0097659 | GO:0043235 |
| 2785 | GO:0070034 | GO:0001975 | GO:0043229 |
| 2786 | GO:0061198 | GO:0097581 | GO:0043226 |
| 2787 | GO:0061140 | GO:0097553 | GO:0043209 |
| 2788 | GO:0061098 | GO:0097531 | GO:0043202 |
| 2789 | GO:0061045 | GO:0097530 | GO:0043198 |
| 2790 | GO:0060765 | GO:0097529 | GO:0043189 |
| 2791 | GO:0060670 | GO:0097502 | GO:0043025 |
| 2792 | GO:0060429 | GO:0097485 | GO:0042995 |
| 2793 | GO:0060402 | GO:0097480 | GO:0042827 |
| 2794 | GO:0060216 | GO:0097435 | GO:0042645 |
| 2795 | GO:0060071 | GO:0097306 | GO:0042641 |
| 2796 | GO:0055082 | GO:0001974 | GO:0042599 |
| 2797 | GO:0055080 | GO:0097305 | GO:0042579 |
| 2798 | GO:0052200 | GO:0097212 | GO:0042567 |
| 2799 | GO:0051983 | GO:0097190 | GO:0042564 |
| 2800 | GO:0051960 | GO:0097178 | GO:0036477 |
| 2801 | GO:0051930 | GO:0097164 | GO:0036464 |
| 2802 | GO:0051781 | GO:0097094 | GO:0036454 |
| 2803 | GO:0051640 | GO:0097034 | GO:0036019 |
| 2804 | GO:0051604 | GO:0097031 | GO:0035770 |
| 2805 | GO:0051570 | GO:0090672 | GO:0035098 |

|      |            |            |            |
|------|------------|------------|------------|
| 2806 | GO:0051495 | GO:0090671 | GO:0034774 |
| 2807 | GO:0051481 | GO:0001963 | GO:0034703 |
| 2808 | GO:0051438 | GO:0090670 | GO:0034702 |
| 2809 | GO:0051431 | GO:0090659 | GO:0034457 |
| 2810 | GO:0051352 | GO:0090646 | GO:0034456 |
| 2811 | GO:0051349 | GO:0090557 | GO:0034455 |
| 2812 | GO:0051346 | GO:0090505 | GO:0034399 |
| 2813 | GO:0051235 | GO:0090504 | GO:0034364 |
| 2814 | GO:0051222 | GO:0090503 | GO:0034358 |
| 2815 | GO:0051216 | GO:0090502 | GO:0033276 |
| 2816 | GO:0051208 | GO:0090501 | GO:0033267 |
| 2817 | GO:0051174 | GO:0090407 | GO:0033202 |
| 2818 | GO:0051091 | GO:0001959 | GO:0033186 |
| 2819 | GO:0051048 | GO:0090387 | GO:0033178 |
| 2820 | GO:0051046 | GO:0090386 | GO:0033116 |
| 2821 | GO:0050926 | GO:0090329 | GO:0032993 |
| 2822 | GO:0050920 | GO:0090316 | GO:0032806 |
| 2823 | GO:0050877 | GO:0090307 | GO:0032592 |
| 2824 | GO:0050817 | GO:0090305 | GO:0032545 |
| 2825 | GO:0050810 | GO:0090304 | GO:0032421 |
| 2826 | GO:0050790 | GO:0090303 | GO:0032154 |
| 2827 | GO:0050728 | GO:0090288 | GO:0032040 |
| 2828 | GO:0050715 | GO:0090287 | GO:0031988 |
| 2829 | GO:0050671 | GO:0001958 | GO:0031983 |
| 2830 | GO:0048742 | GO:0090280 | GO:0031970 |
| 2831 | GO:0048639 | GO:0090279 | GO:0031967 |
| 2832 | GO:0048583 | GO:0090276 | GO:0031966 |
| 2833 | GO:0048511 | GO:0090261 | GO:0031965 |
| 2834 | GO:0048285 | GO:0090257 | GO:0031904 |
| 2835 | GO:0048247 | GO:0090197 | GO:0031901 |
| 2836 | GO:0048167 | GO:0090196 | GO:0031588 |
| 2837 | GO:0046950 | GO:0090195 | GO:0031526 |
| 2838 | GO:0046850 | GO:0090185 | GO:0031519 |
| 2839 | GO:0046849 | GO:0090184 | GO:0031515 |
| 2840 | GO:0046700 | GO:0001957 | GO:0031461 |
| 2841 | GO:0046487 | GO:0090179 | GO:0031306 |
| 2842 | GO:0046128 | GO:0090178 | GO:0031301 |
| 2843 | GO:0046058 | GO:0090177 | GO:0031300 |
| 2844 | GO:0045992 | GO:0090175 | GO:0031256 |
| 2845 | GO:0045935 | GO:0090166 | GO:0031252 |
| 2846 | GO:0045927 | GO:0090151 | GO:0031248 |
| 2847 | GO:0045861 | GO:0090150 | GO:0031232 |
| 2848 | GO:0045840 | GO:0090132 | GO:1901698 |
| 2849 | GO:0045807 | GO:0090130 | GO:0031231 |
| 2850 | GO:0045777 | GO:0090109 | GO:0031228 |
| 2851 | GO:0045664 | GO:0001944 | GO:0031227 |
| 2852 | GO:0045661 | GO:0090101 | GO:0031226 |
| 2853 | GO:0045596 | GO:0090100 | GO:0031225 |
| 2854 | GO:0045595 | GO:0090092 | GO:0031012 |
| 2855 | GO:0045259 | GO:0090087 | GO:0031010 |
| 2856 | GO:0045155 | GO:0090080 | GO:0030964 |
| 2857 | GO:0044853 | GO:0090075 | GO:0030934 |
| 2858 | GO:0044849 | GO:0090068 | GO:0030914 |

|      |            |            |            |
|------|------------|------------|------------|
| 2859 | GO:0044843 | GO:0090066 | GO:0030894 |
| 2860 | GO:0044773 | GO:0090042 | GO:0030880 |
| 2861 | GO:0044765 | GO:0090035 | GO:0030863 |
| 2862 | GO:0044711 | GO:0001938 | GO:0030849 |
| 2863 | GO:0044707 | GO:0090034 | GO:0030692 |
| 2864 | GO:0044459 | GO:0090025 | GO:0030689 |
| 2865 | GO:0044283 | GO:0090022 | GO:0030687 |
| 2866 | GO:0044281 | GO:0090004 | GO:0030684 |
| 2867 | GO:0044265 | GO:0090003 | GO:0030669 |
| 2868 | GO:0044257 | GO:0090002 | GO:0030667 |
| 2869 | GO:0044236 | GO:0086091 | GO:0030666 |
| 2870 | GO:0043900 | GO:0086065 | GO:0030662 |
| 2871 | GO:0043648 | GO:0086064 | GO:0030496 |
| 2872 | GO:0043587 | GO:0086036 | GO:0030176 |
| 2873 | GO:0043566 | GO:0001937 | GO:0030173 |
| 2874 | GO:0043426 | GO:0086012 | GO:0030140 |
| 2875 | GO:0043087 | GO:0086003 | GO:0030136 |
| 2876 | GO:0043068 | GO:0086001 | GO:0009628 |
| 2877 | GO:0042976 | GO:0080171 | GO:0030133 |
| 2878 | GO:0042770 | GO:0080135 | GO:0030027 |
| 2879 | GO:0042592 | GO:0080134 | GO:0022627 |
| 2880 | GO:0042129 | GO:0080090 | GO:0022626 |
| 2881 | GO:0042113 | GO:0075733 | GO:0022625 |
| 2882 | GO:0040013 | GO:0075136 | GO:0019908 |
| 2883 | GO:0036481 | GO:0072678 | GO:0019898 |
| 2884 | GO:0036442 | GO:0001936 | GO:0019866 |
| 2885 | GO:0035927 | GO:0072677 | GO:0017053 |
| 2886 | GO:0035861 | GO:0072676 | GO:0016942 |
| 2887 | GO:0035587 | GO:0072659 | GO:0016605 |
| 2888 | GO:0035337 | GO:0072657 | GO:0016589 |
| 2889 | GO:0035035 | GO:0072655 | GO:0016581 |
| 2890 | GO:0034442 | GO:0072599 | GO:0016514 |
| 2891 | GO:0034364 | GO:0072594 | GO:0016323 |
| 2892 | GO:0033627 | GO:0072593 | GO:0016281 |
| 2893 | GO:0033619 | GO:0072583 | GO:0016020 |
| 2894 | GO:0033280 | GO:0072577 | GO:0015935 |
| 2895 | GO:0033043 | GO:0001935 | GO:0015030 |
| 2896 | GO:0032963 | GO:0072524 | GO:0014704 |
| 2897 | GO:0032845 | GO:0072522 | GO:0012505 |
| 2898 | GO:0032640 | GO:0072521 | GO:0009986 |
| 2899 | GO:0032637 | GO:0072511 | GO:0009925 |
| 2900 | GO:0032553 | GO:0072507 | GO:0009898 |
| 2901 | GO:0032535 | GO:0072503 | GO:0009295 |
| 2902 | GO:0032355 | GO:0072431 | GO:0008328 |
| 2903 | GO:0032147 | GO:0072422 | GO:0008024 |
| 2904 | GO:0032103 | GO:0072413 | GO:0005947 |
| 2905 | GO:0031983 | GO:0072401 | GO:0005938 |
| 2906 | GO:0031701 | GO:0001934 | GO:0005929 |
| 2907 | GO:0031492 | GO:0072395 | GO:0005924 |
| 2908 | GO:0031281 | GO:0072384 | GO:0005923 |
| 2909 | GO:0031280 | GO:0072378 | GO:0005902 |
| 2910 | GO:0031232 | GO:0072376 | GO:0005901 |
| 2911 | GO:0031055 | GO:0072359 | GO:0005900 |

|      |            |            |            |
|------|------------|------------|------------|
| 2912 | GO:0031011 | GO:0072358 | GO:0005896 |
| 2913 | GO:0030947 | GO:0072350 | GO:0005879 |
| 2914 | GO:0030686 | GO:0072344 | GO:0005856 |
| 2915 | GO:0030593 | GO:0072338 | GO:0005852 |
| 2916 | GO:0030515 | GO:0072331 | GO:0005829 |
| 2917 | GO:0030332 | GO:0001933 | GO:0005815 |
| 2918 | GO:0030323 | GO:0072330 | GO:0005814 |
| 2919 | GO:0030315 | GO:0072329 | GO:0005802 |
| 2920 | GO:0030170 | GO:0072321 | GO:0005797 |
| 2921 | GO:0030135 | GO:0072216 | GO:0005796 |
| 2922 | GO:0030099 | GO:0072006 | GO:0005795 |
| 2923 | GO:0023057 | GO:0071929 | GO:0005794 |
| 2924 | GO:0022857 | GO:0071922 | GO:0005791 |
| 2925 | GO:0022838 | GO:0071921 | GO:0005788 |
| 2926 | GO:0019438 | GO:0071902 | GO:0005783 |
| 2927 | GO:0019221 | GO:0071900 | GO:0005779 |
| 2928 | GO:0019220 | GO:0001932 | GO:0005778 |
| 2929 | GO:0018279 | GO:0071897 | GO:0005777 |
| 2930 | GO:0018076 | GO:0071880 | GO:0005776 |
| 2931 | GO:0017136 | GO:0071875 | GO:0005770 |
| 2932 | GO:0016884 | GO:0071867 | GO:0005768 |
| 2933 | GO:0016830 | GO:0071840 | GO:0005764 |
| 2934 | GO:0016608 | GO:0071826 | GO:0005762 |
| 2935 | GO:0016580 | GO:0071824 | GO:0005761 |
| 2936 | GO:0016568 | GO:0071822 | GO:0005759 |
| 2937 | GO:0016485 | GO:0071806 | GO:0005754 |
| 2938 | GO:0016337 | GO:0071805 | GO:0005753 |
| 2939 | GO:0016300 | hsa00562   | GO:0005751 |
| 2940 | GO:0016192 | GO:0001911 | GO:0005750 |
| 2941 | GO:0016101 | GO:0071804 | GO:0005746 |
| 2942 | GO:0016073 | GO:0071803 | GO:0005744 |
| 2943 | GO:0016048 | GO:0071773 | GO:0005743 |
| 2944 | GO:0015935 | GO:0071772 | GO:0005737 |
| 2945 | GO:0015837 | GO:0071706 | GO:0005730 |
| 2946 | GO:0015276 | GO:0071705 | GO:0005720 |
| 2947 | GO:0015267 | GO:0071704 | GO:0005719 |
| 2948 | GO:0010965 | GO:0071702 | GO:0005697 |
| 2949 | GO:0010948 | GO:0071695 | GO:0005694 |
| 2950 | GO:0010711 | GO:0071692 | GO:0005677 |
| 2951 | GO:0010633 | GO:0001909 | GO:0005675 |
| 2952 | GO:0010628 | GO:0071675 | GO:0005672 |
| 2953 | GO:0010557 | GO:0071674 | GO:0005671 |
| 2954 | GO:0010522 | GO:0071635 | GO:0005667 |
| 2955 | GO:0010466 | GO:0071634 | GO:0005666 |
| 2956 | GO:0009888 | GO:0071622 | GO:0005664 |
| 2957 | GO:0009452 | GO:0071621 | GO:0005662 |
| 2958 | GO:0009396 | GO:0071616 | GO:0005657 |
| 2959 | GO:0009144 | GO:0071604 | GO:0005635 |
| 2960 | GO:0008361 | GO:0071593 | GO:0005623 |
| 2961 | GO:0008285 | GO:0071560 | GO:0005614 |
| 2962 | GO:0008121 | GO:0001906 | GO:0005604 |
| 2963 | GO:0008080 | GO:0071559 | GO:0005596 |
| 2964 | GO:0008026 | GO:0071549 | GO:0005578 |



|      |            |            |            |
|------|------------|------------|------------|
| 2965 | GO:0007346 | GO:0071548 | GO:0005577 |
| 2966 | GO:0007169 | GO:0071502 | GO:0005575 |
| 2967 | GO:0007167 | GO:0071495 | GO:0001940 |
| 2968 | GO:0007159 | GO:0071478 | GO:0001939 |
| 2969 | GO:0007091 | GO:0071466 | GO:0001917 |
| 2970 | GO:0006940 | GO:0071459 | GO:0001772 |
| 2971 | GO:0006937 | GO:0071442 | GO:0001750 |
| 2972 | GO:0006928 | GO:0071440 | GO:0001652 |
| 2973 | GO:0006887 | GO:0001894 | GO:0001650 |
| 2974 | GO:0006873 | GO:0071436 | GO:0000940 |
| 2975 | GO:0006810 | GO:0071431 | GO:0000939 |
| 2976 | GO:0006781 | GO:0071428 | GO:0000932 |
| 2977 | GO:0006743 | GO:0071427 | GO:0000922 |
| 2978 | GO:0006725 | GO:0071426 | GO:0000808 |
| 2979 | GO:0006513 | GO:0071417 | GO:0000806 |
| 2980 | GO:0006337 | GO:0071392 | GO:0000805 |
| 2981 | GO:0006334 | GO:0071391 | GO:0000793 |
| 2982 | GO:0006290 | GO:0071385 | GO:0000792 |
| 2983 | GO:0006177 | GO:0071384 | GO:0000790 |
| 2984 | GO:0006103 | GO:0001893 | GO:0000788 |
| 2985 | GO:0006084 | GO:0071383 | GO:0000785 |
| 2986 | GO:0005751 | GO:0071378 | GO:0000784 |
| 2987 | GO:0005736 | GO:0071377 | GO:0000777 |
| 2988 | GO:0005261 | GO:0071363 | GO:0000776 |
| 2989 | GO:0004407 | GO:0071354 | GO:0000428 |
| 2990 | GO:0004004 | GO:0071345 | GO:0000315 |
| 2991 | GO:0003044 | GO:0071322 | GO:0000228 |
| 2992 | GO:0002764 | GO:0071320 | GO:0000178 |
| 2993 | GO:0002699 | GO:0071310 | GO:0000177 |
| 2994 | GO:0002698 | GO:0071260 | GO:0000176 |
| 2995 | GO:0002694 | GO:0001890 | GO:0000152 |
| 2996 | GO:0002682 | GO:0071174 | GO:0000139 |
| 2997 | GO:0002576 | GO:0071173 | GO:0000125 |
| 2998 | GO:0002367 | GO:0071168 | GO:0000123 |
| 2999 | GO:0002253 | GO:0071166 | GO:0000118 |
| 3000 | GO:0002002 | GO:0071158 | GO:2001257 |
| 3001 | GO:0001938 | GO:0071157 | GO:2001251 |
| 3002 | GO:0001885 | GO:0071156 | GO:2001237 |
| 3003 | GO:0001837 | GO:0071104 | GO:2001236 |
| 3004 | GO:0001822 | GO:0071103 | GO:2001202 |
| 3005 | GO:0001818 | GO:0071051 | GO:2001201 |
| 3006 | GO:0001817 | GO:0001889 | GO:2001027 |
| 3007 | GO:0001772 | GO:0071049 | GO:2001022 |
| 3008 | GO:0001763 | GO:0071047 | GO:2001020 |
| 3009 | GO:0001696 | GO:0071046 | GO:2000870 |
| 3010 | GO:0001654 | GO:0071043 | GO:2000833 |
| 3011 | GO:0001561 | GO:0071038 | GO:2000757 |
| 3012 | GO:0001542 | GO:0071035 | GO:2000736 |
| 3013 | GO:0001158 | GO:0071034 | GO:2000644 |
| 3014 | GO:0001103 | GO:0071033 | GO:2000617 |
| 3015 | GO:0001071 | GO:0071031 | GO:2000615 |
| 3016 | GO:0000978 | GO:0071029 | GO:2000546 |
| 3017 | GO:0000781 | GO:0001887 | GO:2000544 |

|      |                 |            |            |
|------|-----------------|------------|------------|
| 3018 | GO:0000726      | GO:0071028 | GO:2000403 |
| 3019 | GO:0000466      | GO:0071027 | GO:2000377 |
| 3020 | GO:0000459      | GO:0071025 | GO:2000352 |
| 3021 | GO:0000307      | GO:0070987 | GO:2000351 |
| 3022 | GO:0000278      | GO:0070977 | GO:2000296 |
| 3023 | GO:0000184      | GO:0070972 | GO:2000181 |
| 3024 | ENSP00000369647 | GO:0070933 | GO:2000147 |
| 3025 | ENSP00000352021 | GO:0070932 | GO:2000145 |
| 3026 | ENSP00000346839 | GO:0070925 | GO:2000134 |
| 3027 | ENSP00000333934 | GO:0070911 | GO:2000113 |
| 3028 | ENSP00000328671 | GO:0001885 | GO:2000098 |
| 3029 | ENSP00000295453 | GO:0070901 | GO:2000097 |
| 3030 | ENSP00000295400 | GO:0070900 | GO:2000026 |
| 3031 | ENSP00000283109 | GO:0070897 | GO:2000021 |
| 3032 | ENSP00000263341 | GO:0070887 | GO:2000002 |
| 3033 | ENSP00000263331 | GO:0070848 | GO:2000001 |
| 3034 | ENSP00000258743 | GO:0070846 | GO:1990778 |
| 3035 | ENSP00000258424 | GO:0070844 | GO:1990481 |
| 3036 | hsa05202        | GO:0070838 | GO:1990402 |
| 3037 | hsa04971        | GO:0070830 | GO:1990266 |
| 3038 | hsa04932        | GO:0070816 | GO:1904894 |
| 3039 | hsa04666        | GO:0001878 | GO:1904874 |
| 3040 | hsa04640        | GO:0070741 | GO:1904851 |
| 3041 | hsa04610        | GO:0070734 | GO:1904849 |
| 3042 | hsa04110        | GO:0070727 | GO:1904847 |
| 3043 | hsa04060        | GO:0070723 | GO:1904816 |
| 3044 | hsa04015        | GO:0070670 | GO:1904814 |
| 3045 | hsa00970        | GO:0070665 | GO:1904667 |
| 3046 | hsa00650        | GO:0070663 | GO:1904666 |
| 3047 | GO:2000401      | GO:0070661 | GO:1904591 |
| 3048 | GO:2000352      | GO:0070647 | GO:1904377 |
| 3049 | GO:2000027      | GO:0070633 | GO:1904375 |
| 3050 | GO:2000026      | GO:0001869 | GO:1904237 |
| 3051 | GO:1990837      | GO:0070613 | GO:1904235 |
| 3052 | GO:1990778      | GO:0070588 | GO:1904064 |
| 3053 | GO:1990402      | GO:0070585 | GO:1904029 |
| 3054 | GO:1904849      | GO:0070528 | GO:1903911 |
| 3055 | GO:1904062      | GO:0070525 | GO:1903909 |
| 3056 | GO:1903911      | GO:0070509 | GO:1903902 |
| 3057 | GO:1903426      | GO:0070507 | GO:1903845 |
| 3058 | GO:1902806      | GO:0070489 | GO:1903844 |
| 3059 | GO:1902774      | GO:0070486 | GO:1903793 |
| 3060 | GO:1902582      | GO:0070374 | GO:1903753 |
| 3061 | GO:1902580      | GO:0001845 | GO:1903751 |
| 3062 | GO:1902106      | GO:0070372 | GO:1903750 |
| 3063 | GO:1901988      | GO:0070371 | GO:1903725 |
| 3064 | GO:1901293      | GO:0070278 | GO:1903706 |
| 3065 | GO:1900122      | GO:0070272 | GO:1903530 |
| 3066 | GO:0098803      | GO:0070271 | GO:1903523 |
| 3067 | GO:0098727      | GO:0070266 | GO:1903513 |
| 3068 | GO:0097306      | GO:0070230 | GO:1903510 |
| 3069 | GO:0097094      | GO:0070229 | GO:1903509 |
| 3070 | GO:0090279      | GO:0070228 | GO:1903426 |

|      |            |            |            |
|------|------------|------------|------------|
| 3071 | GO:0090257 | GO:0070227 | GO:1903409 |
| 3072 | GO:0090196 | GO:0001840 | GO:1903337 |
| 3073 | GO:0090177 | GO:0070201 | GO:1903335 |
| 3074 | GO:0080134 | GO:0070198 | GO:1903322 |
| 3075 | GO:0080090 | GO:0070169 | GO:1903320 |
| 3076 | GO:0072678 | GO:0070168 | GO:1903318 |
| 3077 | GO:0072524 | GO:0070167 | GO:1903317 |
| 3078 | GO:0072511 | GO:0070142 | GO:0032386 |
| 3079 | GO:0072395 | GO:0070129 | GO:1903313 |
| 3080 | GO:0071929 | GO:0070126 | GO:1903310 |
| 3081 | GO:0071880 | GO:0070125 | GO:1903308 |
| 3082 | GO:0071824 | GO:0070124 | GO:1903169 |
| 3083 | GO:0071803 | GO:0001839 | GO:1903078 |
| 3084 | GO:0071674 | GO:0070120 | GO:1903076 |
| 3085 | GO:0071310 | GO:0070102 | GO:1903055 |
| 3086 | GO:0071166 | GO:0070098 | GO:1903051 |
| 3087 | GO:0071156 | GO:0070085 | GO:1903047 |
| 3088 | GO:0070900 | GO:0070076 | GO:1903039 |
| 3089 | GO:0070665 | GO:0070071 | GO:1903037 |
| 3090 | GO:0070577 | GO:0065009 | GO:1903035 |
| 3091 | GO:0070330 | GO:0065008 | GO:1903034 |
| 3092 | GO:0070278 | GO:0065007 | GO:1903019 |
| 3093 | GO:0070061 | GO:0065005 | GO:1903008 |
| 3094 | GO:0061572 | GO:0001837 | GO:1902998 |
| 3095 | GO:0061035 | GO:0065004 | GO:1902996 |
| 3096 | GO:0060713 | GO:0065003 | GO:1902993 |
| 3097 | GO:0060401 | GO:0065002 | GO:1902953 |
| 3098 | GO:0060076 | GO:0061732 | GO:1902949 |
| 3099 | GO:0055074 | GO:0061726 | GO:1902947 |
| 3100 | GO:0052312 | GO:0061718 | GO:1902679 |
| 3101 | GO:0051961 | GO:0061647 | GO:1902656 |
| 3102 | GO:0051917 | GO:0061641 | GO:1902624 |
| 3103 | GO:0051896 | GO:0061640 | GO:1902622 |
| 3104 | GO:0051784 | GO:0061621 | GO:1902593 |
| 3105 | GO:0051704 | GO:0001833 | GO:1902580 |
| 3106 | GO:0051573 | GO:0061620 | GO:1902572 |
| 3107 | GO:0051351 | GO:0061615 | GO:1902571 |
| 3108 | GO:0051336 | GO:0061572 | GO:1902533 |
| 3109 | GO:0051272 | GO:0061564 | GO:1902476 |
| 3110 | GO:0051252 | GO:0061518 | GO:1902430 |
| 3111 | GO:0051187 | GO:0061517 | GO:1902403 |
| 3112 | GO:0051169 | GO:0061462 | GO:1902400 |
| 3113 | GO:0051128 | GO:0061458 | GO:1902305 |
| 3114 | GO:0051098 | GO:0061448 | GO:1902275 |
| 3115 | GO:0050909 | GO:0061430 | GO:1902105 |
| 3116 | GO:0050880 | GO:0001825 | GO:1902100 |
| 3117 | GO:0050870 | GO:0061418 | GO:1902099 |
| 3118 | GO:0050866 | GO:0061337 | GO:1902042 |
| 3119 | GO:0050857 | GO:0061302 | GO:1902004 |
| 3120 | GO:0050820 | GO:0061198 | GO:1901998 |
| 3121 | GO:0050778 | GO:0061197 | GO:1901992 |
| 3122 | GO:0050767 | GO:0061196 | GO:1901987 |
| 3123 | GO:0050731 | GO:0061140 | GO:1901983 |

|      |            |            |            |
|------|------------|------------|------------|
| 3124 | GO:0050708 | GO:0061138 | GO:1901888 |
| 3125 | GO:0050686 | GO:0061136 | GO:1901881 |
| 3126 | GO:0050679 | GO:0061098 | GO:1901879 |
| 3127 | GO:0048856 | GO:0001824 | GO:1901800 |
| 3128 | GO:0048732 | GO:0061097 | GO:1901796 |
| 3129 | GO:0048553 | GO:0061078 | GO:1901675 |
| 3130 | GO:0048518 | GO:0061077 | GO:1901674 |
| 3131 | GO:0048468 | GO:0061061 | GO:1901663 |
| 3132 | GO:0048254 | GO:0061045 | GO:1901661 |
| 3133 | GO:0048245 | GO:0061044 | GO:1901659 |
| 3134 | GO:0048188 | GO:0061041 | GO:1901652 |
| 3135 | GO:0048144 | GO:0061035 | GO:0043066 |
| 3136 | GO:0046942 | GO:0061034 | GO:1901616 |
| 3137 | GO:0046939 | GO:0061029 | GO:1901615 |
| 3138 | GO:0046888 | GO:0001822 | GO:1901605 |
| 3139 | GO:0046653 | GO:0061028 | GO:1901522 |
| 3140 | GO:0046545 | GO:0061024 | GO:1901379 |
| 3141 | GO:0046365 | GO:0061008 | GO:1901343 |
| 3142 | GO:0046040 | GO:0060986 | GO:1901185 |
| 3143 | GO:0045943 | GO:0060968 | GO:1901164 |
| 3144 | GO:0045930 | GO:0060765 | GO:1901137 |
| 3145 | GO:0045841 | GO:0060713 | GO:1901136 |
| 3146 | GO:0045762 | GO:0060712 | GO:1901135 |
| 3147 | GO:0045761 | GO:0060670 | GO:1901094 |
| 3148 | GO:0045669 | GO:0060669 | GO:1901068 |
| 3149 | GO:0045666 | GO:0001819 | GO:1901016 |
| 3150 | GO:0045580 | GO:0060665 | GO:1901006 |
| 3151 | GO:0045445 | GO:0060664 | GO:1900864 |
| 3152 | GO:0045254 | GO:0060627 | GO:1900544 |
| 3153 | GO:0045252 | GO:0060591 | GO:1900542 |
| 3154 | GO:0045188 | GO:0060548 | GO:1900426 |
| 3155 | GO:0045087 | GO:0060491 | GO:1900424 |
| 3156 | GO:0044818 | GO:0060463 | GO:1900373 |
| 3157 | GO:0044786 | GO:0060462 | GO:1900372 |
| 3158 | GO:0044772 | GO:0060456 | GO:1900371 |
| 3159 | GO:0044764 | GO:0060429 | GO:1900274 |
| 3160 | GO:0044454 | GO:0001818 | GO:1900135 |
| 3161 | GO:0044060 | GO:0060416 | GO:1900133 |
| 3162 | GO:0043997 | GO:0060402 | GO:1900122 |
| 3163 | GO:0043983 | GO:0060401 | GO:1900120 |
| 3164 | GO:0043968 | GO:0060396 | GO:1900116 |
| 3165 | GO:0043604 | GO:0060351 | GO:1900034 |
| 3166 | GO:0043408 | GO:0060350 | GO:0099531 |
| 3167 | GO:0043405 | GO:0060349 | GO:0098900 |
| 3168 | GO:0043271 | GO:0060348 | GO:0098801 |
| 3169 | GO:0043066 | GO:0060346 | GO:0098771 |
| 3170 | GO:0043065 | GO:0060341 | GO:0098761 |
| 3171 | GO:0042573 | GO:0001817 | GO:0098756 |
| 3172 | GO:0042516 | GO:0060326 | GO:0098743 |
| 3173 | GO:0042451 | GO:0060325 | GO:0098742 |
| 3174 | GO:0042359 | GO:0060323 | GO:0098739 |
| 3175 | GO:0042327 | GO:0060322 | GO:0098732 |
| 3176 | GO:0042307 | GO:0060312 | GO:0098727 |

|      |            |            |            |
|------|------------|------------|------------|
| 3177 | GO:0042306 | GO:0060311 | GO:0098662 |
| 3178 | GO:0042110 | GO:0060310 | GO:0098661 |
| 3179 | GO:0042033 | GO:0060309 | GO:0098657 |
| 3180 | GO:0040007 | GO:0060292 | GO:0098656 |
| 3181 | GO:0039519 | GO:0060284 | GO:0098542 |
| 3182 | GO:0038021 | GO:0001816 | GO:0006793 |
| 3183 | GO:0036477 | GO:0060271 | GO:0098534 |
| 3184 | GO:0036265 | GO:0060261 | GO:0097581 |
| 3185 | GO:0036065 | GO:0060260 | GO:0097553 |
| 3186 | GO:0035812 | GO:0060255 | GO:0097531 |
| 3187 | GO:0035384 | GO:0060218 | GO:0097480 |
| 3188 | GO:0035295 | GO:0060216 | GO:0097435 |
| 3189 | GO:0035025 | GO:0060193 | GO:0097306 |
| 3190 | GO:0034766 | GO:0060191 | GO:0097305 |
| 3191 | GO:0034511 | GO:0060158 | GO:0097212 |
| 3192 | GO:0034508 | GO:0060135 | GO:0097178 |
| 3193 | GO:0034332 | GO:0001775 | GO:0097164 |
| 3194 | GO:0034109 | GO:0060083 | GO:0097094 |
| 3195 | GO:0033160 | GO:0060073 | GO:0097034 |
| 3196 | GO:0032990 | GO:0060071 | GO:0090672 |
| 3197 | GO:0032964 | GO:0060070 | GO:0090671 |
| 3198 | GO:0032945 | GO:0060047 | GO:0090670 |
| 3199 | GO:0032786 | GO:0060029 | GO:0090659 |
| 3200 | GO:0032774 | GO:0060027 | GO:0090557 |
| 3201 | GO:0032675 | GO:0060021 | GO:0090505 |
| 3202 | GO:0032612 | GO:0055119 | GO:0090504 |
| 3203 | GO:0032606 | GO:0055114 | GO:0090503 |
| 3204 | GO:0032559 | GO:0001763 | GO:0090502 |
| 3205 | GO:0032502 | GO:0055108 | GO:0090407 |
| 3206 | GO:0032413 | GO:0055086 | GO:0090387 |
| 3207 | GO:0032269 | GO:0055085 | GO:0090386 |
| 3208 | GO:0032102 | GO:0055082 | GO:0090316 |
| 3209 | GO:0031639 | GO:0055080 | GO:0090307 |
| 3210 | GO:0031589 | GO:0055078 | GO:0090303 |
| 3211 | GO:0031326 | GO:0055075 | GO:0090280 |
| 3212 | GO:0031324 | GO:0055074 | GO:0090276 |
| 3213 | GO:0031323 | GO:0055067 | GO:0090197 |
| 3214 | GO:0031093 | GO:0055065 | GO:0090196 |
| 3215 | GO:0031061 | GO:0001738 | GO:0090195 |
| 3216 | GO:0030968 | GO:0052652 | GO:0090185 |
| 3217 | GO:0030809 | GO:0052548 | GO:0090179 |
| 3218 | GO:0030803 | GO:0052547 | GO:0090178 |
| 3219 | GO:0030801 | GO:0052472 | GO:0090177 |
| 3220 | GO:0030688 | GO:0052312 | GO:0090166 |
| 3221 | GO:0030513 | GO:0052200 | GO:0042802 |
| 3222 | GO:0030510 | GO:0052192 | GO:0090151 |
| 3223 | GO:0030509 | GO:0052126 | GO:0090150 |
| 3224 | GO:0030501 | GO:0051985 | GO:0090132 |
| 3225 | GO:0030449 | GO:0051984 | GO:0090109 |
| 3226 | GO:0030335 | GO:0001731 | GO:0090101 |
| 3227 | GO:0030330 | GO:0051983 | GO:0090080 |
| 3228 | GO:0030212 | GO:0051969 | GO:0090066 |
| 3229 | GO:0030194 | GO:0051966 | GO:0090042 |

|      |            |            |            |
|------|------------|------------|------------|
| 3230 | GO:0030162 | GO:0051962 | GO:0090035 |
| 3231 | GO:0030154 | GO:0051961 | GO:0090034 |
| 3232 | GO:0030055 | GO:0051960 | GO:0090025 |
| 3233 | GO:0030030 | GO:0051954 | GO:0090022 |
| 3234 | GO:0022890 | GO:0051952 | GO:0090004 |
| 3235 | GO:0019955 | GO:0051937 | GO:0090003 |
| 3236 | GO:0019538 | GO:0051932 | GO:0086091 |
| 3237 | GO:0019369 | GO:0001706 | GO:0086065 |
| 3238 | GO:0019219 | GO:0051931 | GO:0075733 |
| 3239 | GO:0019218 | GO:0051930 | GO:0072655 |
| 3240 | GO:0018130 | GO:0051928 | GO:0072599 |
| 3241 | GO:0018108 | GO:0051924 | GO:0072593 |
| 3242 | GO:0017158 | GO:0051918 | GO:0072583 |
| 3243 | GO:0017157 | GO:0051917 | GO:0072511 |
| 3244 | GO:0016832 | GO:0051905 | GO:0072507 |
| 3245 | GO:0016645 | GO:0051904 | GO:0072422 |
| 3246 | GO:0016624 | GO:0051899 | GO:0072413 |
| 3247 | GO:0016571 | GO:0051897 | GO:0072378 |
| 3248 | GO:0016569 | GO:0001704 | GO:0072376 |
| 3249 | GO:0016538 | GO:0051896 | GO:0072359 |
| 3250 | GO:0016514 | GO:0051883 | GO:0072350 |
| 3251 | GO:0016125 | GO:0051828 | GO:0072344 |
| 3252 | GO:0015985 | GO:0051817 | GO:0072338 |
| 3253 | GO:0015833 | GO:0051806 | GO:0072331 |
| 3254 | GO:0015031 | GO:0051798 | GO:0072330 |
| 3255 | GO:0014911 | GO:0051797 | GO:0072321 |
| 3256 | GO:0014066 | GO:0051785 | GO:0072216 |
| 3257 | GO:0010870 | GO:0051784 | GO:0071929 |
| 3258 | GO:0010817 | GO:0051783 | GO:0071921 |
| 3259 | GO:0010755 | GO:0001701 | GO:0071902 |
| 3260 | GO:0010714 | GO:0051782 | GO:0071897 |
| 3261 | GO:0010629 | GO:0051781 | GO:0071880 |
| 3262 | GO:0010605 | GO:0051726 | GO:0071875 |
| 3263 | GO:0010573 | GO:0051716 | GO:0071826 |
| 3264 | GO:0010558 | GO:0051707 | GO:0071824 |
| 3265 | GO:0010534 | GO:0051704 | GO:0071822 |
| 3266 | GO:0010468 | GO:0051701 | GO:0071806 |
| 3267 | GO:0009991 | GO:0051674 | GO:0071805 |
| 3268 | GO:0009967 | GO:0051668 | GO:0071804 |
| 3269 | GO:0009897 | GO:0051656 | GO:0071773 |
| 3270 | GO:0009894 | GO:0001696 | GO:0071772 |
| 3271 | GO:0009890 | GO:0051651 | GO:0071706 |
| 3272 | GO:0009792 | GO:0051650 | GO:0071695 |
| 3273 | GO:0009636 | GO:0051649 | GO:0071692 |
| 3274 | GO:0009260 | GO:0051648 | GO:0071675 |
| 3275 | GO:0009218 | GO:0051641 | GO:0071634 |
| 3276 | GO:0009199 | GO:0051640 | GO:0071621 |
| 3277 | GO:0009145 | GO:0051606 | GO:0071616 |
| 3278 | GO:0009135 | GO:0051604 | GO:0071604 |
| 3279 | GO:0008585 | GO:0051603 | GO:0071593 |
| 3280 | GO:0008284 | GO:0051588 | GO:0071560 |
| 3281 | GO:0008283 | GO:0001676 | GO:0071549 |
| 3282 | GO:0008276 | GO:0051574 | GO:0071548 |

|      |            |            |            |
|------|------------|------------|------------|
| 3283 | GO:0008236 | GO:0051573 | GO:0071502 |
| 3284 | GO:0008227 | GO:0051572 | GO:0071495 |
| 3285 | GO:0008206 | GO:0051571 | GO:0071466 |
| 3286 | GO:0008203 | GO:0051570 | GO:0071442 |
| 3287 | GO:0008176 | GO:0051569 | GO:0070670 |
| 3288 | GO:0008168 | GO:0051568 | GO:0071440 |
| 3289 | GO:0008104 | GO:0051567 | GO:0071431 |
| 3290 | GO:0007610 | GO:0051549 | GO:0071428 |
| 3291 | GO:0007568 | GO:0051547 | GO:0071426 |
| 3292 | GO:0007431 | GO:0001667 | GO:0071385 |
| 3293 | GO:0007229 | GO:0051546 | GO:0071384 |
| 3294 | GO:0007219 | GO:0051495 | GO:0071383 |
| 3295 | GO:0007215 | GO:0051494 | GO:0071378 |
| 3296 | GO:0007212 | GO:0051493 | GO:0071377 |
| 3297 | GO:0007210 | GO:0051481 | GO:0071363 |
| 3298 | GO:0007067 | GO:0051480 | GO:0071354 |
| 3299 | GO:0007045 | GO:0051461 | GO:0071322 |
| 3300 | GO:0006978 | GO:0051459 | GO:0071320 |
| 3301 | GO:0006950 | GO:0051444 | GO:0071168 |
| 3302 | GO:0006915 | GO:0051443 | GO:0071166 |
| 3303 | GO:0006836 | GO:0001655 | GO:0071158 |
| 3304 | GO:0006796 | GO:0051439 | GO:0071157 |
| 3305 | GO:0006757 | GO:0051438 | GO:0071156 |
| 3306 | GO:0006631 | GO:0051437 | GO:0071104 |
| 3307 | GO:0006282 | GO:0051436 | GO:0071103 |
| 3308 | GO:0006271 | GO:0051384 | GO:0071051 |
| 3309 | GO:0006167 | GO:0051352 | GO:0071049 |
| 3310 | GO:0006152 | GO:0051351 | GO:0071047 |
| 3311 | GO:0006122 | GO:0051350 | GO:0071046 |
| 3312 | GO:0006111 | GO:0051349 | GO:0071038 |
| 3313 | GO:0006104 | GO:0051348 | GO:0071035 |
| 3314 | GO:0006102 | GO:0001654 | GO:0071034 |
| 3315 | GO:0006098 | GO:0051347 | GO:0071033 |
| 3316 | GO:0005746 | GO:0051346 | GO:0071029 |
| 3317 | GO:0005549 | GO:0051345 | GO:0071027 |
| 3318 | GO:0005524 | GO:0051340 | GO:0070972 |
| 3319 | GO:0005178 | GO:0051339 | GO:0070932 |
| 3320 | GO:0005138 | GO:0051338 | GO:0070900 |
| 3321 | GO:0005126 | GO:0051336 | GO:0070846 |
| 3322 | GO:0004906 | GO:0051321 | GO:0070844 |
| 3323 | GO:0004812 | GO:0051310 | GO:0070830 |
| 3324 | GO:0004045 | GO:0051306 | GO:0070816 |
| 3325 | GO:0003018 | GO:0001649 | GO:0070741 |
| 3326 | GO:0003013 | GO:0051304 | GO:0070723 |
| 3327 | GO:0002805 | GO:0051303 | GO:0070665 |
| 3328 | GO:0002740 | GO:0051302 | GO:0070663 |
| 3329 | GO:0002689 | GO:0051301 | GO:0070661 |
| 3330 | GO:0002521 | GO:0051298 | GO:0070647 |
| 3331 | GO:0002376 | GO:0051297 | GO:0070633 |
| 3332 | GO:0002225 | GO:0051292 | GO:0070528 |
| 3333 | GO:0001944 | GO:0051289 | GO:0070509 |
| 3334 | GO:0001936 | GO:0051283 | GO:0070507 |
| 3335 | GO:0001933 | GO:0051282 | GO:0070486 |

|      |                 |            |            |
|------|-----------------|------------|------------|
| 3336 | GO:0001911      | GO:0001578 | GO:0070374 |
| 3337 | GO:0001741      | GO:0051276 | GO:0070372 |
| 3338 | GO:0001706      | GO:0051272 | GO:0070278 |
| 3339 | GO:0001655      | GO:0051271 | GO:0070272 |
| 3340 | GO:0001567      | GO:0051270 | GO:0070266 |
| 3341 | GO:0001523      | GO:0051262 | GO:0070230 |
| 3342 | GO:0001047      | GO:0051261 | GO:0070229 |
| 3343 | GO:0001046      | GO:0051260 | GO:0051092 |
| 3344 | GO:0001025      | GO:0051259 | GO:0070228 |
| 3345 | GO:0000470      | GO:0051258 | GO:0070227 |
| 3346 | GO:0000275      | GO:0051254 | GO:0070201 |
| 3347 | GO:0000183      | GO:0001568 | GO:0070168 |
| 3348 | GO:0000166      | GO:0051253 | GO:0070126 |
| 3349 | GO:0000083      | GO:0051252 | GO:0070124 |
| 3350 | GO:0000076      | GO:0051251 | GO:0070120 |
| 3351 | GO:0000060      | GO:0051250 | GO:0070102 |
| 3352 | ENSP00000355436 | GO:0051249 | GO:0070098 |
| 3353 | ENSP00000343505 | GO:0051248 | GO:0070085 |
| 3354 | ENSP00000317578 | GO:0051247 | GO:0070076 |
| 3355 | ENSP00000314193 | GO:0051246 | GO:0070071 |
| 3356 | ENSP00000264498 | GO:0051241 | GO:0065009 |
| 3357 | ENSP00000260563 | GO:0051240 | GO:0065008 |
| 3358 | ENSP00000255030 | GO:0001561 | GO:0065005 |
| 3359 | ENSP00000249075 | GO:0051239 | GO:0065003 |
| 3360 | hsa05215        | GO:0051238 | GO:0065002 |
| 3361 | hsa05205        | GO:0051236 | GO:0061732 |
| 3362 | hsa05203        | GO:0051235 | GO:0061718 |
| 3363 | hsa05142        | GO:0051234 | GO:0061647 |
| 3364 | hsa04810        | GO:0051225 | GO:0061641 |
| 3365 | hsa04750        | GO:0051223 | GO:0061640 |
| 3366 | hsa03010        | GO:0051222 | GO:0010942 |
| 3367 | GO:2001141      | GO:0051220 | GO:0061620 |
| 3368 | GO:2000615      | GO:0051216 | GO:0061615 |
| 3369 | GO:2000404      | GO:0001558 | GO:0061572 |
| 3370 | GO:2000181      | GO:0051209 | GO:0061564 |
| 3371 | GO:2000145      | GO:0051208 | GO:0061518 |
| 3372 | GO:2000134      | GO:0051188 | GO:0061517 |
| 3373 | GO:1990266      | GO:0051187 | GO:0061458 |
| 3374 | GO:1904874      | GO:0051186 | GO:0061430 |
| 3375 | GO:1904851      | GO:0051179 | GO:0061198 |
| 3376 | GO:1903530      | GO:0051174 | GO:0061197 |
| 3377 | GO:1903312      | GO:0051173 | GO:0061196 |
| 3378 | GO:1902807      | GO:0051172 | GO:0061136 |
| 3379 | GO:1902750      | GO:0051171 | GO:0061098 |
| 3380 | GO:1902749      | GO:0001542 | GO:0061097 |
| 3381 | GO:1902679      | GO:0051170 | GO:0061078 |
| 3382 | GO:1902533      | GO:0051169 | GO:0061077 |
| 3383 | GO:1902105      | GO:0051168 | GO:0061061 |
| 3384 | GO:1901991      | GO:0051156 | GO:0061041 |
| 3385 | GO:1901522      | GO:0051148 | GO:0061035 |
| 3386 | GO:1901342      | GO:0051131 | GO:0061028 |
| 3387 | GO:1901299      | GO:0051130 | GO:0061024 |
| 3388 | GO:1901016      | GO:0051129 | GO:0060968 |



|      |            |            |            |
|------|------------|------------|------------|
| 3389 | GO:1900084 | GO:0051128 | GO:0060765 |
| 3390 | GO:1900003 | GO:0051123 | GO:0060713 |
| 3391 | GO:0099531 | GO:0001525 | GO:0060669 |
| 3392 | GO:0098857 | GO:0051101 | GO:0060664 |
| 3393 | GO:0098771 | GO:0051098 | GO:0060627 |
| 3394 | GO:0098655 | GO:0051094 | GO:0060591 |
| 3395 | GO:0098602 | GO:0051093 | GO:2001233 |
| 3396 | GO:0097659 | GO:0051092 | GO:0060491 |
| 3397 | GO:0097553 | GO:0051091 | GO:0060463 |
| 3398 | GO:0097531 | GO:0051090 | GO:0060462 |
| 3399 | GO:0090386 | GO:0051081 | GO:0060456 |
| 3400 | GO:0090280 | GO:0051057 | GO:0060429 |
| 3401 | GO:0090130 | GO:0051056 | GO:0060416 |
| 3402 | GO:0090066 | GO:0001523 | GO:0060396 |
| 3403 | GO:0086012 | GO:0051053 | GO:0060351 |
| 3404 | GO:0086003 | GO:0051052 | GO:0060350 |
| 3405 | GO:0072593 | GO:0051051 | GO:1902531 |
| 3406 | GO:0072507 | GO:0051050 | GO:0060349 |
| 3407 | GO:0072344 | GO:0051049 | GO:0060348 |
| 3408 | GO:0071921 | GO:0051048 | GO:0060346 |
| 3409 | GO:0071622 | GO:0051047 | GO:0060325 |
| 3410 | GO:0071442 | GO:0051046 | GO:0060323 |
| 3411 | GO:0071428 | GO:0051045 | GO:0060312 |
| 3412 | GO:0071417 | GO:0051044 | GO:0060311 |
| 3413 | GO:0071391 | GO:0001522 | GO:0060310 |
| 3414 | GO:0071378 | GO:0051043 | GO:0060309 |
| 3415 | GO:0071158 | GO:0051031 | GO:0060292 |
| 3416 | GO:0071062 | GO:0051028 | GO:0060284 |
| 3417 | GO:0071031 | GO:0051017 | GO:0060271 |
| 3418 | GO:0071027 | GO:0051001 | GO:0060261 |
| 3419 | GO:0070371 | GO:0050999 | GO:0060260 |
| 3420 | GO:0070229 | GO:0050965 | GO:0060218 |
| 3421 | GO:0070228 | GO:0050962 | GO:0060216 |
| 3422 | GO:0070181 | GO:0050961 | GO:0060191 |
| 3423 | GO:0070120 | GO:0050954 | GO:0060135 |
| 3424 | GO:0065007 | GO:0001510 | GO:0060083 |
| 3425 | GO:0061617 | GO:0050951 | GO:0060073 |
| 3426 | GO:0061430 | GO:0050930 | GO:0060071 |
| 3427 | GO:0061138 | GO:0050927 | GO:0060029 |
| 3428 | GO:0060664 | GO:0050926 | GO:0060027 |
| 3429 | GO:0060284 | GO:0050921 | GO:0060021 |
| 3430 | GO:0060193 | GO:0050920 | GO:0055119 |
| 3431 | GO:0055086 | GO:0050918 | GO:0055114 |
| 3432 | GO:0055075 | GO:0050917 | GO:0055108 |
| 3433 | GO:0051962 | GO:0050911 | GO:0055082 |
| 3434 | GO:0051952 | GO:0050909 | GO:0055080 |
| 3435 | GO:0051924 | GO:0001508 | GO:0055078 |
| 3436 | GO:0051480 | GO:0050907 | GO:0055075 |
| 3437 | GO:0051443 | GO:0050906 | GO:0055074 |
| 3438 | GO:0051347 | GO:0050901 | GO:0055067 |
| 3439 | GO:0051339 | GO:0050900 | GO:0052652 |
| 3440 | GO:0051292 | GO:0050896 | GO:0052312 |
| 3441 | GO:0051271 | GO:0050890 | GO:0052200 |

|      |            |            |            |
|------|------------|------------|------------|
| 3442 | GO:0051250 | GO:0050886 | GO:0052192 |
| 3443 | GO:0051246 | GO:0050880 | GO:0052126 |
| 3444 | GO:0051209 | GO:0050878 | GO:0051984 |
| 3445 | GO:0051173 | GO:0050877 | GO:0051969 |
| 3446 | GO:0051156 | GO:0001505 | GO:0051966 |
| 3447 | GO:0051129 | GO:0050871 | GO:0051962 |
| 3448 | GO:0051051 | GO:0050870 | GO:0002253 |
| 3449 | GO:0051049 | GO:0050868 | GO:0051961 |
| 3450 | GO:0050927 | GO:0050867 | GO:0051960 |
| 3451 | GO:0050901 | GO:0050866 | GO:0051952 |
| 3452 | GO:0050868 | GO:0050865 | GO:0051937 |
| 3453 | GO:0048870 | GO:0050863 | GO:0051932 |
| 3454 | GO:0048869 | GO:0050857 | GO:0051931 |
| 3455 | GO:0048812 | GO:0050856 | GO:0051930 |
| 3456 | GO:0048666 | GO:0050854 | GO:0051928 |
| 3457 | GO:0048659 | GO:0001503 | GO:0051918 |
| 3458 | GO:0048017 | GO:0050852 | GO:0051917 |
| 3459 | GO:0046879 | GO:0050851 | GO:0051905 |
| 3460 | GO:0046660 | GO:0050848 | GO:0051904 |
| 3461 | GO:0045944 | GO:0050832 | GO:0051897 |
| 3462 | GO:0045934 | GO:0050830 | GO:0051896 |
| 3463 | GO:0045893 | GO:0050829 | GO:0051883 |
| 3464 | GO:0045860 | GO:0050820 | GO:0051828 |
| 3465 | GO:0045839 | GO:0050819 | GO:0051806 |
| 3466 | GO:0045785 | GO:0050818 | GO:0051798 |
| 3467 | GO:0045321 | GO:0050817 | GO:0051797 |
| 3468 | GO:0045277 | GO:0001502 | GO:0051785 |
| 3469 | GO:0045165 | GO:0050812 | GO:0051784 |
| 3470 | GO:0044767 | GO:0050810 | GO:0051783 |
| 3471 | GO:0044259 | GO:0050806 | GO:0051782 |
| 3472 | GO:0044238 | GO:0050805 | GO:0051781 |
| 3473 | GO:0044154 | GO:0050804 | GO:0051726 |
| 3474 | GO:0044092 | GO:0050803 | GO:0051716 |
| 3475 | GO:0044062 | GO:0050802 | GO:0051707 |
| 3476 | GO:0043603 | GO:0050801 | GO:0051701 |
| 3477 | GO:0043549 | GO:0050796 | GO:0051674 |
| 3478 | GO:0043527 | GO:0050795 | GO:0051656 |
| 3479 | GO:0043461 | GO:0001501 | GO:0051650 |
| 3480 | GO:0043436 | GO:0050794 | GO:0051641 |
| 3481 | GO:0043025 | GO:0050793 | GO:0051640 |
| 3482 | GO:0042737 | GO:0050792 | GO:0051573 |
| 3483 | GO:0042564 | GO:0050790 | GO:0051572 |
| 3484 | GO:0042509 | GO:0050789 | GO:0051569 |
| 3485 | GO:0042476 | GO:0050778 | GO:0051567 |
| 3486 | GO:0040017 | GO:0050777 | GO:0051549 |
| 3487 | GO:0040008 | GO:0050776 | GO:0051547 |
| 3488 | GO:0038111 | GO:0050767 | GO:0051495 |
| 3489 | GO:0035914 | GO:0050755 | GO:0051493 |
| 3490 | GO:0035637 | GO:0001306 | GO:0051461 |
| 3491 | GO:0035272 | GO:0050748 | GO:0051444 |
| 3492 | GO:0035257 | GO:0050731 | GO:0051443 |
| 3493 | GO:0034767 | GO:0050730 | GO:0051439 |
| 3494 | GO:0034764 | GO:0050729 | GO:0051436 |

|      |            |            |            |
|------|------------|------------|------------|
| 3495 | GO:0034762 | GO:0050728 | GO:0051352 |
| 3496 | GO:0034654 | GO:0050727 | GO:0051350 |
| 3497 | GO:0034645 | GO:0050715 | GO:0051349 |
| 3498 | GO:0034443 | GO:0050714 | GO:0051348 |
| 3499 | GO:0034388 | GO:0050710 | GO:0051346 |
| 3500 | GO:0034243 | GO:0050709 | GO:0051338 |
| 3501 | GO:0034220 | GO:0001189 | GO:0051310 |
| 3502 | GO:0034212 | GO:0050708 | GO:0051306 |
| 3503 | GO:0033688 | GO:0050707 | GO:0051304 |
| 3504 | GO:0033674 | GO:0050686 | GO:0045087 |
| 3505 | GO:0033615 | GO:0050685 | GO:0051302 |
| 3506 | GO:0033554 | GO:0050684 | GO:0051301 |
| 3507 | GO:0033539 | GO:0050680 | GO:0051297 |
| 3508 | GO:0033319 | GO:0050679 | GO:0051292 |
| 3509 | GO:0033177 | GO:0050678 | GO:0051289 |
| 3510 | GO:0033135 | GO:0050673 | GO:0051283 |
| 3511 | GO:0032940 | GO:0050671 | GO:0051282 |
| 3512 | GO:0032881 | GO:0001188 | GO:0051259 |
| 3513 | GO:0032879 | GO:0050670 | GO:0051253 |
| 3514 | GO:0032844 | GO:0050663 | GO:0051251 |
| 3515 | GO:0032602 | GO:0050658 | GO:0051250 |
| 3516 | GO:0032508 | GO:0050657 | GO:0051249 |
| 3517 | GO:0032451 | GO:0050654 | GO:0051247 |
| 3518 | GO:0032226 | GO:0050435 | GO:0051246 |
| 3519 | GO:0031941 | GO:0050434 | GO:0051241 |
| 3520 | GO:0031821 | GO:0050432 | GO:0051238 |
| 3521 | GO:0031401 | GO:0050000 | GO:0051235 |
| 3522 | GO:0031325 | GO:0048878 | GO:0051223 |
| 3523 | GO:0031295 | GO:0001180 | GO:0051222 |
| 3524 | GO:0031062 | GO:0048871 | GO:0051220 |
| 3525 | GO:0031058 | GO:0048870 | GO:0051209 |
| 3526 | GO:0030934 | GO:0048869 | GO:0051188 |
| 3527 | GO:0030823 | GO:0048863 | GO:0051187 |
| 3528 | GO:0030538 | GO:0048861 | GO:0051156 |
| 3529 | GO:0030522 | GO:0048858 | GO:0051148 |
| 3530 | GO:0030425 | GO:0048856 | GO:0051131 |
| 3531 | GO:0030200 | GO:0048840 | GO:0051128 |
| 3532 | GO:0030168 | GO:0048812 | GO:0051123 |
| 3533 | GO:0030167 | GO:0048771 | GO:0051101 |
| 3534 | GO:0030155 | GO:0001101 | GO:0051098 |
| 3535 | GO:0030073 | GO:0048742 | GO:0051094 |
| 3536 | GO:0023056 | GO:0048732 | GO:0051093 |
| 3537 | GO:0022904 | GO:0048731 | GO:0051090 |
| 3538 | GO:0022627 | GO:0048729 | GO:0060548 |
| 3539 | GO:0022610 | GO:0048705 | GO:0051081 |
| 3540 | GO:0022602 | GO:0048699 | GO:0051047 |
| 3541 | GO:0022414 | GO:0048667 | GO:0051045 |
| 3542 | GO:0022008 | GO:0048666 | GO:0051044 |
| 3543 | GO:0020037 | GO:0048661 | GO:0051043 |
| 3544 | GO:0019908 | GO:0048660 | GO:0051017 |
| 3545 | GO:0019693 | GO:0000967 | GO:0051001 |
| 3546 | GO:0019068 | GO:0048659 | GO:0050999 |
| 3547 | GO:0018216 | GO:0048646 | GO:0050965 |

|      |            |            |            |
|------|------------|------------|------------|
| 3548 | GO:0016896 | GO:0048640 | GO:0050961 |
| 3549 | GO:0016817 | GO:0048639 | GO:0050930 |
| 3550 | GO:0016602 | GO:0048609 | GO:0050926 |
| 3551 | GO:0016584 | GO:0048608 | GO:0050920 |
| 3552 | GO:0016055 | GO:0048598 | GO:0050918 |
| 3553 | GO:0015849 | GO:0048589 | GO:0050901 |
| 3554 | GO:0015464 | GO:0048585 | GO:0050868 |
| 3555 | GO:0014912 | GO:0048584 | GO:0050866 |
| 3556 | GO:0014909 | GO:0000966 | GO:0050863 |
| 3557 | GO:0014848 | GO:0048583 | GO:0050857 |
| 3558 | GO:0014069 | GO:0048568 | GO:0050856 |
| 3559 | GO:0010972 | GO:0048553 | GO:0050852 |
| 3560 | GO:0010951 | GO:0048545 | GO:0050851 |
| 3561 | GO:0010942 | GO:0048534 | GO:0050832 |
| 3562 | GO:0010810 | GO:0048524 | GO:0050829 |
| 3563 | GO:0010647 | GO:0048523 | GO:0050806 |
| 3564 | GO:0010632 | GO:0048522 | GO:0050805 |
| 3565 | GO:0010576 | GO:0048521 | GO:0050803 |
| 3566 | GO:0010556 | GO:0048520 | GO:0050801 |
| 3567 | GO:0010543 | GO:0000963 | GO:0050796 |
| 3568 | GO:0010517 | GO:0048519 | GO:0050795 |
| 3569 | GO:0010389 | GO:0048518 | GO:0050792 |
| 3570 | GO:0009898 | GO:0048514 | GO:0050790 |
| 3571 | GO:0009891 | GO:0048513 | GO:0050778 |
| 3572 | GO:0009653 | GO:0048511 | GO:0050767 |
| 3573 | GO:0009259 | GO:0048489 | GO:0050748 |
| 3574 | GO:0009206 | GO:0048468 | GO:0050729 |
| 3575 | GO:0009205 | GO:0048387 | GO:0050728 |
| 3576 | GO:0009156 | GO:0048385 | GO:0050727 |
| 3577 | GO:0009141 | GO:0048384 | GO:0050710 |
| 3578 | GO:0009117 | GO:0000959 | GO:0050707 |
| 3579 | GO:0009112 | GO:0048285 | GO:0050680 |
| 3580 | GO:0009111 | GO:0048263 | GO:0050678 |
| 3581 | GO:0009068 | GO:0048262 | GO:0050670 |
| 3582 | GO:0009065 | GO:0048260 | GO:0050658 |
| 3583 | GO:0008395 | GO:0048259 | GO:0050657 |
| 3584 | GO:0007420 | GO:0048254 | GO:0050654 |
| 3585 | GO:0007194 | GO:0048247 | GO:0050432 |
| 3586 | GO:0007190 | GO:0048246 | GO:0050000 |
| 3587 | GO:0007178 | GO:0048245 | GO:0048878 |
| 3588 | GO:0007044 | GO:0048243 | GO:0048871 |
| 3589 | GO:0006883 | GO:0000956 | GO:0048870 |
| 3590 | GO:0006875 | GO:0048232 | GO:0048863 |
| 3591 | GO:0006780 | GO:0048193 | GO:0048840 |
| 3592 | GO:0006754 | GO:0048167 | GO:0048742 |
| 3593 | GO:0006739 | GO:0048146 | GO:0048732 |
| 3594 | GO:0006735 | GO:0048144 | GO:0048589 |
| 3595 | GO:0006701 | GO:0048041 | GO:0048568 |
| 3596 | GO:0006614 | GO:0048017 | GO:0048553 |
| 3597 | GO:0006544 | GO:0048011 | GO:0048520 |
| 3598 | GO:0006541 | GO:0048010 | GO:0048511 |
| 3599 | GO:0006509 | GO:0048009 | GO:0048489 |
| 3600 | GO:0006482 | GO:0000910 | GO:0048387 |

|      |                 |            |            |
|------|-----------------|------------|------------|
| 3601 | GO:0006476      | GO:0048002 | GO:0048385 |
| 3602 | GO:0006450      | GO:0046950 | GO:0048262 |
| 3603 | GO:0006414      | GO:0046949 | GO:0048260 |
| 3604 | GO:0006409      | GO:0046942 | GO:0048254 |
| 3605 | GO:0006402      | GO:0046939 | GO:0048247 |
| 3606 | GO:0006369      | GO:0046931 | GO:0048246 |
| 3607 | GO:0006362      | GO:0046928 | GO:0048245 |
| 3608 | GO:0006357      | GO:0046909 | GO:0048146 |
| 3609 | GO:0006355      | GO:0046907 | GO:0048144 |
| 3610 | GO:0006351      | GO:0046903 | GO:0048041 |
| 3611 | GO:0006335      | GO:0000904 | GO:0048017 |
| 3612 | GO:0006303      | GO:0046888 | GO:0048009 |
| 3613 | GO:0006164      | GO:0046883 | GO:0048002 |
| 3614 | GO:0006101      | GO:0046879 | GO:0046942 |
| 3615 | GO:0006096      | GO:0046851 | GO:0046939 |
| 3616 | GO:0006024      | GO:0046850 | GO:0046931 |
| 3617 | GO:0005744      | GO:0046849 | GO:0046928 |
| 3618 | GO:0005677      | GO:0046847 | GO:0046909 |
| 3619 | GO:0005671      | GO:0046824 | GO:0046903 |
| 3620 | GO:0005201      | GO:0046822 | GO:0046888 |
| 3621 | GO:0004913      | GO:0046794 | GO:0046879 |
| 3622 | GO:0004518      | GO:0000902 | GO:0046851 |
| 3623 | GO:0004448      | GO:0046785 | GO:0046850 |
| 3624 | GO:0004129      | GO:0046782 | GO:0046849 |
| 3625 | GO:0003678      | GO:0046718 | GO:0046847 |
| 3626 | GO:0003417      | GO:0046717 | GO:1903649 |
| 3627 | GO:0003081      | GO:0046710 | GO:0046824 |
| 3628 | GO:0002791      | GO:0046700 | GO:0046822 |
| 3629 | GO:0002790      | GO:0046697 | GO:0046718 |
| 3630 | GO:0002779      | GO:0046689 | GO:0046717 |
| 3631 | GO:0002701      | GO:0046660 | GO:0046700 |
| 3632 | GO:0002685      | GO:0046653 | GO:0046697 |
| 3633 | GO:0002673      | GO:0000819 | GO:0046660 |
| 3634 | GO:0002223      | GO:0046651 | GO:0046653 |
| 3635 | GO:0001968      | GO:0046649 | GO:0046599 |
| 3636 | GO:0001940      | GO:0046605 | GO:0046579 |
| 3637 | GO:0001906      | GO:0046599 | GO:0046578 |
| 3638 | GO:0001878      | GO:0046579 | GO:0046546 |
| 3639 | GO:0001667      | GO:0046578 | GO:0046541 |
| 3640 | GO:0001522      | GO:0046546 | GO:0046502 |
| 3641 | GO:0001190      | GO:0046545 | GO:0046487 |
| 3642 | GO:0000451      | GO:0046541 | GO:0046440 |
| 3643 | GO:0000179      | GO:0046502 | GO:0046427 |
| 3644 | GO:0000165      | GO:0000729 | GO:0046395 |
| 3645 | GO:0000075      | GO:0046496 | GO:0046364 |
| 3646 | ENSP00000416330 | GO:0046488 | GO:0046330 |
| 3647 | ENSP00000408153 | GO:0046487 | GO:0046165 |
| 3648 | ENSP00000403536 | GO:0046483 | GO:0046164 |
| 3649 | ENSP00000377446 | GO:0046467 | GO:0046160 |
| 3650 | ENSP00000362105 | GO:0046440 | GO:0046148 |
| 3651 | ENSP00000360828 | GO:0046427 | GO:0046103 |
| 3652 | ENSP00000358812 | GO:0046425 | GO:0046102 |
| 3653 | ENSP00000358563 | GO:0046395 | GO:0046049 |

|      |                 |            |            |
|------|-----------------|------------|------------|
| 3654 | ENSP00000342056 | GO:0046394 | GO:0045995 |
| 3655 | ENSP00000319771 | GO:0000726 | GO:0045992 |
| 3656 | ENSP00000312652 | GO:0046390 | GO:0045953 |
| 3657 | ENSP00000311977 | GO:0046365 | GO:0045943 |
| 3658 | ENSP00000309565 | GO:0046364 | GO:0051704 |
| 3659 | ENSP00000308938 | GO:0046330 | GO:0045933 |
| 3660 | ENSP00000290866 | GO:0046209 | GO:0045932 |
| 3661 | ENSP00000263339 | GO:0046165 | GO:0045930 |
| 3662 | ENSP00000263239 | GO:0046164 | GO:0045927 |
| 3663 | ENSP00000261406 | GO:0046160 | GO:0045926 |
| 3664 | ENSP00000234170 | GO:0046148 | GO:0045921 |
| 3665 | ENSP00000222567 | GO:0046132 | GO:0045907 |
| 3666 | ENSP00000216254 | GO:0000725 | GO:0045906 |
| 3667 | hsa05144        | GO:0046129 | GO:0045903 |
| 3668 | hsa04723        | GO:0046128 | GO:0045860 |
| 3669 | hsa03020        | GO:0046112 | GO:0045859 |
| 3670 | hsa00980        | GO:0046103 | GO:0045840 |
| 3671 | hsa00670        | GO:0046102 | GO:0045839 |
| 3672 | hsa00533        | GO:0046085 | GO:0045834 |
| 3673 | GO:2000833      | GO:0046058 | GO:0045815 |
| 3674 | GO:2000757      | GO:0046049 | GO:0045786 |
| 3675 | GO:2000756      | GO:0046040 | GO:0045785 |
| 3676 | GO:2000403      | GO:0046037 | GO:0045778 |
| 3677 | GO:2000257      | GO:0000724 | GO:0045777 |
| 3678 | GO:2000113      | GO:0046034 | GO:0045766 |
| 3679 | GO:1990748      | GO:0046031 | GO:0045765 |
| 3680 | GO:1903555      | GO:0045995 | GO:0045762 |
| 3681 | GO:1903531      | GO:0045992 | GO:0045761 |
| 3682 | GO:1903310      | GO:0045991 | GO:0045760 |
| 3683 | GO:1902998      | GO:0045988 | GO:0045739 |
| 3684 | GO:1902680      | GO:0045981 | GO:0045732 |
| 3685 | GO:1902531      | GO:0045953 | GO:0045721 |
| 3686 | GO:1902476      | GO:0045944 | GO:0045666 |
| 3687 | GO:1902275      | GO:0045943 | GO:0045637 |
| 3688 | GO:1902099      | GO:0000723 | GO:0045621 |
| 3689 | GO:1901701      | GO:0045940 | GO:0045597 |
| 3690 | GO:1901698      | GO:0045937 | GO:0045582 |
| 3691 | GO:1901657      | GO:0045935 | GO:0045454 |
| 3692 | GO:1901576      | GO:0045934 | GO:0045446 |
| 3693 | GO:0099528      | GO:0045933 | GO:0045329 |
| 3694 | GO:0098562      | GO:0045932 | GO:0045324 |
| 3695 | GO:0097581      | GO:0045930 | GO:0045321 |
| 3696 | GO:0097530      | GO:0045927 | GO:0045216 |
| 3697 | GO:0097529      | GO:0045926 | GO:0045188 |
| 3698 | GO:0097025      | GO:0045921 | GO:0045187 |
| 3699 | GO:0090505      | GO:0000715 | GO:0045176 |
| 3700 | GO:0090184      | GO:0045907 | GO:0045123 |
| 3701 | GO:0090178      | GO:0045906 | GO:0045055 |
| 3702 | GO:0090087      | GO:0045903 | GO:0045047 |
| 3703 | GO:0090003      | GO:0045893 | GO:0045046 |
| 3704 | GO:0072657      | GO:0045892 | GO:0045039 |
| 3705 | GO:0072588      | GO:0045862 | GO:0045022 |
| 3706 | GO:0072413      | GO:0045861 | GO:0045005 |

|      |            |            |            |
|------|------------|------------|------------|
| 3707 | GO:0072401 | GO:0045860 | GO:0044851 |
| 3708 | GO:0071900 | GO:0045859 | GO:0044849 |
| 3709 | GO:0071772 | GO:0045841 | GO:0044843 |
| 3710 | GO:0071692 | GO:0000480 | GO:0044818 |
| 3711 | GO:0071604 | GO:0045840 | GO:0044802 |
| 3712 | GO:0071560 | GO:0045839 | GO:0044783 |
| 3713 | GO:0071502 | GO:0045834 | GO:0044782 |
| 3714 | GO:0071495 | GO:0045815 | GO:0044774 |
| 3715 | GO:0071440 | GO:0045814 | GO:0044770 |
| 3716 | GO:0071363 | GO:0045807 | GO:0044766 |
| 3717 | GO:0071173 | GO:0045787 | GO:0044765 |
| 3718 | GO:0071157 | GO:0045786 | GO:0044706 |
| 3719 | GO:0071047 | GO:0045785 | GO:0044703 |
| 3720 | GO:0071033 | GO:0045778 | GO:0010941 |
| 3721 | GO:0070993 | GO:0000479 | GO:0044364 |
| 3722 | GO:0070816 | GO:0045777 | GO:0044344 |
| 3723 | GO:0070761 | GO:0045766 | GO:0044273 |
| 3724 | GO:0070615 | GO:0045765 | GO:0044270 |
| 3725 | GO:0070585 | GO:0045762 | GO:0044267 |
| 3726 | GO:0070509 | GO:0045761 | GO:0044259 |
| 3727 | GO:0070126 | GO:0045760 | GO:0044248 |
| 3728 | GO:0070110 | GO:0045744 | GO:0044243 |
| 3729 | GO:0070102 | GO:0045739 | GO:0044242 |
| 3730 | GO:0065009 | GO:0045732 | GO:0044092 |
| 3731 | GO:0061733 | GO:0045721 | GO:0044089 |
| 3732 | GO:0061647 | GO:0000478 | GO:0044085 |
| 3733 | GO:0061061 | GO:0045669 | GO:0044070 |
| 3734 | GO:0060462 | GO:0045667 | GO:0044062 |
| 3735 | GO:0060351 | GO:0045666 | GO:0044060 |
| 3736 | GO:0060341 | GO:0045664 | GO:0044058 |
| 3737 | GO:0060083 | GO:0045662 | GO:0043983 |
| 3738 | GO:0055065 | GO:0045661 | GO:0043974 |
| 3739 | GO:0052890 | GO:0045637 | GO:0043970 |
| 3740 | GO:0052652 | GO:0045621 | GO:0043969 |
| 3741 | GO:0051937 | GO:0045619 | GO:0043932 |
| 3742 | GO:0051897 | GO:0045597 | GO:0043921 |
| 3743 | GO:0051798 | GO:0000472 | GO:0043903 |
| 3744 | GO:0051786 | GO:0045596 | GO:0043902 |
| 3745 | GO:0051649 | GO:0045595 | GO:0043901 |
| 3746 | GO:0051547 | GO:0045582 | GO:0043648 |
| 3747 | GO:0051444 | GO:0045580 | GO:0043634 |
| 3748 | GO:0051338 | GO:0045454 | GO:0043633 |
| 3749 | GO:0051306 | GO:0045453 | GO:0043627 |
| 3750 | GO:0051282 | GO:0045446 | GO:0043624 |
| 3751 | GO:0051253 | GO:0045445 | GO:0043618 |
| 3752 | GO:0051249 | GO:0045428 | GO:0043604 |
| 3753 | GO:0051239 | GO:0045333 | GO:0043588 |
| 3754 | GO:0051172 | GO:0000470 | GO:0043587 |
| 3755 | GO:0051170 | GO:0045329 | GO:0043568 |
| 3756 | GO:0051130 | GO:0045324 | GO:0043567 |
| 3757 | GO:0051044 | GO:0045321 | GO:0043543 |
| 3758 | GO:0051017 | GO:0045216 | GO:0043488 |
| 3759 | GO:0050961 | GO:0045188 | GO:0043486 |

|      |            |            |            |
|------|------------|------------|------------|
| 3760 | GO:0050930 | GO:0045187 | GO:0043461 |
| 3761 | GO:0050921 | GO:0045185 | GO:0043434 |
| 3762 | GO:0050878 | GO:0045184 | GO:0043433 |
| 3763 | GO:0050777 | GO:0045176 | GO:0043414 |
| 3764 | GO:0050710 | GO:0045165 | GO:0043412 |
| 3765 | GO:0048771 | GO:0000469 | GO:0043408 |
| 3766 | GO:0048660 | GO:0045137 | GO:0043406 |
| 3767 | GO:0048585 | GO:0045123 | GO:0043388 |
| 3768 | GO:0048534 | GO:0045087 | GO:0043269 |
| 3769 | GO:0048514 | GO:0045055 | GO:0043268 |
| 3770 | GO:0048262 | GO:0045047 | GO:0006950 |
| 3771 | GO:0048243 | GO:0045046 | GO:0043266 |
| 3772 | GO:0046651 | GO:0045039 | GO:0043254 |
| 3773 | GO:0046554 | GO:0045022 | GO:0043244 |
| 3774 | GO:0046209 | GO:0045005 | GO:0043241 |
| 3775 | GO:0045953 | GO:0044851 | GO:0043207 |
| 3776 | GO:0045940 | GO:0000467 | GO:0043129 |
| 3777 | GO:0045892 | GO:0044849 | GO:0043114 |
| 3778 | GO:0045597 | GO:0044843 | GO:0043112 |
| 3779 | GO:0045428 | GO:0044839 | GO:0043085 |
| 3780 | GO:0044851 | GO:0044819 | GO:0043069 |
| 3781 | GO:0044784 | GO:0044818 | GO:0043065 |
| 3782 | GO:0044774 | GO:0044802 | GO:0043044 |
| 3783 | GO:0044093 | GO:0044786 | GO:0043043 |
| 3784 | GO:0043932 | GO:0044784 | GO:0043032 |
| 3785 | GO:0043633 | GO:0044783 | GO:0042981 |
| 3786 | GO:0043491 | GO:0044782 | GO:0042977 |
| 3787 | GO:0043393 | GO:0000466 | GO:0042976 |
| 3788 | GO:0043194 | GO:0044774 | GO:0042776 |
| 3789 | GO:0043177 | GO:0044773 | GO:0042773 |
| 3790 | GO:0043161 | GO:0044772 | GO:0042772 |
| 3791 | GO:0043069 | GO:0044770 | GO:0042771 |
| 3792 | GO:0043067 | GO:0044767 | GO:0042748 |
| 3793 | GO:0042981 | GO:0044766 | GO:0042744 |
| 3794 | GO:0042800 | GO:0044765 | GO:0042743 |
| 3795 | GO:0042776 | GO:0044764 | GO:0042742 |
| 3796 | GO:0042772 | GO:0044763 | GO:0042738 |
| 3797 | GO:0042698 | GO:0044743 | GO:0042737 |
| 3798 | GO:0042626 | GO:0000463 | GO:0042699 |
| 3799 | GO:0042503 | GO:0044728 | GO:0042635 |
| 3800 | GO:0042107 | GO:0044724 | GO:0042592 |
| 3801 | GO:0042104 | GO:0044723 | GO:0042558 |
| 3802 | GO:0042098 | GO:0044712 | GO:0042534 |
| 3803 | GO:0042089 | GO:0044711 | GO:0042533 |
| 3804 | GO:0040012 | GO:0044710 | GO:0042531 |
| 3805 | GO:0040011 | GO:0044708 | GO:0042516 |
| 3806 | GO:0038164 | GO:0044707 | GO:0042503 |
| 3807 | GO:0038162 | GO:0044706 | GO:0042493 |
| 3808 | GO:0038094 | GO:0044703 | GO:0042476 |
| 3809 | GO:0038043 | GO:0000462 | GO:0042455 |
| 3810 | GO:0036002 | GO:0044702 | GO:0042451 |
| 3811 | GO:0035948 | GO:0044700 | GO:0042448 |
| 3812 | GO:0035947 | GO:0044699 | GO:0042446 |



|      |            |            |            |
|------|------------|------------|------------|
| 3813 | GO:0035815 | GO:0044419 | GO:0042445 |
| 3814 | GO:0035766 | GO:0044409 | GO:0042407 |
| 3815 | GO:0035490 | GO:0044403 | GO:0002684 |
| 3816 | GO:0035258 | GO:0044364 | GO:0042398 |
| 3817 | GO:0035246 | GO:0044344 | GO:0042384 |
| 3818 | GO:0035242 | GO:0044283 | GO:0042363 |
| 3819 | GO:0034968 | GO:0044282 | GO:0042359 |
| 3820 | GO:0034603 | GO:0000460 | GO:0042339 |
| 3821 | GO:0034472 | GO:0044281 | GO:0042278 |
| 3822 | GO:0034462 | GO:0044273 | GO:0042276 |
| 3823 | GO:0034427 | GO:0044272 | GO:0042274 |
| 3824 | GO:0033559 | GO:0044271 | GO:0042273 |
| 3825 | GO:0032965 | GO:0044270 | GO:0042255 |
| 3826 | GO:0032943 | GO:0044267 | GO:0042249 |
| 3827 | GO:0032722 | GO:0044265 | GO:0042246 |
| 3828 | GO:0032680 | GO:0044260 | GO:0042181 |
| 3829 | GO:0032571 | GO:0044259 | GO:0042176 |
| 3830 | GO:0032549 | GO:0044257 | GO:0042168 |
| 3831 | GO:0032270 | GO:0000459 | GO:0042160 |
| 3832 | GO:0031571 | GO:0044255 | GO:0042157 |
| 3833 | GO:0031400 | GO:0044253 | GO:0042147 |
| 3834 | GO:0031399 | GO:0044249 | GO:0042127 |
| 3835 | GO:0031327 | GO:0044248 | GO:0042113 |
| 3836 | GO:0031175 | GO:0044246 | GO:0042104 |
| 3837 | GO:0031125 | GO:0044243 | GO:0042098 |
| 3838 | GO:0030849 | GO:0044242 | GO:0042059 |
| 3839 | GO:0030832 | GO:0044238 | GO:0042036 |
| 3840 | GO:0030814 | GO:0044237 | GO:0042035 |
| 3841 | GO:0030810 | GO:0044236 | GO:0042033 |
| 3842 | GO:0030808 | GO:0000453 | GO:0040029 |
| 3843 | GO:0030804 | GO:0044205 | GO:0040012 |
| 3844 | GO:0030673 | GO:0044154 | GO:0040011 |
| 3845 | GO:0030523 | GO:0044093 | GO:0040008 |
| 3846 | GO:0030500 | GO:0044092 | GO:0040007 |
| 3847 | GO:0030336 | GO:0044089 | GO:0039519 |
| 3848 | GO:0030334 | GO:0044087 | GO:0038165 |
| 3849 | GO:0030321 | GO:0044085 | GO:0038162 |
| 3850 | GO:0030217 | GO:0044070 | GO:0038156 |
| 3851 | GO:0030097 | GO:0044062 | GO:0038155 |
| 3852 | GO:0030072 | GO:0044060 | GO:0038127 |
| 3853 | GO:0030071 | GO:0000451 | GO:0038114 |
| 3854 | GO:0022407 | GO:0044058 | GO:0038111 |
| 3855 | GO:0019961 | GO:0044057 | GO:0038096 |
| 3856 | GO:0018212 | GO:0044033 | GO:0038094 |
| 3857 | GO:0016818 | GO:0043983 | GO:0038044 |
| 3858 | GO:0016684 | GO:0043974 | GO:0036481 |
| 3859 | GO:0016679 | GO:0043970 | GO:0036314 |
| 3860 | GO:0016433 | GO:0043969 | GO:0036297 |
| 3861 | GO:0016428 | GO:0043968 | GO:0036276 |
| 3862 | GO:0016093 | GO:0043967 | GO:0036265 |
| 3863 | GO:0015853 | GO:0043966 | GO:0036260 |
| 3864 | GO:0014068 | GO:0000447 | GO:0036124 |
| 3865 | GO:0014065 | GO:0043933 | GO:0036123 |

|      |            |            |            |
|------|------------|------------|------------|
| 3866 | GO:0014061 | GO:0043932 | GO:0036066 |
| 3867 | GO:0010757 | GO:0043931 | GO:0036065 |
| 3868 | GO:0010720 | GO:0043923 | GO:0035988 |
| 3869 | GO:0010646 | GO:0043921 | GO:0035987 |
| 3870 | GO:0010562 | GO:0043903 | GO:0035966 |
| 3871 | GO:0010535 | GO:0043902 | GO:0035948 |
| 3872 | GO:0010518 | GO:0043901 | GO:0035947 |
| 3873 | GO:0010107 | GO:0043900 | GO:0035927 |
| 3874 | GO:0010035 | GO:0043687 | GO:0035887 |
| 3875 | GO:0009966 | GO:0000398 | GO:0035821 |
| 3876 | GO:0009887 | GO:0043648 | GO:0035815 |
| 3877 | GO:0009719 | GO:0043634 | GO:0035812 |
| 3878 | GO:0009582 | GO:0043633 | GO:0035768 |
| 3879 | GO:0009220 | GO:0043632 | GO:0035767 |
| 3880 | GO:0009190 | GO:0043628 | GO:0035766 |
| 3881 | GO:0009185 | GO:0043627 | GO:0035630 |
| 3882 | GO:0009167 | GO:0043624 | GO:0035601 |
| 3883 | GO:0009165 | GO:0043623 | GO:0035590 |
| 3884 | GO:0009150 | GO:0043618 | GO:0035588 |
| 3885 | GO:0009116 | GO:0043604 | GO:0035567 |
| 3886 | GO:0009019 | GO:0000381 | GO:0035563 |
| 3887 | GO:0008545 | GO:0043603 | GO:0035561 |
| 3888 | GO:0008528 | GO:0043588 | GO:0035491 |
| 3889 | GO:0008401 | GO:0043587 | GO:0035490 |
| 3890 | GO:0008219 | GO:0043574 | GO:0035437 |
| 3891 | GO:0008009 | GO:0043568 | GO:0035412 |
| 3892 | GO:0007548 | GO:0043567 | GO:0035411 |
| 3893 | GO:0007435 | GO:0043549 | GO:0035383 |
| 3894 | GO:0007409 | GO:0043547 | GO:0035337 |
| 3895 | GO:0007399 | GO:0043543 | GO:0035295 |
| 3896 | GO:0007266 | GO:0043491 | GO:0035272 |
| 3897 | GO:0007260 | GO:0000380 | GO:0035270 |
| 3898 | GO:0007202 | GO:0043488 | GO:0035249 |
| 3899 | GO:0007166 | GO:0043487 | GO:0035247 |
| 3900 | GO:0007050 | GO:0043486 | GO:0035246 |
| 3901 | GO:0006982 | GO:0043484 | GO:0035235 |
| 3902 | GO:0006953 | GO:0043461 | GO:0035067 |
| 3903 | GO:0006703 | GO:0043436 | GO:0035065 |
| 3904 | GO:0006554 | GO:0043434 | GO:0035025 |
| 3905 | GO:0006553 | GO:0043433 | GO:0035019 |
| 3906 | GO:0006551 | GO:0043414 | GO:0034983 |
| 3907 | GO:0006259 | GO:0043413 | GO:0034976 |
| 3908 | GO:0006189 | GO:0000377 | GO:0034975 |
| 3909 | GO:0006165 | GO:0043412 | GO:0034968 |
| 3910 | GO:0006140 | GO:0043410 | GO:0034767 |
| 3911 | GO:0006107 | GO:0043408 | GO:0034765 |
| 3912 | GO:0006085 | GO:0043406 | GO:0034764 |
| 3913 | GO:0006027 | GO:0043405 | GO:0034762 |
| 3914 | GO:0005753 | GO:0043401 | GO:0034754 |
| 3915 | GO:0005750 | GO:0043393 | GO:0034728 |
| 3916 | GO:0004809 | GO:0043388 | GO:0034653 |
| 3917 | GO:0004775 | GO:0043297 | GO:0034644 |
| 3918 | GO:0004738 | GO:0043271 | GO:0034629 |

|      |                 |            |            |
|------|-----------------|------------|------------|
| 3919 | GO:0004311      | GO:0000375 | GO:0034622 |
| 3920 | GO:0004310      | GO:0043270 | GO:0034613 |
| 3921 | GO:0004300      | GO:0043269 | GO:0034508 |
| 3922 | GO:0004169      | GO:0043268 | GO:0034502 |
| 3923 | GO:0004152      | GO:0043267 | GO:0034476 |
| 3924 | GO:0003988      | GO:0043266 | GO:0034473 |
| 3925 | GO:0003743      | GO:0043254 | GO:0034472 |
| 3926 | GO:0003690      | GO:0043244 | GO:0034471 |
| 3927 | GO:0002943      | GO:0043243 | GO:0034470 |
| 3928 | GO:0002777      | GO:0043241 | GO:0034462 |
| 3929 | GO:0002775      | GO:0043207 | GO:0034453 |
| 3930 | GO:0002768      | GO:0000302 | GO:0034443 |
| 3931 | GO:0002719      | GO:0043170 | GO:0034442 |
| 3932 | GO:0002696      | GO:0043161 | GO:0043067 |
| 3933 | GO:0002690      | GO:0043152 | GO:0034427 |
| 3934 | GO:0002686      | GO:0043144 | GO:0034329 |
| 3935 | GO:0002548      | GO:0043129 | GO:0034308 |
| 3936 | GO:0002128      | GO:0043114 | GO:0034260 |
| 3937 | GO:0002009      | GO:0043113 | GO:0034250 |
| 3938 | GO:0001934      | GO:0043112 | GO:0034248 |
| 3939 | GO:0001932      | GO:0043103 | GO:0034243 |
| 3940 | GO:0001882      | GO:0043087 | GO:0034116 |
| 3941 | GO:0001784      | GO:0000280 | GO:0034114 |
| 3942 | GO:0001525      | GO:0043086 | GO:0034086 |
| 3943 | GO:0001505      | GO:0043085 | GO:0034067 |
| 3944 | GO:0001503      | GO:0043069 | GO:0033993 |
| 3945 | GO:0001159      | GO:0043068 | GO:0033860 |
| 3946 | GO:0001102      | GO:0043067 | GO:0033753 |
| 3947 | GO:0001101      | GO:0043066 | GO:0033692 |
| 3948 | GO:0000989      | GO:0043065 | GO:0033683 |
| 3949 | GO:0000976      | GO:0043062 | GO:0033627 |
| 3950 | GO:0000963      | GO:0043044 | GO:0033617 |
| 3951 | GO:0000478      | GO:0043043 | GO:0033615 |
| 3952 | GO:0000469      | GO:0000278 | GO:0033559 |
| 3953 | GO:0000314      | GO:0043032 | GO:0033539 |
| 3954 | GO:0000313      | GO:0043009 | GO:0033512 |
| 3955 | GO:0000177      | GO:0042981 | GO:0043410 |
| 3956 | GO:0000027      | GO:0042977 | GO:0033320 |
| 3957 | ENSP00000398698 | GO:0042976 | GO:0033319 |
| 3958 | ENSP00000395772 | GO:0042886 | GO:0033280 |
| 3959 | ENSP00000386134 | GO:0042787 | GO:0033273 |
| 3960 | ENSP00000386047 | GO:0042776 | GO:0033262 |
| 3961 | ENSP00000382392 | GO:0042775 | GO:0033233 |
| 3962 | ENSP00000381655 | GO:0042773 | GO:0033160 |
| 3963 | ENSP00000380033 | GO:0000226 | GO:0033145 |
| 3964 | ENSP00000377385 | GO:0042772 | GO:0033141 |
| 3965 | ENSP00000374399 | GO:0042771 | GO:0033139 |
| 3966 | ENSP00000372695 | GO:0042770 | GO:0033138 |
| 3967 | ENSP00000370589 | GO:0042769 | GO:0033059 |
| 3968 | ENSP00000367029 | GO:0042748 | GO:0033048 |
| 3969 | ENSP00000363746 | GO:0042744 | GO:0033046 |
| 3970 | ENSP00000362873 | GO:0042743 | GO:0033045 |
| 3971 | ENSP00000362649 | GO:0042742 | GO:0033044 |

|      |                 |            |            |
|------|-----------------|------------|------------|
| 3972 | ENSP00000362153 | GO:0042738 | GO:0033036 |
| 3973 | ENSP00000361092 | GO:0042737 | GO:0033014 |
| 3974 | ENSP00000360412 | GO:0000209 | GO:0033013 |
| 3975 | ENSP00000356953 | GO:0042730 | GO:0032970 |
| 3976 | ENSP00000356671 | GO:0042699 | GO:0032965 |
| 3977 | ENSP00000355987 | GO:0042698 | GO:0032964 |
| 3978 | ENSP00000354040 | GO:0042635 | GO:0032963 |
| 3979 | ENSP00000350720 | GO:0042592 | GO:0051347 |
| 3980 | ENSP00000350524 | GO:0042573 | GO:0032956 |
| 3981 | ENSP00000348170 | GO:0042558 | GO:0032945 |
| 3982 | ENSP00000346725 | GO:0042534 | GO:0032944 |
| 3983 | ENSP00000345917 | GO:0042533 | GO:0032940 |
| 3984 | ENSP00000345895 | GO:0042531 | GO:0032926 |
| 3985 | ENSP00000339145 | GO:0000187 | GO:0032925 |
| 3986 | ENSP00000338862 | GO:0042517 | GO:0032905 |
| 3987 | ENSP00000338548 | GO:0042516 | GO:0032881 |
| 3988 | ENSP00000337518 | GO:0042509 | GO:0032880 |
| 3989 | ENSP00000332659 | GO:0042508 | GO:0032870 |
| 3990 | ENSP00000332504 | GO:0042503 | GO:0032845 |
| 3991 | ENSP00000330460 | GO:0042493 | GO:0032844 |
| 3992 | ENSP00000327268 | GO:0042476 | GO:0032803 |
| 3993 | ENSP00000327070 | GO:0042455 | GO:0032787 |
| 3994 | ENSP00000322396 | GO:0042451 | GO:0032784 |
| 3995 | ENSP00000320567 | GO:0042448 | GO:0032682 |
| 3996 | ENSP00000318158 | GO:0000184 | GO:0032675 |
| 3997 | ENSP00000317992 | GO:0042446 | GO:0032652 |
| 3998 | ENSP00000317780 | GO:0042445 | GO:0032640 |
| 3999 | ENSP00000314348 | GO:0042440 | GO:0032635 |
| 4000 | ENSP00000311135 | GO:0042407 | GO:0032620 |
| 4001 | ENSP00000302665 | GO:0042398 | GO:0032612 |
| 4002 | ENSP00000298746 | GO:0042391 | GO:0032571 |
| 4003 | ENSP00000297579 | GO:0042384 | GO:0032543 |
| 4004 | ENSP00000297350 | GO:0042363 | GO:0032535 |
| 4005 | ENSP00000296792 | GO:0042359 | GO:0032508 |
| 4006 | ENSP00000290299 | GO:0042339 | GO:0032507 |
| 4007 | ENSP00000281701 | GO:0000183 | GO:0032504 |
| 4008 | ENSP00000278856 | GO:0042330 | GO:0032481 |
| 4009 | ENSP00000269260 | GO:0042327 | GO:0032480 |
| 4010 | ENSP00000265245 | GO:0042325 | GO:0032456 |
| 4011 | ENSP00000264279 | GO:0042310 | GO:0032409 |
| 4012 | ENSP00000263774 | GO:0042307 | GO:0032402 |
| 4013 | ENSP00000263253 | GO:0042306 | GO:0032401 |
| 4014 | ENSP00000262030 | GO:0042278 | GO:0032370 |
| 4015 | ENSP00000261637 | GO:0042276 | GO:0032355 |
| 4016 | ENSP00000261015 | GO:0042274 | GO:0032310 |
| 4017 | ENSP00000260619 | GO:0042273 | GO:0032273 |
| 4018 | ENSP00000257829 | GO:0000165 | GO:0032268 |
| 4019 | ENSP00000254810 | GO:0042255 | GO:0032226 |
| 4020 | ENSP00000249269 | GO:0042254 | GO:0032225 |
| 4021 | ENSP00000247866 | GO:0042249 | GO:0032206 |
| 4022 | ENSP00000233190 | GO:0042246 | GO:0032205 |
| 4023 | ENSP00000221801 | GO:0042221 | GO:0032200 |
| 4024 | ENSP00000218388 | GO:0042181 | GO:0032148 |

|      |                 |            |            |
|------|-----------------|------------|------------|
| 4025 | ENSP00000199320 | GO:0042176 | GO:0032147 |
| 4026 | hsa05321        | GO:0042168 | GO:0032102 |
| 4027 | hsa04924        | GO:0042161 | GO:0032101 |
| 4028 | hsa04662        | GO:0042160 | GO:0032098 |
| 4029 | hsa00830        | GO:0000154 | GO:0031937 |
| 4030 | GO:2001202      | GO:0042157 | GO:0031667 |
| 4031 | GO:2001201      | GO:0042147 | GO:0031644 |
| 4032 | GO:2000546      | GO:0042130 | GO:0031640 |
| 4033 | GO:2000544      | GO:0042129 | GO:0031638 |
| 4034 | GO:2000147      | GO:0042127 | GO:0031623 |
| 4035 | GO:2000098      | GO:0042113 | GO:0031589 |
| 4036 | GO:2000097      | GO:0042110 | GO:0031584 |
| 4037 | GO:2000002      | GO:0042107 | GO:0031579 |
| 4038 | GO:1990904      | GO:0042104 | GO:0031570 |
| 4039 | GO:1990777      | GO:0042102 | GO:0031529 |
| 4040 | GO:1990583      | GO:0000122 | GO:0031503 |
| 4041 | GO:1990481      | GO:0042098 | GO:0031498 |
| 4042 | GO:1904949      | GO:0042089 | GO:0031440 |
| 4043 | GO:1904894      | GO:0042060 | GO:0031400 |
| 4044 | GO:1904892      | GO:0042059 | GO:0031349 |
| 4045 | GO:1904847      | GO:0042058 | GO:0031348 |
| 4046 | GO:1904667      | GO:0042044 | GO:0031344 |
| 4047 | GO:1904377      | GO:0042036 | GO:0031331 |
| 4048 | GO:1904375      | GO:0042035 | GO:0031324 |
| 4049 | GO:1904237      | GO:0042033 | GO:0031295 |
| 4050 | GO:1903845      | GO:0040029 | GO:0031294 |
| 4051 | GO:1903844      | GO:0000096 | GO:0031281 |
| 4052 | GO:1903751      | GO:0040017 | GO:0031280 |
| 4053 | GO:1903706      | GO:0040013 | GO:0031167 |
| 4054 | GO:1903561      | GO:0040012 | GO:0031145 |
| 4055 | GO:1903557      | GO:0040011 | GO:0031126 |
| 4056 | GO:1903508      | GO:0040008 | GO:0031125 |
| 4057 | GO:1903507      | GO:0040007 | GO:0031124 |
| 4058 | GO:1903337      | GO:0039519 | GO:0031123 |
| 4059 | GO:1903318      | GO:0038166 | GO:0031118 |
| 4060 | GO:1903308      | GO:0038165 | GO:0031062 |
| 4061 | GO:1903279      | GO:0038162 | GO:0031061 |
| 4062 | GO:1903039      | GO:0000086 | GO:0031058 |
| 4063 | GO:1903037      | GO:0038156 | GO:0031057 |
| 4064 | GO:1902996      | GO:0038155 | GO:0031056 |
| 4065 | GO:1902993      | GO:0038127 | GO:0031055 |
| 4066 | GO:1902988      | GO:0038114 | GO:0031023 |
| 4067 | GO:1902949      | GO:0038111 | GO:0030953 |
| 4068 | GO:1902847      | GO:0038096 | GO:0030865 |
| 4069 | GO:1902656      | GO:0038094 | GO:0030855 |
| 4070 | GO:1902653      | GO:0038044 | GO:0030833 |
| 4071 | GO:1902626      | GO:0038043 | GO:0030832 |
| 4072 | GO:1902624      | GO:0036498 | GO:0030823 |
| 4073 | GO:1902593      | GO:0000083 | GO:0030818 |
| 4074 | GO:1902583      | GO:0036481 | GO:0030817 |
| 4075 | GO:1902579      | GO:0036376 | GO:0030802 |
| 4076 | GO:1902572      | GO:0036314 | GO:0030800 |
| 4077 | GO:1902571      | GO:0036297 | GO:0030593 |

|      |            |            |            |
|------|------------|------------|------------|
| 4078 | GO:1902562 | GO:0036276 | GO:0030520 |
| 4079 | GO:1902493 | GO:0036265 | GO:0030518 |
| 4080 | GO:1902403 | GO:0036260 | GO:0030512 |
| 4081 | GO:1902402 | GO:0036211 | GO:0030510 |
| 4082 | GO:1902400 | GO:0036124 | GO:0030509 |
| 4083 | GO:1901675 | GO:0036123 | GO:0030500 |
| 4084 | GO:1901674 | GO:0000082 | GO:0030488 |
| 4085 | GO:1901663 | GO:0036075 | GO:0030449 |
| 4086 | GO:1901568 | GO:0036066 | GO:0030397 |
| 4087 | GO:1901265 | GO:0036065 | GO:0030335 |
| 4088 | GO:1901006 | GO:0035988 | GO:0030334 |
| 4089 | GO:1900864 | GO:0035987 | GO:0030330 |
| 4090 | GO:1900544 | GO:0035966 | GO:0030323 |
| 4091 | GO:1900373 | GO:0035948 | GO:0030321 |
| 4092 | GO:1900372 | GO:0035947 | GO:0030279 |
| 4093 | GO:1900371 | GO:0035929 | GO:0030278 |
| 4094 | GO:1900135 | GO:0035927 | GO:0030258 |
| 4095 | GO:1900133 | GO:0000079 | GO:0030219 |
| 4096 | GO:1900116 | GO:0035914 | GO:0030213 |
| 4097 | GO:1900048 | GO:0035887 | GO:0030201 |
| 4098 | GO:1900047 | GO:0035821 | GO:0030200 |
| 4099 | GO:1900046 | GO:0035815 | GO:0030199 |
| 4100 | GO:0099572 | GO:0035812 | GO:0030198 |
| 4101 | GO:0099537 | GO:0035768 | GO:0030195 |
| 4102 | GO:0099536 | GO:0035767 | GO:0030193 |
| 4103 | GO:0099513 | GO:0035766 | GO:0030183 |
| 4104 | GO:0098852 | GO:0035725 | GO:0030167 |
| 4105 | GO:0098811 | GO:0035637 | GO:0030111 |
| 4106 | GO:0098761 | GO:0000077 | GO:0030104 |
| 4107 | GO:0098760 | GO:0035630 | GO:0030100 |
| 4108 | GO:0098756 | GO:0035601 | GO:0030099 |
| 4109 | GO:0098743 | GO:0035590 | GO:0030098 |
| 4110 | GO:0098732 | GO:0035588 | GO:0030072 |
| 4111 | GO:0097696 | GO:0035587 | GO:0030071 |
| 4112 | GO:0097610 | GO:0035582 | GO:0030041 |
| 4113 | GO:0097485 | GO:0035567 | GO:0030036 |
| 4114 | GO:0097480 | GO:0035563 | GO:0009987 |
| 4115 | GO:0097472 | GO:0035561 | GO:0030031 |
| 4116 | GO:0097034 | GO:0035556 | GO:0030007 |
| 4117 | GO:0097031 | GO:0000076 | GO:0030004 |
| 4118 | GO:0090672 | GO:0035491 | GO:0030002 |
| 4119 | GO:0090671 | GO:0035490 | GO:0030001 |
| 4120 | GO:0090661 | GO:0035437 | GO:0023056 |
| 4121 | GO:0090659 | GO:0035412 | GO:0023052 |
| 4122 | GO:0090545 | GO:0035411 | GO:0023051 |
| 4123 | GO:0090533 | GO:0035384 | GO:0023014 |
| 4124 | GO:0090387 | GO:0035383 | GO:0022904 |
| 4125 | GO:0090316 | GO:0035337 | GO:0022900 |
| 4126 | GO:0090276 | GO:0035295 | GO:0022898 |
| 4127 | GO:0090132 | GO:0035272 | GO:0022618 |
| 4128 | GO:0090035 | GO:0000075 | GO:0022616 |
| 4129 | GO:0080171 | GO:0035270 | GO:0022610 |
| 4130 | GO:0075136 | GO:0035249 | GO:0022607 |

|      |            |            |            |
|------|------------|------------|------------|
| 4131 | GO:0072589 | GO:0035247 | GO:0022603 |
| 4132 | GO:0072536 | GO:0035246 | GO:0022600 |
| 4133 | GO:0072422 | GO:0035235 | GO:0022410 |
| 4134 | GO:0072359 | GO:0035150 | GO:0022409 |
| 4135 | GO:0072350 | GO:0035067 | GO:0022408 |
| 4136 | GO:0071922 | GO:0035065 | GO:0022406 |
| 4137 | GO:0071805 | GO:0035025 | GO:0022402 |
| 4138 | GO:0071773 | GO:0035019 | GO:0022401 |
| 4139 | GO:0071706 | GO:0000070 | GO:0022400 |
| 4140 | GO:0071675 | GO:0034983 | GO:0019932 |
| 4141 | GO:0071634 | GO:0034976 | GO:0019886 |
| 4142 | GO:0071621 | GO:0034975 | GO:0019884 |
| 4143 | GO:0071616 | GO:0034968 | GO:0019827 |
| 4144 | GO:0071593 | GO:0034767 | GO:0019752 |
| 4145 | GO:0071466 | GO:0034766 | GO:0019730 |
| 4146 | GO:0071436 | GO:0034765 | GO:0019722 |
| 4147 | GO:0071431 | GO:0034764 | GO:0019693 |
| 4148 | GO:0071427 | GO:0034762 | GO:0019674 |
| 4149 | GO:0071385 | GO:0034754 | GO:0019673 |
| 4150 | GO:0071339 | GO:0000060 | GO:0019637 |
| 4151 | GO:0071174 | GO:0034728 | GO:0019538 |
| 4152 | GO:0071051 | GO:0034724 | GO:0019477 |
| 4153 | GO:0071049 | GO:0034723 | GO:0019474 |
| 4154 | GO:0071046 | GO:0034661 | GO:0019439 |
| 4155 | GO:0071043 | GO:0034660 | GO:0019369 |
| 4156 | GO:0071038 | GO:0034655 | GO:0019362 |
| 4157 | GO:0071035 | GO:0034654 | GO:0019320 |
| 4158 | GO:0071034 | GO:0034653 | GO:0019228 |
| 4159 | GO:0071029 | GO:0034645 | GO:0019220 |
| 4160 | GO:0071028 | GO:0034644 | GO:0019218 |
| 4161 | GO:0071025 | GO:0000055 | GO:0018394 |
| 4162 | GO:0070901 | GO:0034641 | GO:0018393 |
| 4163 | GO:0070846 | GO:0034629 | GO:0018279 |
| 4164 | GO:0070727 | GO:0034622 | GO:0018214 |
| 4165 | GO:0070489 | GO:0034613 | GO:0018200 |
| 4166 | GO:0070486 | GO:0034508 | GO:0018198 |
| 4167 | GO:0070272 | GO:0034502 | GO:0018171 |
| 4168 | GO:0070271 | GO:0034476 | GO:0018076 |
| 4169 | GO:0070169 | GO:0034475 | GO:0018027 |
| 4170 | GO:0070142 | GO:0034473 | GO:0018023 |
| 4171 | GO:0070119 | GO:0034472 | GO:0018022 |
| 4172 | GO:0070076 | GO:0000054 | GO:0017187 |
| 4173 | GO:0070062 | GO:0034471 | GO:0017157 |
| 4174 | GO:0070035 | GO:0034470 | GO:0017144 |
| 4175 | GO:0061732 | GO:0034462 | GO:0017015 |
| 4176 | GO:0061718 | GO:0034453 | GO:0017004 |
| 4177 | GO:0061641 | GO:0034446 | GO:0016578 |
| 4178 | GO:0061621 | GO:0034443 | GO:0016575 |
| 4179 | GO:0061620 | GO:0034442 | GO:0016573 |
| 4180 | GO:0061615 | GO:0034440 | GO:0016571 |
| 4181 | GO:0061564 | GO:0034427 | GO:0016570 |
| 4182 | GO:0061518 | GO:0034332 | GO:0016568 |
| 4183 | GO:0061458 | GO:0000045 | GO:0016567 |

|      |            |            |            |
|------|------------|------------|------------|
| 4184 | GO:0061302 | GO:0034330 | GO:0016525 |
| 4185 | GO:0061078 | GO:0034329 | GO:0016477 |
| 4186 | GO:0061044 | GO:0034308 | GO:0016358 |
| 4187 | GO:0061034 | GO:0034260 | GO:0016311 |
| 4188 | GO:0060669 | GO:0034250 | GO:0016266 |
| 4189 | GO:0060665 | GO:0034248 | GO:0016241 |
| 4190 | GO:0060591 | GO:0034243 | GO:0016236 |
| 4191 | GO:0060311 | GO:0034220 | GO:0016180 |
| 4192 | GO:0060310 | GO:0034116 | GO:0016125 |
| 4193 | GO:0060158 | GO:0034114 | GO:0016093 |
| 4194 | GO:0060135 | GO:0000028 | GO:0016078 |
| 4195 | GO:0060089 | GO:0034113 | GO:0016075 |
| 4196 | GO:0055029 | GO:0034112 | GO:0016074 |
| 4197 | GO:0052909 | GO:0034110 | GO:0016073 |
| 4198 | GO:0052547 | GO:0034109 | GO:0016071 |
| 4199 | GO:0052472 | GO:0034104 | GO:0016053 |
| 4200 | GO:0052192 | GO:0034103 | GO:0016052 |
| 4201 | GO:0052126 | GO:0034097 | GO:0016049 |
| 4202 | GO:0051996 | GO:0034086 | GO:0015991 |
| 4203 | GO:0051985 | GO:0034080 | GO:0015988 |
| 4204 | GO:0051931 | GO:0034067 | GO:0015980 |
| 4205 | GO:0051828 | GO:0000027 | GO:0015959 |
| 4206 | GO:0051806 | GO:0033993 | GO:0015931 |
| 4207 | GO:0051783 | GO:0033860 | GO:0015874 |
| 4208 | GO:0051707 | GO:0033753 | GO:0015853 |
| 4209 | GO:0051674 | GO:0033750 | GO:0015851 |
| 4210 | GO:0051574 | GO:0033692 | GO:0015850 |
| 4211 | GO:0051549 | GO:0033688 | GO:0015844 |
| 4212 | GO:0051546 | GO:0033683 | GO:0015837 |
| 4213 | GO:0051540 | GO:0033674 | GO:0015833 |
| 4214 | GO:0051538 | GO:0033631 | GO:0015721 |
| 4215 | GO:0051303 | GO:0033627 | GO:0015718 |
| 4216 | GO:0051283 | GO:0000018 | GO:0015711 |
| 4217 | GO:0051192 | GO:0033619 | GO:0015031 |
| 4218 | GO:0051081 | GO:0033617 | GO:0014912 |
| 4219 | GO:0051043 | GO:0033615 | GO:0014911 |
| 4220 | GO:0050965 | GO:0033591 | GO:0014848 |
| 4221 | GO:0050867 | GO:0033559 | GO:0014823 |
| 4222 | GO:0050863 | GO:0033554 | GO:0014821 |
| 4223 | GO:0050819 | GO:0033539 | GO:0014812 |
| 4224 | GO:0050818 | GO:0033512 | GO:0014070 |
| 4225 | GO:0050812 | GO:0033365 | GO:0014066 |
| 4226 | GO:0050796 | GO:0033320 | GO:0014047 |
| 4227 | GO:0050755 | GO:0000003 | GO:0014012 |
| 4228 | GO:0050670 | GO:0033319 | GO:0012501 |
| 4229 | GO:0050663 | GO:0033280 | GO:0010992 |
| 4230 | GO:0050658 | GO:0033273 | GO:0010972 |
| 4231 | GO:0050178 | GO:0033262 | GO:0010971 |
| 4232 | GO:0050136 | GO:0033260 | GO:0010955 |
| 4233 | GO:0048770 | GO:0033233 | GO:0010948 |
| 4234 | GO:0048731 | GO:0033198 | GO:0010876 |
| 4235 | GO:0048729 | GO:0033160 | GO:0010870 |
| 4236 | GO:0048699 | GO:0033158 | GO:0010835 |



|      |            |            |            |
|------|------------|------------|------------|
| 4237 | GO:0048608 | GO:0033148 | GO:0010828 |
| 4238 | GO:0048584 | GO:0033145 | GO:0010817 |
| 4239 | GO:0048551 | GO:0033143 | GO:0010812 |
| 4240 | GO:0048263 | GO:0033141 | GO:0010811 |
| 4241 | GO:0048041 | GO:0033139 | GO:0010810 |
| 4242 | GO:0048040 | GO:0033138 | GO:0010757 |
| 4243 | GO:0047696 | GO:0033135 | GO:0010739 |
| 4244 | GO:0046824 | GO:0033108 | GO:0010716 |
| 4245 | GO:0046546 | GO:0033059 | GO:0010715 |
| 4246 | GO:0046496 | GO:0033048 | GO:0010712 |
| 4247 | GO:0046483 | GO:0033047 | GO:0010711 |
| 4248 | GO:0046440 | GO:0033046 | GO:0010647 |
| 4249 | GO:0046395 | GO:0033045 | GO:0010646 |
| 4250 | GO:0046394 | GO:0033044 | GO:0010644 |
| 4251 | GO:0046160 | GO:0033043 | GO:0010639 |
| 4252 | GO:0046132 | GO:0033036 | GO:0010638 |
| 4253 | GO:0046129 | GO:0033014 | GO:0010634 |
| 4254 | GO:0046103 | GO:0033013 | GO:0010633 |
| 4255 | GO:0046049 | GO:0033002 | GO:0010629 |
| 4256 | GO:0046031 | GO:0032990 | GO:0010608 |
| 4257 | GO:0045937 | GO:0032989 | GO:0010596 |
| 4258 | GO:0045903 | GO:0032986 | GO:0010573 |
| 4259 | GO:0045859 | GO:0032984 | GO:0010564 |
| 4260 | GO:0045662 | GO:0032981 | GO:0010544 |
| 4261 | GO:0045621 | GO:0032970 | GO:0010543 |
| 4262 | GO:0045283 | GO:0032967 | GO:0010536 |
| 4263 | GO:0045281 | GO:0032965 | GO:0010535 |
| 4264 | GO:0045275 | GO:0032964 | GO:0010534 |
| 4265 | GO:0045273 | GO:0032963 | GO:0010533 |
| 4266 | GO:0045271 | GO:0032956 | GO:0010517 |
| 4267 | GO:0045267 | GO:0032946 | GO:0010453 |
| 4268 | GO:0045261 | GO:0032945 | GO:0010248 |
| 4269 | GO:0045257 | GO:0032944 | GO:0010243 |
| 4270 | GO:0045240 | GO:0032943 | GO:0009966 |
| 4271 | GO:0045239 | GO:0032940 | GO:0009896 |
| 4272 | GO:0045047 | GO:0032926 | GO:0009894 |
| 4273 | GO:0044783 | GO:0032925 | GO:0009892 |
| 4274 | GO:0044700 | GO:0032922 | GO:0009746 |
| 4275 | GO:0044620 | GO:0032908 | GO:0009725 |
| 4276 | GO:0044439 | GO:0032905 | GO:0009719 |
| 4277 | GO:0044419 | GO:0032881 | GO:0009611 |
| 4278 | GO:0044409 | GO:0032880 | GO:0009607 |
| 4279 | GO:0044403 | GO:0032879 | GO:0009605 |
| 4280 | GO:0044391 | GO:0032870 | GO:0009584 |
| 4281 | GO:0044364 | GO:0032869 | GO:0009583 |
| 4282 | GO:0044253 | GO:0032845 | GO:0009581 |
| 4283 | GO:0044246 | GO:0032844 | GO:0009452 |
| 4284 | GO:0044212 | GO:0032803 | GO:0009404 |
| 4285 | GO:0044057 | GO:0032802 | GO:0009396 |
| 4286 | GO:0043783 | GO:0032787 | GO:0009306 |
| 4287 | GO:0043634 | GO:0032786 | GO:0009268 |
| 4288 | GO:0043544 | hsa05204   | GO:0009260 |
| 4289 | GO:0043413 | GO:0032784 | GO:0009259 |

|      |            |            |            |
|------|------------|------------|------------|
| 4290 | GO:0043232 | GO:0032774 | GO:0009247 |
| 4291 | GO:0043189 | GO:0032755 | GO:0009226 |
| 4292 | GO:0043144 | GO:0032722 | GO:0009225 |
| 4293 | GO:0043062 | GO:0032689 | GO:0009220 |
| 4294 | GO:0043009 | GO:0032682 | GO:0009218 |
| 4295 | GO:0042827 | GO:0032680 | GO:0009206 |
| 4296 | GO:0042775 | GO:0032675 | GO:0009199 |
| 4297 | GO:0042730 | GO:0032652 | GO:0009187 |
| 4298 | GO:0042645 | GO:0032642 | GO:0009185 |
| 4299 | GO:0042625 | GO:0032640 | GO:0009179 |
| 4300 | GO:0042579 | GO:0032637 | GO:0009174 |
| 4301 | GO:0042567 | GO:0032635 | GO:0009173 |
| 4302 | GO:0042534 | GO:0032620 | GO:0009156 |
| 4303 | GO:0042531 | GO:0032612 | GO:0009152 |
| 4304 | GO:0042493 | GO:0032606 | GO:0009145 |
| 4305 | GO:0042363 | GO:0032602 | GO:0009144 |
| 4306 | GO:0042330 | GO:0032571 | GO:0009142 |
| 4307 | GO:0042325 | GO:0032543 | GO:0009141 |
| 4308 | GO:0042161 | GO:0032535 | GO:0009135 |
| 4309 | GO:0042044 | hsa05202   | GO:0009127 |
| 4310 | GO:0042035 | GO:0032508 | GO:0009126 |
| 4311 | GO:0042020 | GO:0032507 | GO:0009123 |
| 4312 | GO:0042019 | GO:0032504 | GO:0009119 |
| 4313 | GO:0038156 | GO:0032502 | GO:0009117 |
| 4314 | GO:0038155 | GO:0032501 | GO:0009116 |
| 4315 | GO:0038127 | GO:0032496 | GO:0009113 |
| 4316 | GO:0038114 | GO:0032481 | GO:0009108 |
| 4317 | GO:0038096 | GO:0032480 | GO:0009100 |
| 4318 | GO:0036454 | GO:0032479 | GO:0009083 |
| 4319 | GO:0036440 | GO:0032467 | GO:0009070 |
| 4320 | GO:0036376 | GO:0032465 | GO:0009069 |
| 4321 | GO:0036260 | GO:0032456 | GO:0009068 |
| 4322 | GO:0036211 | GO:0032446 | GO:0009065 |
| 4323 | GO:0036123 | GO:0032436 | GO:0008344 |
| 4324 | GO:0036075 | GO:0032435 | GO:0008334 |
| 4325 | GO:0035768 | GO:0032434 | GO:0008300 |
| 4326 | GO:0035639 | GO:0032413 | GO:0008285 |
| 4327 | GO:0035491 | GO:0032412 | GO:0008217 |
| 4328 | GO:0035383 | GO:0032409 | GO:0008211 |
| 4329 | GO:0035247 | GO:0032402 | GO:0008210 |
| 4330 | GO:0035065 | GO:0032401 | GO:0008209 |
| 4331 | GO:0034979 | GO:0032392 | GO:0008206 |
| 4332 | GO:0034724 | GO:0032388 | GO:0008203 |
| 4333 | GO:0034723 | GO:0032386 | GO:0008202 |
| 4334 | GO:0034653 | GO:0032370 | GO:0008154 |
| 4335 | GO:0034604 | GO:0032355 | GO:0008150 |
| 4336 | GO:0034513 | GO:0032310 | GO:0008105 |
| 4337 | GO:0034476 | GO:0032273 | GO:0008033 |
| 4338 | GO:0034475 | GO:0032271 | GO:0008015 |
| 4339 | GO:0034473 | GO:0032270 | GO:0007635 |
| 4340 | GO:0034471 | GO:0032269 | GO:0007632 |
| 4341 | GO:0034457 | GO:0032268 | GO:0007631 |
| 4342 | GO:0034456 | GO:0032259 | GO:0007628 |

|      |            |            |            |
|------|------------|------------|------------|
| 4343 | GO:0034455 | GO:0032226 | GO:0007603 |
| 4344 | GO:0034110 | GO:0032225 | GO:0007602 |
| 4345 | GO:0033764 | GO:0032206 | GO:0007597 |
| 4346 | GO:0033753 | GO:0032205 | GO:0007586 |
| 4347 | GO:0033750 | GO:0032204 | GO:0007571 |
| 4348 | GO:0033558 | GO:0032200 | GO:0007565 |
| 4349 | GO:0033512 | GO:0032148 | GO:0007507 |
| 4350 | GO:0033320 | hsa05166   | GO:0007431 |
| 4351 | GO:0033202 | GO:0032147 | GO:0007411 |
| 4352 | GO:0033186 | GO:0032103 | GO:0007409 |
| 4353 | GO:0033141 | GO:0032102 | GO:0007369 |
| 4354 | GO:0033002 | GO:0032101 | GO:0007289 |
| 4355 | GO:0032986 | GO:0032098 | GO:0007269 |
| 4356 | GO:0032981 | GO:0031960 | GO:0007268 |
| 4357 | GO:0032944 | GO:0031937 | GO:0007267 |
| 4358 | GO:0032908 | GO:0031935 | GO:0007229 |
| 4359 | GO:0032905 | GO:0031667 | GO:0007220 |
| 4360 | GO:0032869 | GO:0031644 | GO:0007219 |
| 4361 | GO:0032803 | hsa05160   | GO:0007218 |
| 4362 | GO:0032652 | GO:0031640 | GO:0007215 |
| 4363 | GO:0032635 | GO:0031639 | GO:0007212 |
| 4364 | GO:0032561 | GO:0031638 | GO:0007210 |
| 4365 | GO:0032550 | GO:0031623 | GO:0007205 |
| 4366 | GO:0032545 | GO:0031589 | GO:0007204 |
| 4367 | GO:0032386 | GO:0031584 | GO:0007202 |
| 4368 | GO:0032268 | GO:0031579 | GO:0007200 |
| 4369 | GO:0032155 | GO:0031577 | GO:0007193 |
| 4370 | GO:0032041 | GO:0031573 | GO:0007191 |
| 4371 | GO:0031907 | GO:0031572 | GO:0007190 |
| 4372 | GO:0031903 | GO:0031571 | GO:0007188 |
| 4373 | GO:0031762 | GO:0031570 | GO:0007187 |
| 4374 | GO:0031644 | GO:0031529 | GO:0007179 |
| 4375 | GO:0031515 | GO:0031503 | GO:0007178 |
| 4376 | GO:0031328 | GO:0031498 | GO:0007173 |
| 4377 | GO:0031305 | GO:0031497 | GO:0007169 |
| 4378 | GO:0031231 | GO:0031442 | GO:0007164 |
| 4379 | GO:0031118 | GO:0031440 | GO:0007163 |
| 4380 | GO:0030964 | GO:0031401 | GO:0007131 |
| 4381 | GO:0030799 | GO:0031400 | GO:0007127 |
| 4382 | GO:0030731 | GO:0031399 | GO:0007098 |
| 4383 | GO:0030697 | GO:0031398 | GO:0007091 |
| 4384 | GO:0030696 | GO:0031397 | GO:0007088 |
| 4385 | GO:0030692 | GO:0031396 | GO:0007064 |
| 4386 | GO:0030320 | GO:0031349 | GO:0007063 |
| 4387 | GO:0030182 | GO:0031348 | GO:0007062 |
| 4388 | GO:0030098 | GO:0031347 | GO:0007051 |
| 4389 | GO:0030007 | GO:0031346 | GO:0007045 |
| 4390 | GO:0023014 | GO:0031344 | GO:0007044 |
| 4391 | GO:0022834 | GO:0031333 | GO:0007041 |
| 4392 | GO:0022832 | GO:0031331 | GO:0007040 |
| 4393 | GO:0022803 | GO:0031329 | GO:0007034 |
| 4394 | GO:0022401 | GO:0031328 | GO:0007033 |
| 4395 | GO:0019981 | GO:0031327 | GO:0007032 |

|      |            |            |            |
|------|------------|------------|------------|
| 4396 | GO:0019969 | GO:0031326 | GO:0007031 |
| 4397 | GO:0019962 | GO:0031325 | GO:0007017 |
| 4398 | GO:0019477 | GO:0031324 | GO:0007015 |
| 4399 | GO:0019474 | GO:0031323 | GO:0007009 |
| 4400 | GO:0018685 | GO:0031295 | GO:0007007 |
| 4401 | GO:0018214 | GO:0031294 | GO:0007000 |
| 4402 | GO:0017187 | GO:0031281 | GO:0006999 |
| 4403 | GO:0017076 | GO:0031280 | GO:0006998 |
| 4404 | GO:0016907 | GO:0031279 | GO:0006996 |
| 4405 | GO:0016885 | GO:0031214 | GO:0006982 |
| 4406 | GO:0016875 | GO:0031175 | GO:0006978 |
| 4407 | GO:0016751 | GO:0031167 | GO:0006963 |
| 4408 | GO:0016681 | GO:0031145 | GO:0006959 |
| 4409 | GO:0016676 | GO:0031126 | GO:0006958 |
| 4410 | GO:0016649 | GO:0031125 | GO:0006956 |
| 4411 | GO:0016577 | GO:0031124 | GO:0006953 |
| 4412 | GO:0016509 | GO:0031123 | GO:0006939 |
| 4413 | GO:0016436 | GO:0031122 | GO:0006937 |
| 4414 | GO:0016429 | GO:0031118 | GO:0006936 |
| 4415 | GO:0016426 | GO:0031100 | GO:0006935 |
| 4416 | GO:0016279 | GO:0031099 | GO:0006933 |
| 4417 | GO:0016274 | GO:0031062 | GO:0006931 |
| 4418 | GO:0016273 | GO:0031061 | GO:0006915 |
| 4419 | GO:0016265 | GO:0031060 | GO:0006913 |
| 4420 | GO:0016180 | GO:0031058 | GO:0006904 |
| 4421 | GO:0016150 | GO:0031057 | GO:0006900 |
| 4422 | GO:0016126 | GO:0031056 | GO:0006898 |
| 4423 | GO:0016103 | GO:0031055 | GO:0006892 |
| 4424 | GO:0016078 | GO:0031047 | GO:0006883 |
| 4425 | GO:0016049 | GO:0031023 | GO:0006875 |
| 4426 | GO:0015991 | GO:0030968 | GO:0006874 |
| 4427 | GO:0015986 | GO:0030953 | GO:0006869 |
| 4428 | GO:0015405 | GO:0030947 | GO:0006865 |
| 4429 | GO:0015002 | GO:0030913 | GO:0006857 |
| 4430 | GO:0014910 | GO:0030866 | GO:0006839 |
| 4431 | GO:0012501 | GO:0030865 | GO:0006836 |
| 4432 | GO:0010941 | GO:0030855 | GO:0006835 |
| 4433 | GO:0010712 | GO:0030838 | GO:0006833 |
| 4434 | GO:0010648 | GO:0030833 | GO:0006820 |
| 4435 | GO:0010574 | GO:0030832 | GO:0006818 |
| 4436 | GO:0010536 | GO:0030823 | GO:0006812 |
| 4437 | GO:0009982 | GO:0030818 | GO:0006811 |
| 4438 | GO:0009968 | GO:0030817 | GO:0006796 |
| 4439 | GO:0009914 | GO:0030816 | GO:0006784 |
| 4440 | GO:0009179 | GO:0030815 | GO:0006781 |
| 4441 | GO:0009174 | GO:0030814 | GO:0006767 |
| 4442 | GO:0009173 | GO:0030810 | GO:0006757 |
| 4443 | GO:0009168 | GO:0030809 | GO:0006744 |
| 4444 | GO:0009161 | GO:0030808 | GO:0006739 |
| 4445 | GO:0009113 | GO:0030804 | GO:0006735 |
| 4446 | GO:0009059 | GO:0030803 | GO:0006734 |
| 4447 | GO:0008988 | GO:0030802 | GO:0006733 |
| 4448 | GO:0008650 | GO:0030801 | GO:0006732 |

|      |            |            |            |
|------|------------|------------|------------|
| 4449 | GO:0008556 | GO:0030800 | GO:0006721 |
| 4450 | GO:0008495 | GO:0030799 | GO:0006706 |
| 4451 | GO:0008300 | GO:0030728 | GO:0006705 |
| 4452 | GO:0008213 | hsa05100   | GO:0006701 |
| 4453 | GO:0008186 | GO:0030705 | GO:0006699 |
| 4454 | GO:0008137 | GO:0030595 | GO:0006695 |
| 4455 | GO:0007599 | GO:0030593 | GO:0006694 |
| 4456 | GO:0007596 | GO:0030574 | GO:0006690 |
| 4457 | GO:0007571 | GO:0030538 | GO:0006664 |
| 4458 | GO:0006965 | GO:0030534 | GO:0006635 |
| 4459 | GO:0006963 | GO:0030522 | GO:0006631 |
| 4460 | GO:0006784 | GO:0030521 | GO:0006629 |
| 4461 | GO:0006753 | GO:0030520 | GO:0006626 |
| 4462 | GO:0006613 | GO:0030518 | GO:0006621 |
| 4463 | GO:0006490 | GO:0030514 | GO:0006605 |
| 4464 | GO:0006306 | GO:0030513 | GO:0006595 |
| 4465 | GO:0006171 | GO:0030512 | GO:0006554 |
| 4466 | GO:0006086 | GO:0030510 | GO:0006544 |
| 4467 | GO:0005900 | GO:0030509 | GO:0006520 |
| 4468 | GO:0005764 | GO:0030502 | GO:0006518 |
| 4469 | GO:0005763 | GO:0030501 | GO:0006516 |
| 4470 | GO:0005762 | GO:0030500 | GO:0006513 |
| 4471 | GO:0005761 | GO:0030490 | GO:0006511 |
| 4472 | GO:0005754 | GO:0030488 | GO:0006509 |
| 4473 | GO:0005666 | hsa05032   | GO:0006493 |
| 4474 | GO:0005664 | GO:0030449 | GO:0006490 |
| 4475 | GO:0005391 | GO:0030397 | GO:0006488 |
| 4476 | GO:0004993 | GO:0030336 | GO:0006487 |
| 4477 | GO:0004984 | GO:0030335 | GO:0006486 |
| 4478 | GO:0004917 | GO:0030334 | GO:0006476 |
| 4479 | GO:0004915 | GO:0030330 | GO:0006473 |
| 4480 | GO:0004914 | GO:0030324 | GO:0006465 |
| 4481 | GO:0004912 | GO:0030323 | GO:0006464 |
| 4482 | GO:0004905 | GO:0030321 | GO:0006417 |
| 4483 | GO:0004904 | GO:0030320 | GO:0006415 |
| 4484 | GO:0004897 | GO:0030301 | GO:0006414 |
| 4485 | GO:0004776 | GO:0030282 | GO:0006413 |
| 4486 | GO:0004774 | GO:0030279 | GO:0006412 |
| 4487 | GO:0004532 | GO:0030278 | GO:0006406 |
| 4488 | GO:0004385 | GO:0030260 | GO:0006405 |
| 4489 | GO:0004174 | GO:0030258 | GO:0006401 |
| 4490 | GO:0004149 | GO:0030219 | GO:0006400 |
| 4491 | GO:0003963 | GO:0030217 | GO:0006391 |
| 4492 | GO:0003700 | GO:0030213 | GO:0006390 |
| 4493 | GO:0002816 | GO:0030212 | GO:0006369 |
| 4494 | GO:0002815 | GO:0030204 | GO:0006367 |
| 4495 | GO:0002807 | GO:0030203 | GO:0006362 |
| 4496 | GO:0002803 | GO:0030201 | GO:0006361 |
| 4497 | GO:0002786 | GO:0030200 | GO:0006360 |
| 4498 | GO:0002784 | GO:0030199 | GO:0006354 |
| 4499 | GO:0002780 | GO:0030198 | GO:0006352 |
| 4500 | GO:0002778 | GO:0030195 | GO:0006342 |
| 4501 | GO:0002760 | GO:0030194 | GO:0006334 |

|      |                 |            |            |
|------|-----------------|------------|------------|
| 4502 | GO:0002739      | GO:0030193 | GO:0006333 |
| 4503 | GO:0002718      | GO:0030183 | GO:0006310 |
| 4504 | GO:0002639      | GO:0030182 | GO:0006301 |
| 4505 | GO:0002374      | GO:0030168 | GO:0006297 |
| 4506 | GO:0001999      | GO:0030167 | GO:0043393 |
| 4507 | GO:0001869      | GO:0030166 | GO:0006284 |
| 4508 | GO:0001731      | GO:0030163 | GO:0006282 |
| 4509 | GO:0001568      | GO:0030162 | GO:0006271 |
| 4510 | GO:0001532      | GO:0030155 | GO:0006270 |
| 4511 | GO:0001189      | GO:0030154 | GO:0006261 |
| 4512 | GO:0001188      | GO:0030150 | GO:0006259 |
| 4513 | GO:0001180      | GO:0030111 | GO:0006222 |
| 4514 | GO:0001099      | GO:0030104 | GO:0006189 |
| 4515 | GO:0001054      | GO:0030100 | GO:0006188 |
| 4516 | GO:0001012      | GO:0030099 | GO:0006177 |
| 4517 | GO:0000987      | GO:0030098 | GO:0006167 |
| 4518 | GO:0000967      | GO:0030097 | GO:0006165 |
| 4519 | GO:0000902      | GO:0030073 | GO:0006152 |
| 4520 | GO:0000725      | GO:0030072 | GO:0006144 |
| 4521 | GO:0000480      | GO:0030071 | GO:0006123 |
| 4522 | GO:0000479      | GO:0030041 | GO:0006122 |
| 4523 | GO:0000472      | GO:0030036 | GO:0006120 |
| 4524 | GO:0000467      | hsa04974   | GO:0006107 |
| 4525 | GO:0000453      | GO:0030031 | GO:0006106 |
| 4526 | GO:0000398      | GO:0030030 | GO:0006105 |
| 4527 | GO:0000176      | GO:0030029 | GO:0006104 |
| 4528 | GO:0000125      | GO:0030010 | GO:0006103 |
| 4529 | GO:0000104      | GO:0030007 | GO:0006101 |
| 4530 | GO:0000036      | GO:0030004 | GO:0006099 |
| 4531 | GO:0000018      | GO:0030003 | GO:0006091 |
| 4532 | ENSP00000419740 | GO:0030002 | GO:0006090 |
| 4533 | ENSP00000417464 | GO:0030001 | GO:0006085 |
| 4534 | ENSP00000414514 | GO:0023061 | GO:0006082 |
| 4535 | ENSP00000413572 | GO:0023058 | GO:0006081 |
| 4536 | ENSP00000412483 | GO:0023057 | GO:0006027 |
| 4537 | ENSP00000412251 | GO:0023056 | GO:0006024 |
| 4538 | ENSP00000411162 | GO:0023052 | GO:0006022 |
| 4539 | ENSP00000410530 | GO:0023051 | GO:0006007 |
| 4540 | ENSP00000409384 | GO:0023014 | GO:0005996 |
| 4541 | ENSP00000409367 | GO:0022904 | GO:0005975 |
| 4542 | ENSP00000409074 | GO:0022900 | GO:0003417 |
| 4543 | ENSP00000408017 | GO:0022898 | GO:0003416 |
| 4544 | ENSP00000407515 | GO:0022618 | GO:0003094 |
| 4545 | ENSP00000407436 | hsa04972   | GO:0003073 |
| 4546 | ENSP00000405614 | GO:0022617 | GO:0003071 |
| 4547 | ENSP00000404102 | GO:0022616 | GO:0003069 |
| 4548 | ENSP00000403576 | GO:0022613 | GO:0003044 |
| 4549 | ENSP00000402869 | GO:0022610 | GO:0003018 |
| 4550 | ENSP00000402802 | GO:0022607 | GO:0003014 |
| 4551 | ENSP00000402733 | GO:0022604 | GO:0003013 |
| 4552 | ENSP00000402338 | GO:0022603 | GO:0002940 |
| 4553 | ENSP00000399753 | GO:0022602 | GO:0002923 |
| 4554 | ENSP00000399454 | GO:0022600 | GO:0002922 |

|      |                 |            |            |
|------|-----------------|------------|------------|
| 4555 | ENSP00000399078 | GO:0022414 | GO:0002920 |
| 4556 | ENSP00000396454 | hsa04971   | GO:0002862 |
| 4557 | ENSP00000396441 | GO:0022411 | GO:0002833 |
| 4558 | ENSP00000395187 | GO:0022410 | GO:0002831 |
| 4559 | ENSP00000394290 | GO:0022409 | GO:0002816 |
| 4560 | ENSP00000393101 | GO:0022408 | GO:0002805 |
| 4561 | ENSP00000389649 | GO:0022407 | GO:0002803 |
| 4562 | ENSP00000387523 | GO:0022406 | GO:0002791 |
| 4563 | ENSP00000384316 | GO:0022402 | GO:0002790 |
| 4564 | ENSP00000384302 | GO:0022401 | GO:0002780 |
| 4565 | ENSP00000380982 | GO:0022400 | GO:0002779 |
| 4566 | ENSP00000380495 | GO:0022008 | GO:0002778 |
| 4567 | ENSP00000380153 | GO:0022007 | GO:0002777 |
| 4568 | ENSP00000379760 | GO:0021545 | GO:0002775 |
| 4569 | ENSP00000378857 | GO:0019985 | GO:0002768 |
| 4570 | ENSP00000377799 | GO:0019953 | GO:0002764 |
| 4571 | ENSP00000377523 | GO:0019941 | GO:0002759 |
| 4572 | ENSP00000374390 | GO:0019932 | GO:0002718 |
| 4573 | ENSP00000373090 | GO:0019886 | GO:0002696 |
| 4574 | ENSP00000372199 | GO:0019884 | GO:0002694 |
| 4575 | ENSP00000371377 | GO:0019882 | GO:0002686 |
| 4576 | ENSP00000371169 | GO:0019856 | GO:0002685 |
| 4577 | ENSP00000371101 | GO:0019852 | GO:0002639 |
| 4578 | ENSP00000370473 | GO:0019827 | GO:0002576 |
| 4579 | ENSP00000369728 | GO:0019752 | GO:0002526 |
| 4580 | ENSP00000368989 | GO:0019731 | GO:0002520 |
| 4581 | ENSP00000368887 | GO:0019730 | GO:0002504 |
| 4582 | ENSP00000367934 | GO:0019725 | GO:0002495 |
| 4583 | ENSP00000367361 | GO:0019724 | GO:0002479 |
| 4584 | ENSP00000366629 | GO:0019722 | GO:0002478 |
| 4585 | ENSP00000366623 | GO:0019693 | GO:0002474 |
| 4586 | ENSP00000366519 | GO:0019682 | GO:0002455 |
| 4587 | ENSP00000365837 | hsa04961   | GO:0002449 |
| 4588 | ENSP00000365806 | GO:0019674 | GO:0002446 |
| 4589 | ENSP00000364699 | GO:0019673 | GO:0002431 |
| 4590 | ENSP00000364649 | GO:0019637 | GO:0002385 |
| 4591 | ENSP00000364320 | GO:0019538 | GO:0002384 |
| 4592 | ENSP00000364037 | GO:0019477 | GO:0002377 |
| 4593 | ENSP00000363642 | GO:0019474 | GO:0002374 |
| 4594 | ENSP00000362687 | GO:0019439 | GO:0002367 |
| 4595 | ENSP00000362036 | GO:0019438 | GO:0002244 |
| 4596 | ENSP00000361232 | GO:0019395 | GO:0002227 |
| 4597 | ENSP00000361084 | GO:0019369 | GO:0002225 |
| 4598 | ENSP00000361010 | GO:0019362 | GO:0002223 |
| 4599 | ENSP00000360492 | GO:0019320 | GO:0002128 |
| 4600 | ENSP00000360329 | GO:0019318 | GO:0002090 |
| 4601 | ENSP00000360031 | GO:0019233 | GO:0002063 |
| 4602 | ENSP00000359688 | GO:0019229 | GO:0002062 |
| 4603 | ENSP00000358737 | GO:0019228 | GO:0002032 |
| 4604 | ENSP00000357748 | GO:0019226 | GO:0002031 |
| 4605 | ENSP00000357134 | GO:0019222 | GO:0002002 |
| 4606 | ENSP00000356972 | GO:0019221 | GO:0001999 |
| 4607 | ENSP00000356548 | GO:0019220 | GO:0001991 |

|      |                 |            |            |
|------|-----------------|------------|------------|
| 4608 | ENSP00000356476 | GO:0019219 | GO:0001990 |
| 4609 | ENSP00000355899 | GO:0019218 | GO:0001975 |
| 4610 | ENSP00000355565 | GO:0019083 | GO:0001963 |
| 4611 | ENSP00000355541 | GO:0019082 | GO:0001959 |
| 4612 | ENSP00000355471 | GO:0019080 | GO:0001958 |
| 4613 | ENSP00000355443 | GO:0019068 | GO:0001957 |
| 4614 | ENSP00000355430 | GO:0019058 | GO:0001944 |
| 4615 | ENSP00000353947 | GO:0018394 | GO:0001938 |
| 4616 | ENSP00000353246 | GO:0018393 | GO:0001933 |
| 4617 | ENSP00000352839 | GO:0018279 | GO:0001911 |
| 4618 | ENSP00000352626 | GO:0018216 | GO:0001906 |
| 4619 | ENSP00000350698 | GO:0018214 | GO:0001893 |
| 4620 | ENSP00000350352 | GO:0018212 | GO:0001890 |
| 4621 | ENSP00000350256 | GO:0018209 | GO:0001887 |
| 4622 | ENSP00000350011 | GO:0018205 | GO:0001885 |
| 4623 | ENSP00000349142 | GO:0018200 | GO:0001869 |
| 4624 | ENSP00000348722 | GO:0018198 | GO:0001840 |
| 4625 | ENSP00000348596 | GO:0018196 | GO:0001839 |
| 4626 | ENSP00000345793 | GO:0018195 | GO:0001837 |
| 4627 | ENSP00000345317 | GO:0018193 | GO:0001825 |
| 4628 | ENSP00000345163 | hsa04925   | GO:0001824 |
| 4629 | ENSP00000344453 | GO:0018171 | GO:0001819 |
| 4630 | ENSP00000343081 | GO:0018149 | GO:0001816 |
| 4631 | ENSP00000334364 | GO:0018146 | GO:0001763 |
| 4632 | ENSP00000334051 | GO:0018130 | GO:0001738 |
| 4633 | ENSP00000332887 | GO:0018108 | GO:0001731 |
| 4634 | ENSP00000332340 | GO:0018076 | GO:0001706 |
| 4635 | ENSP00000331815 | GO:0018027 | GO:0001701 |
| 4636 | ENSP00000331545 | GO:0018023 | GO:0001649 |
| 4637 | ENSP00000331111 | GO:0018022 | GO:0001578 |
| 4638 | ENSP00000330937 | GO:0017187 | GO:0001558 |
| 4639 | ENSP00000330737 | hsa04924   | GO:0001542 |
| 4640 | ENSP00000330384 | GO:0017158 | GO:0001510 |
| 4641 | ENSP00000330341 | GO:0017157 | GO:0001508 |
| 4642 | ENSP00000330049 | GO:0017144 | GO:0001502 |
| 4643 | ENSP00000328854 | GO:0017015 | GO:0001306 |
| 4644 | ENSP00000328690 | GO:0017004 | GO:0001189 |
| 4645 | ENSP00000328563 | GO:0016925 | GO:0001188 |
| 4646 | ENSP00000327585 | GO:0016601 | GO:0001101 |
| 4647 | ENSP00000327179 | GO:0016584 | GO:0000967 |
| 4648 | ENSP00000326981 | GO:0016578 | GO:0000956 |
| 4649 | ENSP00000326259 | GO:0016577 | GO:0000910 |
| 4650 | ENSP00000325682 | GO:0016575 | GO:0000904 |
| 4651 | ENSP00000325203 | GO:0016574 | GO:0000902 |
| 4652 | ENSP00000325128 | GO:0016573 | GO:0000819 |
| 4653 | ENSP00000324769 | GO:0016572 | GO:0000729 |
| 4654 | ENSP00000324251 | GO:0016571 | GO:0000726 |
| 4655 | ENSP00000323858 | GO:0016570 | GO:0000715 |
| 4656 | ENSP00000323853 | GO:0016569 | GO:0000480 |
| 4657 | ENSP00000323612 | GO:0016568 | GO:0000479 |
| 4658 | ENSP00000323424 | GO:0016567 | GO:0000478 |
| 4659 | ENSP00000322939 | GO:0016525 | GO:0000472 |
| 4660 | ENSP00000322450 | GO:0016486 | GO:0000469 |



|      |                 |            |            |
|------|-----------------|------------|------------|
| 4661 | ENSP00000322088 | GO:0016485 | GO:0000467 |
| 4662 | ENSP00000321506 | GO:0016482 | GO:0000466 |
| 4663 | ENSP00000321449 | GO:0016477 | GO:0000463 |
| 4664 | ENSP00000321426 | GO:0016458 | GO:0000462 |
| 4665 | ENSP00000321320 | GO:0016358 | GO:0000453 |
| 4666 | ENSP00000321246 | GO:0016337 | GO:0000447 |
| 4667 | ENSP00000320917 | GO:0016311 | GO:0000381 |
| 4668 | ENSP00000317159 | GO:0016310 | GO:0000377 |
| 4669 | ENSP00000316955 | GO:0016266 | GO:0000375 |
| 4670 | ENSP00000315674 | hsa04916   | GO:0000280 |
| 4671 | ENSP00000314441 | GO:0016265 | GO:0000278 |
| 4672 | ENSP00000313953 | GO:0016259 | GO:0000226 |
| 4673 | ENSP00000311038 | GO:0016241 | GO:0000183 |
| 4674 | ENSP00000310488 | GO:0016236 | GO:0000165 |
| 4675 | ENSP00000310337 | GO:0016197 | GO:0000122 |
| 4676 | ENSP00000310042 | GO:0016192 | GO:0000086 |
| 4677 | ENSP00000309673 | GO:0016180 | GO:0000083 |
| 4678 | ENSP00000308332 | GO:0016126 | GO:0000082 |
| 4679 | ENSP00000308270 | GO:0016125 | GO:0000079 |
| 4680 | ENSP00000308179 | GO:0016115 | GO:0000070 |
| 4681 | ENSP00000307598 | hsa04915   | GO:0000055 |
| 4682 | ENSP00000307525 | GO:0016103 | GO:0000045 |
| 4683 | ENSP00000307130 | GO:0016101 | GO:0000028 |
| 4684 | ENSP00000306974 | GO:0016093 | GO:0000027 |
| 4685 | ENSP00000306688 | GO:0016078 | GO:0000018 |
| 4686 | ENSP00000306651 | GO:0016075 | GO:0000003 |
| 4687 | ENSP00000306397 | GO:0016074 | hsa05414   |
| 4688 | ENSP00000306095 | GO:0016073 | hsa05203   |
| 4689 | ENSP00000305702 | GO:0016072 | hsa05202   |
| 4690 | ENSP00000305207 | GO:0016071 | hsa05200   |
| 4691 | ENSP00000304419 | GO:0016070 | hsa05169   |
| 4692 | ENSP00000304188 | hsa04912   | hsa05168   |
| 4693 | ENSP00000304151 | GO:0016064 | hsa05160   |
| 4694 | ENSP00000303983 | GO:0016056 | hsa05146   |
| 4695 | ENSP00000303864 | GO:0016055 | hsa05143   |
| 4696 | ENSP00000303834 | GO:0016054 | hsa05132   |
| 4697 | ENSP00000303515 | GO:0016053 | hsa05100   |
| 4698 | ENSP00000303076 | GO:0016052 | hsa05032   |
| 4699 | ENSP00000302886 | GO:0016050 | hsa05016   |
| 4700 | ENSP00000301587 | GO:0016049 | hsa05012   |
| 4701 | ENSP00000301364 | GO:0016048 | hsa05010   |
| 4702 | ENSP00000300773 | GO:0016043 | hsa04976   |
| 4703 | ENSP00000299166 | GO:0016042 | hsa04974   |
| 4704 | ENSP00000297990 | GO:0016032 | hsa04960   |
| 4705 | ENSP00000297873 | GO:0015992 | hsa04933   |
| 4706 | ENSP00000297439 | GO:0015991 | hsa04932   |
| 4707 | ENSP00000296802 | GO:0015988 | hsa04918   |
| 4708 | ENSP00000296684 | GO:0015986 | hsa04742   |
| 4709 | ENSP00000296099 | GO:0015985 | hsa04730   |
| 4710 | ENSP00000292301 | GO:0015980 | hsa04725   |
| 4711 | ENSP00000291576 | GO:0015959 | hsa04724   |
| 4712 | ENSP00000287022 | GO:0015931 | hsa04720   |
| 4713 | ENSP00000285949 | GO:0015919 | hsa04666   |

|      |                 |            |          |
|------|-----------------|------------|----------|
| 4714 | ENSP00000285814 | GO:0015918 | hsa04662 |
| 4715 | ENSP00000285600 | GO:0015874 | hsa04640 |
| 4716 | ENSP00000284727 | GO:0015872 | hsa04623 |
| 4717 | ENSP00000284690 | GO:0015853 | hsa04614 |
| 4718 | ENSP00000282050 | GO:0015851 | hsa04611 |
| 4719 | ENSP00000278409 | GO:0015850 | hsa04610 |
| 4720 | ENSP00000276689 | GO:0015849 | hsa04540 |
| 4721 | ENSP00000274849 | GO:0015844 | hsa04530 |
| 4722 | ENSP00000272521 | GO:0015837 | hsa04512 |
| 4723 | ENSP00000268854 | hsa04750   | hsa04330 |
| 4724 | ENSP00000268802 | GO:0015833 | hsa04310 |
| 4725 | ENSP00000268668 | GO:0015721 | hsa04261 |
| 4726 | ENSP00000268379 | GO:0015718 | hsa04260 |
| 4727 | ENSP00000267425 | GO:0015711 | hsa04145 |
| 4728 | ENSP00000266544 | GO:0015698 | hsa04144 |
| 4729 | ENSP00000265171 | GO:0015696 | hsa04142 |
| 4730 | ENSP00000264670 | GO:0015672 | hsa04120 |
| 4731 | ENSP00000264563 | GO:0015031 | hsa04114 |
| 4732 | ENSP00000263657 | GO:0014912 | hsa04060 |
| 4733 | ENSP00000262946 | GO:0014911 | hsa04022 |
| 4734 | ENSP00000262607 | GO:0014910 | hsa04015 |
| 4735 | ENSP00000261741 | GO:0014909 | hsa04014 |
| 4736 | ENSP00000261708 | GO:0014848 | hsa03420 |
| 4737 | ENSP00000260443 | GO:0014823 | hsa03030 |
| 4738 | ENSP00000260227 | GO:0014821 | hsa03022 |
| 4739 | ENSP00000260184 | GO:0014812 | hsa03020 |
| 4740 | ENSP00000259239 | GO:0014070 | hsa03018 |
| 4741 | ENSP00000259037 | GO:0014068 | hsa03015 |
| 4742 | ENSP00000258772 | GO:0014066 | hsa03013 |
| 4743 | ENSP00000258531 | GO:0014065 | hsa00983 |
| 4744 | ENSP00000258105 | GO:0014061 | hsa00982 |
| 4745 | ENSP00000254940 | GO:0014047 | hsa00980 |
| 4746 | ENSP00000254803 | GO:0014012 | hsa00970 |
| 4747 | ENSP00000254605 | GO:0012501 | hsa00900 |
| 4748 | ENSP00000253452 | GO:0010992 | hsa00860 |
| 4749 | ENSP00000253237 | GO:0010976 | hsa00830 |
| 4750 | ENSP00000252711 | GO:0010975 | hsa00670 |
| 4751 | ENSP00000251289 | GO:0010972 | hsa00590 |
| 4752 | ENSP00000250937 | GO:0010971 | hsa00562 |
| 4753 | ENSP00000248572 | GO:0010965 | hsa00533 |
| 4754 | ENSP00000247003 | GO:0010959 | hsa00520 |
| 4755 | ENSP00000246802 | GO:0010955 | hsa00510 |
| 4756 | ENSP00000244623 | GO:0010951 | hsa00480 |
| 4757 | ENSP00000244496 | GO:0010948 | hsa00410 |
| 4758 | ENSP00000244230 | GO:0010942 | hsa00310 |
| 4759 | ENSP00000238146 | GO:0010941 | hsa00280 |
| 4760 | ENSP00000236051 | GO:0010876 | hsa00260 |
| 4761 | ENSP00000233627 | GO:0010870 | hsa00250 |
| 4762 | ENSP00000232888 | GO:0010863 | hsa00240 |
| 4763 | ENSP00000230640 | GO:0010835 | hsa00220 |
| 4764 | ENSP00000230340 | GO:0010833 | hsa00190 |
| 4765 | ENSP00000229214 | GO:0010828 | hsa00140 |
| 4766 | ENSP00000225296 | GO:0010817 | hsa00120 |

|      |                 |            |            |
|------|-----------------|------------|------------|
| 4767 | ENSP00000223095 | GO:0010812 | hsa00100   |
| 4768 | ENSP00000220616 | GO:0010811 | hsa00072   |
| 4769 | ENSP00000215375 | GO:0010810 | hsa00030   |
| 4770 | ENSP00000209540 | GO:0010765 | hsa00020   |
| 4771 | ENSP00000203001 | GO:0010757 | GO:0097190 |
| 4772 | ENSP00000202816 | GO:0010755 | GO:1901701 |
| 4773 | ENSP00000001146 | GO:0010739 | GO:0043068 |
